# Supplementary material for: Coevolution between simple sequence repeats (SSRs) and virus genome size
Source: PubMed Central journal article supplement (PMC3585866; doi:10.1186/1471-2164-13-435), 2012-08-30
Supplement: 1471-2164-13-435-S1.pdf [file 1471-2164-13-435-S1.pdf]

## Additional file 1 List of the basic information of all analyzed viruses

| Family           | Subfamily        | Genus name          | Type species name                        | Acc. no.                  | Size (bp) | Coding S (%) | Genome no.   |
|------------------|------------------|---------------------|------------------------------------------|---------------------------|-----------|--------------|--------------|
| Myoviridae       | —                | T4-like viruses     | Enterobacteria phage T4                  | NC_000866                 | 168903    | 93           | S1-dsDNA-1   |
|                  |                  | P1-like viruses     | Enterobacteria phage P1                  | NC_005856                 | 94800     | 86           | S2-dsDNA-2   |
|                  |                  | P2-like viruses     | Enterobacteria phage P2                  | NC_001895                 | 33593     | 92           | S3-dsDNA-3   |
|                  |                  | Mulike viruses      | Enterobacteria phage Mu                  | NC_000929                 | 36717     | 94           | S4-dsDNA-4   |
|                  |                  | SP01like viruses    | Bacillus phage SPO1                      | NC_011421                 | 132562    | 89           | S5-dsDNA-5   |
| Siphoviridae     | —                | λ-like phages       | Enterobacteria phage λ                   | NC_001416                 | 48502     | 87           | S6-dsDNA-6   |
|                  |                  | T1-like viruses     | Enterobacteria phage T1                  | NC_005833                 | 48836     | 91           | S7-dsDNA-7   |
|                  |                  | T5-like viruses     | Enterobacteria phage T5                  | NC_005859                 | 121750    | 79           | S8-dsDNA-8   |
|                  |                  | c2-like viruses     | Lactococcus phage C2                     | NC_001706                 | 22172     | 92           | S9-dsDNA-9   |
|                  |                  | L5-like viruses     | Mycobacterium phage L5                   | NC_001335                 | 52297     | 87           | S10-dsDNA-10 |
|                  |                  | N15-like viruses    | Enterobacteria phage N15                 | NC_001901                 | 46375     | 90           | S11-dsDNA-11 |
|                  |                  | φ 31-like viruses   | Streptomyces phage φC31                  | NC_001978                 | 41491     | 89           | S12-dsDNA-12 |
| Podoviridae      | —                | T7-like viruses     | Enterobacteria phage T7                  | NC_001604                 | 39937     | 92           | S13-dsDNA-13 |
|                  |                  | φ 29-like viruses   | Bacillus phage φ 29                      | NC_011048                 | 19282     | 93           | S14-dsDNA-14 |
|                  |                  | P22-like viruses    | Enterobacteria phage P22                 | NC_002371                 | 41724     | 90           | S15-dsDNA-15 |
|                  |                  | N4-like viruses     | Enterobacteria phage N4                  | NC_008720                 | 70153     | 94           | S16-dsDNA-16 |
| Tectiviridae     | —                | Tectivirus          | Enterobacteria phage PRD1                | NC_001421                 | 14927     | 95           | S17-dsDNA-17 |
| Corticoviridae   | —                | Corticovirus        | Pseudoalteromonas phage PM2              | NC_000867                 | 10079     | 92           | S18-dsDNA-18 |
| Plasmaviridae    | —                | Plasmavirus         | Acholeplasma phage L2                    | NC_001447                 | 11965     | 82           | S19-dsDNA-19 |
| Lipothrixviridae | —                | Betalipothrixvirus  | Sulfolobus islandicus filamentous virus  | NC_003214                 | 40900     | 88           | S20-dsDNA-20 |
|                  |                  | Gammalipothrixvirus | Acidianus filamentous virus 1            | NC_005830                 | 20869     | 91           | S21-dsDNA-21 |
| Rudiviridae      | —                | Rudivirus           | Sulfolobus islandicus rod-shaped virus 2 | NC_004086                 | 35450     | 79           | S22-dsDNA-22 |
| Fuselloviridae   | —                | Fusellovirus        | Sulfolobus spindle-shaped virus 1        | NC_001338                 | 15465     | 90           | S23-dsDNA-23 |
| —                | —                | Salterprovirus      | His1 virus                               | NC_007914                 | 14462     | 91           | S24-dsDNA-24 |
| Poxviridae       | Chordopoxvirinae | Orthopoxvirus       | Vaccinia virus                           | NC_006998                 | 194711    | 88           | S25-dsDNA-25 |
|                  |                  | Parapoxvirus        | Orf virus                                | NC_005336                 | 139962    | 89           | S26-dsDNA-26 |
|                  |                  | Avipoxvirus         | Fowlpox virus                            | NC_002188                 | 288539    | 84           | S27-dsDNA-27 |
|                  |                  | Capripoxvirus       | Sheeppox virus                           | NC_004002                 | 149955    | 93           | S28-dsDNA-28 |
|                  |                  | Leporipoxvirus      | Myxoma virus                             | NC_001132                 | 161773    | 95           | S29-dsDNA-29 |
|                  |                  | Suipoxvirus         | Swinepox virus                           | NC_003389                 | 146454    | 96           | S30-dsDNA-30 |
|                  |                  | Molluscipoxvirus    | Molluscum contagiosum virus              | NC_001731                 | 190289    | 85           | S31-dsDNA-31 |
|                  |                  | Yatapoxvirus        | Yaba monkey tumor virus                  | NC_005179                 | 134721    | 94           | S32-dsDNA-32 |
|                  | Entomopoxvirinae | Betaentomopoxvirus  | Amsacta moorei entomopoxvirus 'L'        | NC_002520                 | 232392    | 91           | S33-dsDNA-33 |
|                  | Asfarviridae     | —                   | Asfivirus                                | African swine fever virus | NC_001659 | 170101       | 87           |
| Iridoviridae     | —                | Iridovirus          | invertebrates iridescent virus 6         | NC_003038                 | 212482    | 90           | S35-dsDNA-35 |
|                  |                  | Chloriridovirus     | invertebrates iridescent virus 3         | NC_008187                 | 191100    | 68           | S36-dsDNA-36 |

Additional file 1 Continued

|                  |                    |                       |                                             |                      |           |        |              |              |
|------------------|--------------------|-----------------------|---------------------------------------------|----------------------|-----------|--------|--------------|--------------|
|                  |                    | Ranavirus             | Frog virus 3                                | NC_005946            | 105903    | 79     | S37-dsDNA-37 |              |
|                  |                    | Lymphocystivirus      | Lymphocystis disease virus 1                | NC_001824            | 102653    | 92     | S38-dsDNA-38 |              |
|                  |                    | Megalocytivirus       | Infectious spleen and kidney necrosis virus | NC_003494            | 111362    | 93     | S39-dsDNA-39 |              |
| Phycodnaviridae  | —                  | Chlorovirus           | Paramecium bursaria Chlorella virus 1       | NC_000852            | 330743    | 90     | S40-dsDNA-40 |              |
|                  |                    | Phaeovirus            | Ectocarpus siliculosus virus 1              | NC_002687            | 335593    | 70     | S41-dsDNA-41 |              |
|                  |                    | Coccolithovirus       | Emiliania huxleyi virus 86                  | NC_007346            | 407339    | 90     | S42-dsDNA-42 |              |
| Baculoviridae    | —                  | Nucleopolyhedrovirus  | Autographa californica nucleopolyhedrovirus | NC_001623            | 133894    | 91     | S43-dsDNA-43 |              |
|                  | —                  | Granulovirus          | Cydia pomonella granulovirus                | NC_002816            | 123500    | 88     | S44-dsDNA-44 |              |
| Nimaviridae      | —                  | Whispovirus           | Shrimp white spot syndrome virus            | NC_003225            | 305107    | 92     | S45-dsDNA-45 |              |
| Herpesviridae    | —                  | Ictalurivirus         | Ictalurid herpesvirus 1                     | NC_001493            | 134226    | 83     | S46-dsDNA-46 |              |
|                  |                    | Alphaherpesvirinae    | Simplexvirus                                | Human herpesvirus 1  | NC_001806 | 152261 | 79           | S47-dsDNA-47 |
|                  |                    |                       | Varicellovirus                              | Human herpesvirus 3  | NC_001348 | 124884 | 89           | S48-dsDNA-48 |
|                  |                    |                       | Mardivirus                                  | Gallid herpesvirus 2 | NC_002229 | 177874 | 73           | S49-dsDNA-49 |
|                  | Iltovirus          |                       | Gallid herpesvirus 1                        | NC_006623            | 148687    | 81     | S50-dsDNA-50 |              |
|                  | Betaherpesvirinae  | Cytomegalovirus       | Human herpesvirus 5                         | NC_006273            | 235646    | 79     | S51-dsDNA-51 |              |
|                  |                    | Muromegalovirus       | Murid herpesvirus 1                         | NC_004065            | 230278    | 72     | S52-dsDNA-52 |              |
|                  |                    | Roseolovirus          | Human herpesvirus 6                         | NC_001664            | 159322    | 79     | S53-dsDNA-53 |              |
|                  | Gammaherpesvirinae | Lymphocryptovirus     | Human herpesvirus 4                         | NC_009334            | 172764    | 68     | S54-dsDNA-54 |              |
|                  |                    | Rhadinovirus          | Saimiriine herpesvirus 2                    | NC_001350            | 112930    | 87     | S55-dsDNA-55 |              |
| Adenoviridae     | —                  | Mastadenovirus        | Human adenovirus C                          | NC_001405            | 35937     | 90     | S56-dsDNA-56 |              |
|                  |                    | Aviadenovirus         | Fowl adenovirus A                           | AC_000014            | 43804     | 84     | S57-dsDNA-57 |              |
|                  |                    | Atadenovirus          | Ovine adenovirus D                          | NC_004037            | 29576     | 92     | S58-dsDNA-58 |              |
|                  |                    | Siadenovirus          | Frog adenovirus 1                           | NC_002501            | 26163     | 92     | S59-dsDNA-59 |              |
| Polyomaviridae   | —                  | Polyomavirus          | Simian virus 40                             | NC_001669            | 5243      | 89     | S60-dsDNA-60 |              |
| Papillomaviridae | —                  | Alphapapillomavirus   | Human papillomavirus type 32                | NC_001586            | 7961      | 84     | S61-dsDNA-61 |              |
|                  |                    | Betapapillomavirus    | Human papillomavirus type 5                 | NC_001531            | 7746      | 92     | S62-dsDNA-62 |              |
|                  |                    | Gammapapillomavirus   | Human papillomavirus type 4                 | NC_001457            | 7353      | 92     | S63-dsDNA-63 |              |
|                  |                    | Deltapapillomavirus   | European elk papillomavirus                 | NC_001524            | 8095      | 91     | S64-dsDNA-64 |              |
|                  |                    | Epsilonpapillomavirus | Bovine papillomavirus type 5                | NC_004195            | 7841      | 86     | S65-dsDNA-65 |              |
|                  |                    | Zetapapillomavirus    | Equus caballus papillomavirus 1             | NC_003748            | 7610      | 87     | S66-dsDNA-66 |              |
|                  |                    | Etapapillomavirus     | Fringilla coelebs papillomavirus            | NC_004068            | 7729      | 89     | S67-dsDNA-67 |              |
|                  |                    | Thetapapillomavirus   | Psittacus erithacus timneh papillomavirus   | NC_003973            | 7304      | 93     | S68-dsDNA-68 |              |
|                  |                    | Iotapapillomavirus    | Mastomys natalensis papillomavirus          | NC_001605            | 7687      | 92     | S69-dsDNA-69 |              |
|                  |                    | Kappapapillomavirus   | Cottontail rabbit papillomavirus            | NC_001541            | 7868      | 90     | S70-dsDNA-70 |              |
|                  |                    | Lambdapapillomavirus  | Canine oral papillomavirus                  | NC_001619            | 8607      | 77     | S71-dsDNA-71 |              |
|                  |                    | Mupapillomavirus      | Human papillomavirus 1                      | NC_001356            | 7815      | 86     | S72-dsDNA-72 |              |
|                  |                    | Nupapillomavirus      | Human papillomavirus type 41                | NC_001354            | 7614      | 90     | S73-dsDNA-73 |              |
|                  |                    | Xipapillomavirus      | Bovine papillomavirus 3                     | NC_004197            | 7276      | 91     | S74-dsDNA-74 |              |

|                                                         |                                                          |           |       |     |              |
|---------------------------------------------------------|----------------------------------------------------------|-----------|-------|-----|--------------|
| Omicronpapillomavirus                                   | Phocoena spinipinnis papillomavirus                      | NC_003348 | 7879  | 89  | S75-dsDNA-75 |
| Polydnaviridae                                          | Campoletis sonorensis ichnovirus superhelical segment A  | NC_007997 | 6138  | N/A | S76-dsDNA-76 |
|                                                         | Campoletis sonorensis ichnovirus superhelical segment A2 | NC_008005 | 6283  | N/A |              |
|                                                         | Campoletis sonorensis ichnovirus superhelical segment B  | NC_007987 | 6567  | N/A |              |
|                                                         | Campoletis sonorensis ichnovirus superhelical segment C  | NC_007986 | 7276  | N/A |              |
|                                                         | Campoletis sonorensis ichnovirus superhelical segment D  | NC_008008 | 7604  | N/A |              |
|                                                         | Campoletis sonorensis ichnovirus superhelical segment E  | NC_007988 | 7760  | N/A |              |
|                                                         | Campoletis sonorensis ichnovirus superhelical segment F  | NC_008004 | 7887  | N/A |              |
|                                                         | Campoletis sonorensis ichnovirus superhelical segment G  | NC_007989 | 8284  | N/A |              |
|                                                         | Campoletis sonorensis ichnovirus superhelical segment G2 | NC_007990 | 8171  | N/A |              |
|                                                         | Campoletis sonorensis ichnovirus superhelical segment H  | NC_007991 | 8315  | N/A |              |
|                                                         | Campoletis sonorensis ichnovirus superhelical segment I  | NC_007992 | 8600  | N/A |              |
|                                                         | Campoletis sonorensis ichnovirus superhelical segment I2 | NC_007995 | 8864  | N/A |              |
|                                                         | Campoletis sonorensis ichnovirus superhelical segment J  | NC_007993 | 9155  | N/A |              |
|                                                         | Campoletis sonorensis ichnovirus superhelical segment L  | NC_007994 | 9391  | N/A |              |
|                                                         | Campoletis sonorensis ichnovirus superhelical segment M  | NC_007996 | 10223 | N/A |              |
|                                                         | Campoletis sonorensis ichnovirus superhelical segment N  | NC_008006 | 10757 | N/A |              |
|                                                         | Campoletis sonorensis ichnovirus superhelical segment O1 | NC_007998 | 11285 | N/A |              |
|                                                         | Campoletis sonorensis ichnovirus superhelical segment P  | NC_007999 | 11841 | N/A |              |
|                                                         | Campoletis sonorensis ichnovirus superhelical segment Q  | NC_007985 | 12098 | 18  |              |
|                                                         | Campoletis sonorensis ichnovirus superhelical segment T  | NC_008000 | 14531 | N/A |              |
| Campoletis sonorensis ichnovirus superhelical segment U | NC_008001                                                | 14825     | N/A   |     |              |

Polydnaviridae

Ichnovirus

Additional file 1 Continued

|               |   |                     |                                                          |           |        |     |              |
|---------------|---|---------------------|----------------------------------------------------------|-----------|--------|-----|--------------|
|               |   |                     | Campoletis sonorensis ichtnovirus superhelical segment V | NC_008003 | 15510  | 6   |              |
|               |   |                     | Campoletis sonorensis ichtnovirus chromosome segment W   | NC_008007 | 15812  | 7   |              |
|               |   |                     | Campoletis sonorensis ichtnovirus chromosome segment Z   | NC_008002 | 19557  | N/A |              |
| Ascoviridae   | — | Ascovirus           | Spodoptera frugiperda ascovirus 1a                       | NC_008361 | 156922 | 68  | S77-dsDNA-77 |
| Inoviridae    | — | Inovirus            | Enterobacteria phage M13                                 | NC_003287 | 6407   | 91  | S78-ssDNA-1  |
|               |   | Plectrovirus        | Acholeplasma phage MV-L1                                 | NC_001341 | 4491   | 48  | S79-ssDNA-2  |
| Microviridae  | — | Microvirus          | Enterobacteria phage φX174                               | NC_001422 | 5386   | 95  | S80-ssDNA-3  |
|               |   | Spiromicrovirus     | Spiroplasma phage 4                                      | NC_003438 | 4421   | 93  | S81-ssDNA-4  |
|               |   | Bdellovirovirus     | Bdellovibrio phage phiMH2K                               | NC_002643 | 4594   | 86  | S82-ssDNA-5  |
|               |   | Chlamydiamicrovirus | Chlamydia phage Chp1                                     | NC_001741 | 4877   | 94  | S83-ssDNA-6  |
| Geminiviridae | — | Mastrevirus         | Maize streak virus - A[South Africa]                     | NC_001346 | 2690   | 82  | S84-ssDNA-7  |
|               |   | Curtovirus          | Beet curly top virus - California                        | NC_001412 | 2994   | 88  | S85-ssDNA-8  |
|               |   | Begomovirus         | Bean golden yellow mosaic virus DNA A                    | NC_001439 | 2647   | 87  | S86-ssDNA-9  |
|               |   |                     | Bean golden yellow mosaic virus DNA B                    | NC_001438 | 2585   | 63  |              |
|               |   | Topocovirus         | Tomato pseudo-curly top virus                            | NC_003825 | 2861   | 89  | S87-ssDNA-10 |
| Circoviridae  | — | Circovirus          | Porcine circovirus 1                                     | NC_001792 | 1758   | 92  | S88-ssDNA-11 |
|               |   | Gyrovirus           | Chicken anemia virus                                     | NC_001427 | 2319   | 90  | S89-ssDNA-12 |
| —             | — | Anellovirus         | Torque teno virus (TTV)                                  | NC_002076 | 3852   | 70  | S90-ssDNA-13 |
| Nanoviridae   | — | Nanovirus           | Subterranean clover stunt virus DNA 1                    | NC_003813 | 1001   | 33  | S91-ssDNA-14 |
|               |   |                     | Subterranean clover stunt virus DNA 2                    | NC_003814 | 1022   | 82  |              |
|               |   |                     | Subterranean clover stunt virus DNA 3                    | NC_003815 | 991    | 49  |              |
|               |   |                     | Subterranean clover stunt virus DNA 4                    | NC_003816 | 1002   | 46  |              |
|               |   |                     | Subterranean clover stunt virus DNA 5                    | NC_003817 | 998    | 51  |              |
|               |   |                     | Subterranean clover stunt virus DNA 6                    | NC_003818 | 1017   | 84  |              |
|               |   |                     | Subterranean clover stunt virus DNA 7                    | NC_003819 | 988    | 44  |              |
|               |   |                     | Subterranean clover stunt virus DNA 8                    | NC_003812 | 1005   | 85  |              |
|               |   | Babuvirus           | Banana bunchy top virus DNA 1                            | NC_003479 | 1111   | 77  | S92-ssDNA-15 |
|               |   |                     | Banana bunchy top virus DNA 2                            | NC_003475 | 1060   | N/A |              |

|                |                   |                                   |                                   |           |       |               |                 |
|----------------|-------------------|-----------------------------------|-----------------------------------|-----------|-------|---------------|-----------------|
|                |                   |                                   | Banana bunchy top virus DNA 3     | NC_003473 | 1075  | 49            |                 |
|                |                   |                                   | Banana bunchy top virus DNA 4     | NC_003474 | 1043  | 33            |                 |
|                |                   |                                   | Banana bunchy top virus DNA 5     | NC_003477 | 1018  | 47            |                 |
|                |                   |                                   | Banana bunchy top virus DNA 6     | NC_003476 | 1089  | 42            |                 |
| Parvoviridae   | Parvovirinae      | Parvovirus                        | Minute virus of mice              | NC_001510 | 5149  | 86            | S93-ssDNA-16    |
|                |                   | Erythrovirus                      | Human parvovirus B19              | NC_000883 | 5594  | 77            | S94-ssDNA-17    |
|                |                   | Dependovirus                      | Adeno-associated virus - 2        | NC_001401 | 4679  | 87            | S95-ssDNA-18    |
|                |                   | Amdovirus                         | Aleutian mink disease virus       | NC_001662 | 4801  | 82            | S96-ssDNA-19    |
|                |                   | Bocavirus                         | Bovine parvovirus                 | NC_001540 | 5517  | 82            | S97-ssDNA-20    |
|                | Densovirinae      | Densovirus                        | Junonia coenia densovirus         | NC_004284 | 5908  | 78            | S98-ssDNA-21    |
|                |                   | Iteravirus                        | Bombyx mori densovirus 5          | NC_004287 | 5078  | 84            | S99-ssDNA-22    |
|                |                   | Brevidensovirus                   | Aedes aegypti densovirus          | NC_012636 | 3776  | 92            | S100-ssDNA-23   |
| Pefudensovirus |                   | Periplaneta fuliginosa densovirus | NC_000936                         | 5454      | 94    | S101-ssDNA-24 |                 |
| Hepadnaviridae | —                 | Orthohepadnavirus                 | Hepatitis B virus                 | NC_003977 | 3215  | 100           | S102-dsDNA-RT-1 |
|                |                   | Avihepadnavirus                   | Duck hepatitis B virus            | NC_001344 | 3027  | 100           | S103-dsDNA-RT-2 |
| Caulimoviridae | —                 | Caulimovirus                      | Cauliflower mosaic virus          | NC_001497 | 8024  | 89            | S104-dsDNA-RT-3 |
|                |                   | Soymovirus                        | Soybean chlorotic mottle virus    | NC_001739 | 8178  | 93            | S105-dsDNA-RT-4 |
|                |                   | Cavemovirus                       | Cassava vein mosaic virus         | NC_001648 | 8159  | 93            | S106-dsDNA-RT-5 |
|                |                   | Tungrovirus                       | Rice tungro bacilliform virus     | NC_001914 | 8002  | 89            | S107-dsDNA-RT-6 |
|                |                   | Badnavirus                        | Commelina yellow mottle virus     | NC_001343 | 7489  | 89            | S108-dsDNA-RT-7 |
|                |                   | Petuvirus                         | Petunia vein clearing virus       | NC_001839 | 7206  | 90            | S109-dsDNA-RT-8 |
| Retroviridae   | Orthoretrovirinae | Betaretrovirus                    | Mouse mammary tumor virus         | NC_001503 | 8805  | 91            | S110-ssRNA-RT-1 |
|                |                   | Gammaretrovirus                   | Rauscher murine leukemia virus    | NC_001819 | 8282  | 86            | S111-ssRNA-RT-2 |
|                |                   | Alpharetrovirus                   | Avian leukosis virus - RSA        | NC_001408 | 7286  | 65            | S112-ssRNA-RT-3 |
|                |                   | Deltaretrovirus                   | Bovine leukemia virus             | NC_001414 | 8419  | 79            | S113-ssRNA-RT-4 |
|                |                   | Lentivirus                        | Human immunodeficiency virus 1    | NC_001802 | 9181  | 93            | S114-ssRNA-RT-5 |
|                |                   | Epsilonretrovirus                 | Walleye dermal sarcoma virus      | NC_001867 | 12708 | 86            | S115-ssRNA-RT-6 |
|                | Spumaretrovirinae | Spumavirus                        | Simian foamy virus                | NC_001364 | 13246 | 78            | S116-ssRNA-RT-7 |
| Cystoviridae   | —                 | Cystovirus                        | Pseudomonas phage phi-6 segment L | NC_003715 | 6374  | 90            | S117-dsRNA-1    |
|                |                   |                                   | Pseudomonas phage phi-6 segment M | NC_003716 | 4063  | 68            |                 |
|                |                   |                                   | Pseudomonas phage phi-6 segment S | NC_003714 | 2948  | 66            |                 |

|            |   |               |                                      |           |      |     |              |
|------------|---|---------------|--------------------------------------|-----------|------|-----|--------------|
| Reoviridae | — | Orthoreovirus | Mammalian orthoreovirus 3 segment L1 | NC_004282 | 3860 | 98  | S118-dsRNA-2 |
|            |   |               | Mammalian orthoreovirus 3 segment L2 | NC_004275 | 3916 | 98  |              |
|            |   |               | Mammalian orthoreovirus 3 segment L3 | NC_004274 | 3901 | 98  |              |
|            |   |               | Mammalian orthoreovirus 3 segment M1 | NC_004280 | 2304 | 95  |              |
|            |   |               | Mammalian orthoreovirus 3 segment M2 | NC_004278 | 2207 | 96  |              |
|            |   |               | Mammalian orthoreovirus 3 segment M3 | NC_004281 | 2235 | 96  |              |
|            |   |               | Mammalian orthoreovirus 3 segment S1 | NC_004277 | 1416 | 96  |              |
|            |   |               | Mammalian orthoreovirus 3 segment S2 | NC_004279 | 1331 | 94  |              |
|            |   |               | Mammalian orthoreovirus 3 segment S3 | NC_004283 | 1198 | 91  |              |
|            |   |               | Mammalian orthoreovirus 3 segment S4 | NC_004276 | 1196 | 91  |              |
|            |   | Orbivirus     | Bluetongue virus segment 1           | NC_006023 | 3944 | 99  | S119-dsRNA-3 |
|            |   |               | Bluetongue virus segment 2           | NC_006013 | 2953 | 97  |              |
|            |   |               | Bluetongue virus segment 3           | NC_006014 | 2772 | 97  |              |
|            |   |               | Bluetongue virus segment 4           | NC_006024 | 1980 | 97  |              |
|            |   |               | Bluetongue virus segment 5           | NC_006025 | 1769 | 93  |              |
|            |   |               | Bluetongue virus segment 6           | NC_006010 | 1638 | 96  |              |
|            |   |               | Bluetongue virus segment 7           | NC_006022 | 1156 | 90  |              |
|            |   |               | Bluetongue virus segment 8           | NC_006007 | 1125 | 94  |              |
|            |   |               | Bluetongue virus segment 9           | NC_006008 | 1049 | 94  |              |
|            |   |               | Bluetongue virus segment 10          | NC_006015 | 822  | 83  |              |
|            |   | Rotavirus     | Rotavirus A segment 1                | NC_011507 | 3267 | 100 | S120-dsRNA-4 |
|            |   |               | Rotavirus A segment 2                | NC_011506 | 2649 | 100 |              |
|            |   |               | Rotavirus A segment 3                | NC_011508 | 2508 | 100 |              |
|            |   |               | Rotavirus A segment 4                | NC_011510 | 2331 | 100 |              |
|            |   |               | Rotavirus A segment 5                | NC_011500 | 1491 | 100 |              |
|            |   |               | Rotavirus A segment 6                | NC_011509 | 1194 | 100 |              |
|            |   |               | Rotavirus A segment 7                | NC_011502 | 954  | 100 |              |
|            |   |               | Rotavirus A segment 8                | NC_011501 | 948  | 100 |              |
|            |   |               | Rotavirus A segment 9                | NC_011503 | 981  | 100 |              |
|            |   |               | Rotavirus A segment 10               | NC_011504 | 528  | 100 |              |
|            |   | Coltivirus    | Colorado tick fever virus segment 1  | NC_004181 | 4350 | 99  | S121-dsRNA-5 |
|            |   |               | Colorado tick fever virus segment 2  | NC_004182 | 3909 | 92  |              |

Additional file 1 Continued

|  |              |                                         |           |      |     |              |
|--|--------------|-----------------------------------------|-----------|------|-----|--------------|
|  |              | Colorado tick fever virus segment 3     | NC_004183 | 3586 | 98  |              |
|  |              | Colorado tick fever virus segment 4     | NC_004184 | 3157 | 97  |              |
|  |              | Colorado tick fever virus segment 5     | NC_004185 | 2432 | 92  |              |
|  |              | Colorado tick fever virus segment 6     | NC_004186 | 2141 | 97  |              |
|  |              | Colorado tick fever virus segment 7     | NC_004187 | 2133 | 96  |              |
|  |              | Colorado tick fever virus segment 8     | NC_004188 | 2029 | 97  |              |
|  |              | Colorado tick fever virus segment 9     | NC_004180 | 1884 | 96  |              |
|  |              | Colorado tick fever virus segment 10    | NC_004189 | 1880 | 96  |              |
|  |              | Colorado tick fever virus segment 11    | NC_004191 | 998  | 75  |              |
|  |              | Colorado tick fever virus segment 12    | NC_004190 | 675  | 82  |              |
|  | Aquareovirus | Aquareovirus A segment 1                | NC_007582 | 3947 | 98  | S122-dsRNA-6 |
|  |              | Aquareovirus A segment 2                | NC_007583 | 3867 | 96  |              |
|  |              | Aquareovirus A segment 3                | NC_007584 | 3690 | 98  |              |
|  |              | Aquareovirus A segment 4                | NC_007585 | 1619 | 72  |              |
|  |              | Aquareovirus A segment 5                | NC_007586 | 2242 | N/A |              |
|  |              | Aquareovirus A segment 6                | NC_007592 | 2052 | 94  |              |
|  |              | Aquareovirus A segment 7                | NC_007587 | 1395 | N/A |              |
|  |              | Aquareovirus A segment 8                | NC_007588 | 1317 | 95  |              |
|  |              | Aquareovirus A segment 9                | NC_007589 | 1118 | 94  |              |
|  |              | Aquareovirus A segment 10               | NC_007590 | 985  | 91  |              |
|  |              | Aquareovirus A segment 11               | NC_007591 | 783  | 90  |              |
|  | Cypovirus    | Lymantria dispar cypovirus 1 segment 1  | NC_003016 | 4164 | 96  | S123-dsRNA-7 |
|  |              | Lymantria dispar cypovirus 1 segment 2  | NC_003017 | 3853 | 95  |              |
|  |              | Lymantria dispar cypovirus 1 segment 3  | NC_003018 | 3846 | 96  |              |
|  |              | Lymantria dispar cypovirus 1 segment 4  | NC_003019 | 3262 | 97  |              |
|  |              | Lymantria dispar cypovirus 1 segment 5  | NC_003020 | 2851 | 92  |              |
|  |              | Lymantria dispar cypovirus 1 segment 6  | NC_003021 | 1792 | 94  |              |
|  |              | Lymantria dispar cypovirus 1 segment 7  | NC_003022 | 1501 | 89  |              |
|  |              | Lymantria dispar cypovirus 1 segment 8  | NC_003023 | 1332 | 88  |              |
|  |              | Lymantria dispar cypovirus 1 segment 9  | NC_003024 | 1187 | 81  |              |
|  |              | Lymantria dispar cypovirus 1 segment 10 | NC_003025 | 944  | 79  |              |
|  | Fijivirus    | Fiji disease virus segment 1            | NC_007159 | 4532 | 97  | S124-dsRNA-8 |
|  |              | Fiji disease virus segment 2            | NC_007154 | 3820 | 93  |              |

Additional file 1 Continued

|  |  |               |                                         |           |      |    |               |
|--|--|---------------|-----------------------------------------|-----------|------|----|---------------|
|  |  |               | Fiji disease virus segment 3            | NC_007158 | 3623 | 96 |               |
|  |  |               | Fiji disease virus chromosome segment 4 | NC_007155 | 3568 | 96 |               |
|  |  |               | Fiji disease virus segment 5            | NC_007160 | 3150 | 95 |               |
|  |  |               | Fiji disease virus segment 6            | NC_007157 | 2831 | 89 |               |
|  |  |               | Fiji disease virus segment 7            | NC_007163 | 2194 | 92 |               |
|  |  |               | Fiji disease virus segment 8            | NC_007161 | 1959 | 91 |               |
|  |  |               | Fiji disease virus segment 9            | NC_007156 | 1843 | 88 |               |
|  |  |               | Fiji disease virus segment 10           | NC_007162 | 1819 | 91 |               |
|  |  | Phytoreovirus | Rice gall dwarf virus segment S1        | NC_009248 | 4505 | 97 | S125-dsRNA-9  |
|  |  |               | Rice gall dwarf virus segment S2        | NC_009244 | 3514 | 98 |               |
|  |  |               | Rice gall dwarf virus segment S3        | NC_009243 | 3224 | 95 |               |
|  |  |               | Rice gall dwarf virus segment S4        | NC_009249 | 2622 | 83 |               |
|  |  |               | Rice gall dwarf virus segment S5        | NC_009247 | 2542 | 94 |               |
|  |  |               | Rice gall dwarf virus segment S6        | NC_009250 | 1648 | 89 |               |
|  |  |               | Rice gall dwarf virus segment S7        | NC_009251 | 1652 | 92 |               |
|  |  |               | Rice gall dwarf virus segment S8        | NC_009241 | 1578 | 81 |               |
|  |  |               | Rice gall dwarf virus segment S9        | NC_009246 | 1202 | 80 |               |
|  |  |               | Rice gall dwarf virus segment S10       | NC_009242 | 1198 | 80 |               |
|  |  |               | Rice gall dwarf virus segment S11       | NC_009245 | 1171 | 91 |               |
|  |  |               | Rice gall dwarf virus segment S12       | NC_009252 | 853  | 72 |               |
|  |  | Oryzavirus    | Rice ragged stunt virus segment 1       | NC_003749 | 3849 | 96 | S126-dsRNA-10 |
|  |  |               | Rice ragged stunt virus segment 2       | NC_003750 | 3808 | 93 |               |
|  |  |               | Rice ragged stunt virus segment 3       | NC_003751 | 3699 | 95 |               |
|  |  |               | Rice ragged stunt virus segment 4       | NC_003771 | 3823 | 98 |               |
|  |  |               | Rice ragged stunt virus segment 5       | NC_003759 | 2682 | 90 |               |
|  |  |               | Rice ragged stunt virus segment 6       | NC_003752 | 2157 | 82 |               |
|  |  |               | Rice ragged stunt virus segment 7       | NC_003770 | 1938 | 94 |               |
|  |  |               | Rice ragged stunt virus segment 8       | NC_003758 | 1914 | 93 |               |
|  |  |               | Rice ragged stunt virus segment 9       | NC_003757 | 1132 | 89 |               |
|  |  |               | Rice ragged stunt virus segment 10      | NC_003769 | 1162 | 76 |               |
|  |  | Seadornavirus | Banna virus segment 1                   | NC_004211 | 3747 | 97 | S127-dsRNA-11 |
|  |  |               | Banna virus segment 2                   | NC_004217 | 3048 | 93 |               |
|  |  |               | Banna virus segment 3                   | NC_004218 | 2400 | 90 |               |
|  |  |               | Banna virus segment 4                   | NC_004219 | 2038 | 84 |               |
|  |  |               | Banna virus segment 5                   | NC_004220 | 1716 | 88 |               |
|  |  |               | Banna virus segment 6                   | NC_004221 | 1671 | 76 |               |
|  |  |               | Banna virus segment 7                   | NC_004204 | 1136 | 81 |               |
|  |  |               | Banna virus segment 8                   | NC_004203 | 1119 | 81 |               |
|  |  |               | Banna virus segment 9                   | NC_004202 | 1101 | 77 |               |
|  |  |               | Banna virus segment 10                  | NC_004201 | 977  | 76 |               |
|  |  |               | Banna virus segment 11                  | NC_004200 | 867  | 62 |               |
|  |  |               | Banna virus segment 12                  | NC_004198 | 862  | 72 |               |

|                |   |                  |                                                |           |       |     |               |
|----------------|---|------------------|------------------------------------------------|-----------|-------|-----|---------------|
|                |   | Mycoreovirus     | Mycoreovirus 1 segment 1                       | NC_010743 | 4127  | 98  | S128-dsRNA-12 |
|                |   |                  | Mycoreovirus 1 segment 2                       | NC_010744 | 3846  | 96  |               |
|                |   |                  | Mycoreovirus 1 segment 3                       | NC_010745 | 3258  | 98  |               |
|                |   |                  | Mycoreovirus 1 segment 4                       | NC_010746 | 2269  | 95  |               |
|                |   |                  | Mycoreovirus 1 segment 5                       | NC_010747 | 2056  | 94  |               |
|                |   |                  | Mycoreovirus 1 segment 6                       | NC_010748 | 2023  | 96  |               |
|                |   |                  | Mycoreovirus 1 segment 7                       | NC_010749 | 1539  | 91  |               |
|                |   |                  | Mycoreovirus 1 segment 8                       | NC_010750 | 1536  | 94  |               |
|                |   |                  | Mycoreovirus 1 segment 9                       | NC_010751 | 1072  | 83  |               |
|                |   |                  | Mycoreovirus 1 segment 10                      | NC_010752 | 975   | 76  |               |
|                |   |                  | Mycoreovirus 1 segment 11                      | NC_010753 | 732   | 41  |               |
| Birnaviridae   | — | Aquabirnavirus   | Infectious pancreatic necrosis virus segment A | NC_001915 | 3097  | 95  | S129-dsRNA-13 |
|                |   |                  | Infectious pancreatic necrosis virus segment B | NC_001916 | 2784  | 91  |               |
|                |   | Avibirnavirus    | Infectious bursal disease virus segment A      | NC_004178 | 3183  | 96  | S130-dsRNA-14 |
|                |   |                  | Infectious bursal disease virus segment B      | NC_004179 | 2715  | 97  |               |
|                |   | Entombirnavirus  | Drosophila x virus segment A                   | NC_004177 | 3360  | 92  | S131-dsRNA-15 |
|                |   |                  | Drosophila x virus segment B                   | NC_004169 | 3243  | 92  |               |
| Totiviridae    | — | Totivirus        | Saccharomyces cerevisiae virus L-A (L1)        | NC_003745 | 4579  | 98  | S132-dsRNA-16 |
|                |   | Giardiavirus     | Giardia lamblia virus                          | NC_003555 | 6277  | 89  | S133-dsRNA-17 |
|                |   | Leishmaniavirus  | Leishmania RNA virus 1 - 1                     | NC_002063 | 5284  | 94  | S134-dsRNA-18 |
| Partitiviridae | — | Partitivirus     | Atkinsonella hypoxylon partitivirus RNA 1      | NC_003470 | 2180  | 91  | S135-dsRNA-19 |
|                |   |                  | Atkinsonella hypoxylon partitivirus RNA 2      | NC_003471 | 2135  | 91  |               |
|                |   |                  | Atkinsonella hypoxylon partitivirus RNA 3      | NC_003472 | 1790  | N/A |               |
|                |   | Alphacryptovirus | White clover cryptic virus 1 RNA1              | NC_006275 | 1955  | 94  | S136-dsRNA-20 |
|                |   |                  | White clover cryptic virus 1 RNA2              | NC_006276 | 1708  | 85  |               |
| Chrysoviridae  | — | Chrysovirus      | Penicillium chrysogenum virus segment 1        | NC_007539 | 3562  | 94  | S137-dsRNA-21 |
|                |   |                  | Penicillium chrysogenum virus segment 2        | NC_007540 | 3200  | 92  |               |
|                |   |                  | Penicillium chrysogenum virus segment 3        | NC_007541 | 2976  | 92  |               |
|                |   |                  | Penicillium chrysogenum virus segment 4        | NC_007542 | 2902  | 87  |               |
| Hypoviridae    | — | Hypovirus        | Cryphonectria hypovirus 1                      | NC_001492 | 12734 | 89  | S138-dsRNA-22 |
| —              | — | Endornavirus     | Vicia faba endornavirus                        | NC_007648 | 17635 | 99  | S139-dsRNA-23 |

Additional file 1 Continued

|                  |                 |                   |                                                    |           |       |     |                 |
|------------------|-----------------|-------------------|----------------------------------------------------|-----------|-------|-----|-----------------|
| Bornaviridae     | —               | Bornavirus        | Borna disease virus                                | NC_001607 | 8910  | 97  | S140(-)ssRNA-1  |
| Rhabdoviridae    | —               | Vesiculovirus     | Vesicular stomatitis Indiana virus                 | NC_001560 | 11161 | 95  | S141(-)ssRNA-2  |
|                  |                 | Lyssavirus        | Rabies virus                                       | NC_001542 | 11932 | 91  | S142(-)ssRNA-3  |
|                  |                 | Ephemerovirus     | Bovine ephemeral fever virus                       | NC_002526 | 14900 | 95  | S143(-)ssRNA-4  |
|                  |                 | Cytorhabdovirus   | Lettuce necrotic yellows virus                     | NC_007642 | 12807 | 90  | S144(-)ssRNA-5  |
|                  |                 | Nucleorhabdovirus | Taro vein chlorosis virus                          | NC_006942 | 12020 | 95  | S145(-)ssRNA-6  |
|                  |                 | Novirhabdovirus   | Infectious hematopoietic necrosis virus            | NC_001652 | 11131 | 92  | S146(-)ssRNA-7  |
| Filoviridae      | —               | Marburgvirus      | Lake Victoria marburgvirus - Musoke                | NC_001608 | 19111 | 76  | S147(-)ssRNA-8  |
|                  |                 | Ebolavirus        | Zaire ebolavirus                                   | NC_002549 | 18959 | 76  | S148(-)ssRNA-9  |
| Paramyxoviridae  | Paramyxovirinae | Respirovirus      | Sendai virus                                       | NC_001552 | 15384 | 94  | S149(-)ssRNA-10 |
|                  |                 | Morbillivirus     | Measles virus                                      | NC_001498 | 15894 | 89  | S150(-)ssRNA-11 |
|                  |                 | Rubulavirus       | Mumps virus                                        | NC_002200 | 15384 | 92  | S151(-)ssRNA-12 |
|                  |                 | Henipavirus       | Hendra virus                                       | NC_001906 | 18234 | 82  | S152(-)ssRNA-13 |
|                  |                 | Avulavirus        | Newcastle disease virus B1                         | NC_002617 | 15186 | 90  | S153(-)ssRNA-14 |
|                  | Pneumovirinae   | Pneumovirus       | Human respiratory syncytial virus                  | NC_001781 | 15225 | 89  | S154(-)ssRNA-15 |
|                  |                 | Metapneumovirus   | Avian metapneumovirus                              | NC_007652 | 14071 | 92  | S155(-)ssRNA-16 |
| —                | —               | Varicosavirus     | Lettuce big-vein associated virus segment 1        | NC_011558 | 6797  | 90  | S156(-)ssRNA-17 |
|                  |                 |                   | Lettuce big-vein associated virus segment 2        | NC_011568 | 6081  | 76  |                 |
| —                | —               | Ophiovirus        | Citrus psorosis virus RNA1                         | NC_006314 | 8186  | 96  | S157(-)ssRNA-18 |
|                  |                 |                   | Citrus psorosis virus RNA2                         | NC_006315 | 1645  | 86  |                 |
|                  |                 |                   | Citrus psorosis virus RNA3                         | NC_006316 | 1447  | 91  |                 |
| Orthomyxoviridae | —               | Influenzavirus A  | Influenza A virus (A/Korea/426/68(H2N2)) segment 1 | NC_007378 | 2341  | 97  | S158(-)ssRNA-19 |
|                  |                 |                   | Influenza A virus (A/Korea/426/68(H2N2)) segment 2 | NC_007375 | 2341  | 97  |                 |
|                  |                 |                   | Influenza A virus (A/Korea/426/68(H2N2)) segment 3 | NC_007376 | 2233  | 96  |                 |
|                  |                 |                   | Influenza A virus (A/Korea/426/68(H2N2)) segment 4 | NC_007374 | 1773  | 95  |                 |
|                  |                 |                   | Influenza A virus (A/Korea/426/68(H2N2)) segment 5 | NC_007381 | 1497  | 100 |                 |
|                  |                 |                   | Influenza A virus (A/Korea/426/68(H2N2)) segment 6 | NC_007382 | 1410  | 100 |                 |
|                  |                 |                   | Influenza A virus (A/Korea/426/68(H2N2)) segment 7 | NC_007377 | 1027  | 95  |                 |
|                  |                 |                   | Influenza A virus (A/Korea/426/68(H2N2)) segment 8 | NC_007380 | 838   | 100 |                 |
|                  | —               | Influenzavirus C  | Influenza C virus (C/Ann Arbor/1/50) segment 1     | NC_006307 | 2325  | 100 | S159(-)ssRNA-20 |

Additional file 1 Continued

|              |   |                  |                                                |           |      |     |                  |
|--------------|---|------------------|------------------------------------------------|-----------|------|-----|------------------|
|              |   |                  | Influenza C virus (C/Ann Arbor/1/50) segment 2 | NC_006308 | 2265 | 100 |                  |
|              |   |                  | Influenza C virus (C/Ann Arbor/1/50) segment 3 | NC_006309 | 2130 | 100 |                  |
|              |   |                  | Influenza C virus (C/Ann Arbor/1/50) segment 4 | NC_006310 | 1968 | 100 |                  |
|              |   |                  | Influenza C virus (C/Ann Arbor/1/50) segment 5 | NC_006311 | 1807 | 93  |                  |
|              |   |                  | Influenza C virus (C/Ann Arbor/1/50) segment 6 | NC_006312 | 1125 | 100 |                  |
|              |   |                  | Influenza C virus (C/Ann Arbor/1/50) segment 7 | NC_006306 | 935  | 92  |                  |
|              | — | Thogotovirus     | Thogoto virus segment 1                        | NC_006508 | 2375 | 97  | S160-(-)ssRNA-21 |
|              |   |                  | Thogoto virus segment 2                        | NC_006495 | 2212 | 96  |                  |
|              |   |                  | Thogoto virus segment 3                        | NC_006496 | 1927 | 96  |                  |
|              |   |                  | Thogoto virus segment 4                        | NC_006506 | 1574 | 97  |                  |
|              |   |                  | Thogoto virus segment 5                        | NC_006507 | 1418 | 96  |                  |
|              |   |                  | Thogoto virus segment 6                        | NC_006504 | 955  | 95  |                  |
|              | — | Influenzavirus B | Influenza B virus RNA 1                        | NC_002204 | 2368 | 95  | S161-(-)ssRNA-22 |
|              |   |                  | Influenza B virus RNA 2                        | NC_002205 | 2313 | 100 |                  |
|              |   |                  | Influenza B virus RNA 3                        | NC_002206 | 2204 | 98  |                  |
|              |   |                  | Influenza B virus RNA 4                        | NC_002207 | 1882 | 93  |                  |
|              |   |                  | Influenza B virus RNA 5                        | NC_002208 | 1841 | 91  |                  |
|              |   |                  | Influenza B virus RNA 6                        | NC_002209 | 1557 | 90  |                  |
|              |   |                  | Influenza B virus RNA 7                        | NC_002210 | 1191 | 90  |                  |
|              |   |                  | Influenza B virus RNA 8                        | NC_002211 | 1096 | 93  |                  |
|              | — | Isavirus         | Infectious salmon anemia virus segment 1       | NC_006505 | 2169 | 100 | S162-(-)ssRNA-23 |
|              |   |                  | Infectious salmon anemia virus segment 2       | NC_006503 | 2185 | 97  |                  |
|              |   |                  | Infectious salmon anemia virus segment 3       | NC_006502 | 2046 | 90  |                  |
|              |   |                  | Infectious salmon anemia virus segment 4       | NC_006501 | 1787 | 97  |                  |
|              |   |                  | Infectious salmon anemia virus segment 5       | NC_006500 | 1504 | 88  |                  |
|              |   |                  | Infectious salmon anemia virus segment 6       | NC_006499 | 1323 | 89  |                  |
|              |   |                  | Infectious salmon anemia virus segment 7       | NC_006498 | 966  | 90  |                  |
|              |   |                  | Infectious salmon anemia virus segment 8       | NC_006497 | 736  | 95  |                  |
| Bunyaviridae | — | Orthobunyavirus  | Bunyamwera virus L segment                     | NC_001925 | 6875 | 97  | S163-(-)ssRNA24  |

|                 |   |               |                                              |           |       |    |                  |
|-----------------|---|---------------|----------------------------------------------|-----------|-------|----|------------------|
|                 |   |               | Bunyamwera virus M segment                   | NC_001926 | 4458  | 96 |                  |
|                 |   |               | Bunyamwera virus S segment                   | NC_001927 | 961   | 73 |                  |
|                 | — | Hantavirus    | Hantaan virus M                              | NC_005219 | 3616  | 94 | S164-(-)ssRNA-25 |
|                 |   |               | Hantaan virus L                              | NC_005222 | 6533  | 98 |                  |
|                 |   |               | Hantaan virus S                              | NC_005218 | 1696  | 76 |                  |
|                 | — | Nairovirus    | Dugbe virus segment L                        | NC_004159 | 12255 | 98 | S165-(-)ssRNA-26 |
|                 |   |               | Dugbe virus segment M                        | NC_004158 | 4888  | 95 |                  |
|                 |   |               | Dugbe virus segment S                        | NC_004157 | 1716  | 84 |                  |
|                 | — | Phlebovirus   | Rift Valley fever virus M                    | NC_014396 | 3885  | 92 | S166-(-)ssRNA-27 |
|                 |   |               | Rift Valley fever virus S                    | NC_014395 | 1690  | 90 |                  |
|                 |   |               | Rift Valley fever virus L                    | NC_014397 | 6404  | 98 |                  |
|                 | — | Tospovirus    | Tomato spotted wilt virus RNA L              | NC_002052 | 8897  | 96 | S167-(-)ssRNA-28 |
|                 |   |               | Tomato spotted wilt virus RNA M              | NC_002050 | 4821  | 74 |                  |
|                 |   |               | Tomato spotted wilt virus RNA S              | NC_002051 | 2916  | 86 |                  |
| —               | — | Tenuivirus    | Rice stripe virus RNA 1                      | NC_003755 | 8970  | 97 | S168-(-)ssRNA-29 |
|                 |   |               | Rice stripe virus RNA 2                      | NC_003754 | 3514  | 88 |                  |
|                 |   |               | Rice stripe virus RNA 3                      | NC_003776 | 2504  | 64 |                  |
|                 |   |               | Rice stripe virus RNA 4                      | NC_003753 | 2157  | 64 |                  |
| Arenaviridae    | — | Arenavirus    | Lymphocytic choriomeningitis virus segment L | NC_004291 | 6680  | 99 | S169-(-)ssRNA-30 |
|                 |   |               | Lymphocytic choriomeningitis virus segment S | NC_004294 | 3376  | 94 |                  |
| —               | — | Deltavirus    | Hepatitis delta virus                        | NC_001653 | 1682  | 59 | S170-(-)ssRNA-31 |
| Leviviridae     | — | Levivirus     | Enterobacteria phage MS2                     | NC_001417 | 3569  | 90 | S171-(+)ssRNA-1  |
|                 |   | Allolevivirus | Enterobacteria phage Qβ                      | NC_001890 | 4215  | 95 | S172-(+)ssRNA-2  |
| Narnaviridae    | — | Narnavirus    | Saccharomyces 20S RNA narnavirus             | NC_004051 | 2514  | 99 | S173-(+)ssRNA-3  |
|                 |   | Mitovirus     | Cryphonectria parasitica mitovirus 1-NB631   | NC_004046 | 2728  | 89 | S174-(+)ssRNA-4  |
| Picornaviridae  | — | Enterovirus   | Poliovirus                                   | NC_002058 | 7440  | 89 | S175-(+)ssRNA-5  |
|                 |   | Rhinovirus    | Human rhinovirus 89                          | NC_001617 | 7152  | 90 | S176-(+)ssRNA-6  |
|                 |   | Hepatovirus   | Hepatitis A virus                            | NC_001489 | 7478  | 89 | S177-(+)ssRNA-7  |
|                 |   | Cardiovirus   | Encephalomyocarditis virus                   | NC_001479 | 7835  | 87 | S178-(+)ssRNA-8  |
|                 |   | Aphthovirus   | Foot-and-mouth disease virus - type A        | NC_011450 | 8161  | 85 | S179-(+)ssRNA-9  |
|                 |   | Parechovirus  | Human parechovirus                           | NC_001897 | 7348  | 89 | S180-(+)ssRNA-10 |
|                 |   | Erbovirus     | Equine rhinitis B virus 1                    | NC_003983 | 8828  | 88 | S181-(+)ssRNA-11 |
|                 |   | Kobuvirus     | Aichi virus                                  | NC_001918 | 8251  | 88 | S182-(+)ssRNA-12 |
|                 |   | Teschovirus   | Porcine teschovirus 1                        | NC_003985 | 7117  | 94 | S183-(+)ssRNA-13 |
| —               | — | Iflavirus     | Infectious flacherie virus                   | NC_003781 | 9650  | 95 | S184-(+)ssRNA-14 |
| Dicistroviridae | — | Cripavirus    | Cricket paralysis virus                      | NC_003924 | 9185  | 87 | S185-(+)ssRNA-15 |
| Marnaviridae    | — | Marnavirus    | Heterosigma akashiwo RNA virus               | NC_005281 | 8587  | 90 | S186-(+)ssRNA-16 |
| Sequiviridae    | — | Sequivirus    | Parsnip yellow fleck virus                   | NC_003628 | 9871  | 92 | S187-(+)ssRNA-17 |
|                 |   | Waikavirus    | Rice tungro spherical virus                  | NC_001632 | 12226 | 85 | S188-(+)ssRNA-18 |

Additional file 1 Continued

|               |                      |                |                                           |           |                  |    |                  |
|---------------|----------------------|----------------|-------------------------------------------|-----------|------------------|----|------------------|
| —             | —                    | Sadwavirus     | Satsuma dwarf virus RNA 1                 | NC_003785 | 6794             | 91 | S189-(+)ssRNA-19 |
|               |                      |                | Satsuma dwarf virus RNA 2                 | NC_003786 | 5344             | 88 |                  |
| —             | —                    | Cheravirus     | Cherry rasp leaf virus                    | NC_006271 | 7034             | 96 | S190-(+)ssRNA-20 |
|               |                      |                | Cherry rasp leaf virus RNA 2              | NC_006272 | 3315             | 86 |                  |
| Comoviridae   | —                    | Comovirus      | Cowpea mosaic virus RNA 1                 | NC_003549 | 5889             | 95 | S191-(+)ssRNA-21 |
|               |                      |                | Cowpea mosaic virus RNA 2                 | NC_003550 | 3481             | 91 |                  |
|               |                      | Fabavirus      | Broad bean wilt virus 1 RNA 1             | NC_005289 | 5817             | 95 | S192-(+)ssRNA-22 |
|               |                      |                | Broad bean wilt virus 1 RNA 2             | NC_005290 | 3446             | 88 |                  |
|               |                      | Nepovirus      | Tobacco ringspot virus RNA 1              | NC_005097 | 7514             | 92 | S193-(+)ssRNA-23 |
|               |                      |                | Tobacco ringspot virus RNA 2              | NC_005096 | 3929             | 84 |                  |
| Potyviridae   | —                    | Potyvirus      | Potato virus Y                            | NC_001616 | 9704             | 94 | S194-(+)ssRNA-24 |
|               |                      | Rymovirus      | Ryegrass mosaic virus                     | NC_001814 | 9535             | 97 | S195-(+)ssRNA-25 |
|               |                      | Bymovirus      | Barley yellow mosaic virus RNA 1          | NC_002990 | 7637             | 94 | S196-(+)ssRNA-26 |
|               |                      |                | Barley yellow mosaic virus RNA 2          | NC_002991 | 3582             | 74 |                  |
|               |                      | Ipomovirus     | Sweet potato mild mottle virus            | NC_003797 | 10818            | 95 | S197-(+)ssRNA-27 |
|               |                      | Tritimovirus   | Wheat streak mosaic virus                 | NC_001886 | 9384             | 97 | S198-(+)ssRNA-28 |
| Caliciviridae | —                    | Vesivirus      | Vesicular exanthema of swine virus        | NC_002551 | 8284             | 97 | S199-(+)ssRNA-29 |
|               |                      | Lagovirus      | Rabbit hemorrhagic disease virus          | NC_001543 | 7437             | 99 | S200-(+)ssRNA-30 |
|               |                      | Norovirus      | Norwalk virus                             | NC_001959 | 7654             | 99 | S201-(+)ssRNA-31 |
|               |                      | Sapovirus      | Sapovirus C12                             | NC_006554 | 7476             | 98 | S202-(+)ssRNA-32 |
| —             | —                    | Hepevirus      | Hepatitis E virus                         | NC_001434 | 7176             | 98 | S203-(+)ssRNA-33 |
| Astroviridae  | —                    | Mamastrovirus  | Human astrovirus                          | NC_001943 | 6813             | 97 | S204-(+)ssRNA-34 |
|               |                      | Astrovirus     | Turkey astrovirus                         | NC_002470 | 7003             | 97 | S205-(+)ssRNA-35 |
| Nodaviridae   | —                    | Alphanodavirus | Nodamura virus RNA1                       | NC_002690 | 3204             | 97 | S206-(+)ssRNA-36 |
|               |                      |                | Nodamura virus RNA2                       | NC_002691 | 1336             | 89 |                  |
|               |                      | Betanodavirus  | Striped Jack nervous necrosis virus RNA 2 | NC_003449 | 1421             | 71 | S207-(+)ssRNA-37 |
|               |                      |                | Striped Jack nervous necrosis virus RNA 1 | NC_003448 | 3107             | 95 |                  |
| Tetraviridae  | —                    | Betatetravirus | Nudaurelia capensis $\beta$ virus         | NC_001990 | 6625             | 87 | S208-(+)ssRNA-38 |
| —             | —                    | Sobemovirus    | Southern bean mosaic virus                | NC_001625 | 4194             | 95 | S209-(+)ssRNA-39 |
| Luteoviridae  | —                    | Luteovirus     | Barley yellow dwarf virus - PAV           | NC_004750 | 5677             | 86 | S210-(+)ssRNA-40 |
|               |                      | Polerovirus    | Potato leafroll virus                     | NC_001747 | 5987             | 91 | S211-(+)ssRNA-41 |
|               |                      | Enamovirus     | Pea enation mosaic virus-1                | NC_003629 | 5706             | 89 | S212-(+)ssRNA-42 |
| Tombusviridae | —                    | Tombusvirus    | Tomato bushy stunt virus                  | NC_001554 | 4776             | 87 | S213-(+)ssRNA-43 |
|               |                      | Carmovirus     | Carnation mottle virus                    | NC_001265 | 4003             | 91 | S214-(+)ssRNA-44 |
|               |                      | Necrovirus     | Tobacco necrosis virus A                  | NC_001777 | 3684             | 96 | S215-(+)ssRNA-45 |
|               |                      | Dianthovirus   | Carnation ringspot virus RNA 1            | NC_003530 | 3840             | 95 | S216-(+)ssRNA-46 |
|               |                      |                | Carnation ringspot virus RNA 2            | NC_003531 | 1403             | 65 |                  |
|               |                      | Machlomovirus  | Maize chlorotic mottle virus              | NC_003627 | 4437             | 89 | S217-(+)ssRNA-47 |
|               |                      | Avenavirus     | Oat chlorotic stunt virus                 | NC_003633 | 4114             | 88 | S218-(+)ssRNA-48 |
|               |                      | Aureusvirus    | Pothos latent virus                       | NC_000939 | 4354             | 93 | S219-(+)ssRNA-49 |
| Panicovirus   | Panicum mosaic virus | NC_002598      | 4326                                      | 91        | S220-(+)ssRNA-50 |    |                  |

Additional file 1 Continued

|               |   |             |                                       |           |       |    |                  |
|---------------|---|-------------|---------------------------------------|-----------|-------|----|------------------|
| Arteriviridae | — | Arterivirus | Equine arteritis virus                | NC_002532 | 12704 | 97 | S221-(+)ssRNA-51 |
| Coronaviridae | — | Coronavirus | Avian infectious bronchitis virus     | NC_001451 | 27608 | 95 | S222-(+)ssRNA-52 |
|               |   | Torovirus   | Breda virus                           | NC_007447 | 28475 | 96 | S223-(+)ssRNA-53 |
| Roniviridae   | — | Okavirus    | Gill-associated virus                 | NC_010306 | 26253 | 97 | S224-(+)ssRNA-54 |
| Flaviviridae  | — | Flavivirus  | Yellow fever virus                    | NC_002031 | 10862 | 94 | S225-(+)ssRNA-55 |
|               |   | Pestivirus  | Bovine viral diarrhea virus 1         | NC_001461 | 12573 | 95 | S226-(+)ssRNA-56 |
|               |   | Hepacivirus | Hepatitis C virus genotype 1          | NC_004102 | 9646  | 93 | S227-(+)ssRNA-57 |
| Togaviridae   | — | Alphavirus  | Sindbis virus                         | NC_001547 | 11703 | 96 | S228-(+)ssRNA-58 |
|               |   | Rubivirus   | Rubella virus                         | NC_001545 | 9755  | 99 | S229-(+)ssRNA-59 |
| —             | — | Tobamovirus | Tobacco mosaic virus                  | NC_001367 | 6395  | 95 | S230-(+)ssRNA-60 |
| —             | — | Tobravirus  | Tobacco rattle virus RNA 1            | NC_003805 | 6791  | 92 | S231-(+)ssRNA-61 |
|               |   |             | Tobacco rattle virus RNA 2            | NC_003811 | 3855  | 66 |                  |
| —             | — | Hordeivirus | Barley stripe mosaic virus RNA 1      | NC_003469 | 3768  | 90 | S232-(+)ssRNA-62 |
|               |   |             | Barley stripe mosaic virus RNA 2      | NC_003481 | 3289  | 85 |                  |
|               |   |             | Barley stripe mosaic virus RNA 3      | NC_003478 | 3164  | 87 |                  |
| —             | — | Furovirus   | Soil-borne wheat mosaic virus RNA1    | NC_002041 | 7099  | 91 | S233-(+)ssRNA-63 |
|               |   |             | Soil-borne wheat mosaic virus RNA2    | NC_002042 | 3593  | 77 |                  |
| —             | — | Pomovirus   | Potato mop-top virus RNA 1            | NC_003723 | 6043  | 90 | S234-(+)ssRNA-64 |
|               |   |             | Potato mop-top virus RNA 2            | NC_003725 | 2964  | 77 |                  |
|               |   |             | Potato mop-top virus RNA 3            | NC_003724 | 3134  | 79 |                  |
| —             | — | Pecluvirus  | Peanut clump virus RNA 1              | NC_003672 | 5897  | 91 | S235-(+)ssRNA-65 |
|               |   |             | Peanut clump virus RNA 2              | NC_003668 | 4504  | 82 |                  |
| —             | — | Benyvirus   | Beet necrotic yellow vein virus RNA 1 | NC_003514 | 6746  | 93 | S236-(+)ssRNA-66 |
|               |   |             | Beet necrotic yellow vein virus RNA 2 | NC_003515 | 4609  | 92 |                  |
|               |   |             | Beet necrotic yellow vein virus RNA 3 | NC_003516 | 1774  | 37 |                  |
|               |   |             | Beet necrotic yellow vein virus RNA 4 | NC_003517 | 1465  | 57 |                  |
|               |   |             | Beet necrotic yellow vein virus RNA 5 | NC_003513 | 1320  | 52 |                  |
| Bromoviridae  | — | Alfamovirus | Alfalfa mosaic virus RNA 1            | NC_001495 | 3644  | 92 | S237-(+)ssRNA-67 |
|               |   |             | Alfalfa mosaic virus RNA 2            | NC_002024 | 2593  | 91 |                  |
|               |   |             | Alfalfa mosaic virus RNA 3            | NC_002025 | 2037  | 77 |                  |
|               |   | Ilarvirus   | Tobacco streak virus RNA 1            | NC_003844 | 3491  | 94 | S238-(+)ssRNA-68 |
|               |   |             | Tobacco streak virus RNA 2            | NC_003842 | 2926  | 93 |                  |
|               |   |             | Tobacco streak virus RNA 3            | NC_003845 | 2205  | 71 |                  |
|               |   | Bromovirus  | Brome mosaic virus RNA 1              | NC_002026 | 3234  | 89 | S239-(+)ssRNA-69 |
|               |   |             | Brome mosaic virus RNA 2              | NC_002027 | 2865  | 86 |                  |
|               |   |             | Brome mosaic virus RNA 3              | NC_002028 | 2111  | 70 |                  |

Additional file 1 Continued

|                 |   |               |                                        |           |       |    |                  |
|-----------------|---|---------------|----------------------------------------|-----------|-------|----|------------------|
|                 |   | Cucumovirus   | Cucumber mosaic virus RNA 1            | NC_002034 | 3357  | 88 | S240-(+)ssRNA-70 |
|                 |   |               | Cucumber mosaic virus RNA 2            | NC_002035 | 3050  | 87 |                  |
|                 |   |               | Cucumber mosaic virus RNA 3            | NC_001440 | 2216  | 67 |                  |
|                 |   | Oleavirus     | Olive latent virus 2 RNA 1             | NC_003673 | 3128  | 87 | S241-(+)ssRNA-71 |
|                 |   |               | Olive latent virus 2 RNA 2             | NC_003674 | 2735  | 86 |                  |
|                 |   |               | Olive latent virus 2 RNA 3             | NC_003671 | 2438  | 64 |                  |
| —               | — | Ourmiavirus   | Ourmia melon virus RNA 1               | NC_011068 | 2814  | 91 | S242-(+)ssRNA-72 |
|                 |   |               | Ourmia melon virus RNA 2               | NC_011069 | 1064  | 81 |                  |
|                 |   |               | Ourmia melon virus RNA 3               | NC_011070 | 974   | 64 |                  |
| —               | — | Idaeovirus    | Raspberry bushy dwarf virus RNA 1      | NC_003739 | 5449  | 93 | S243-(+)ssRNA-73 |
|                 |   |               | Raspberry bushy dwarf virus RNA 2      | NC_003740 | 2231  | 85 |                  |
| Tymoviridae     | — | Maculavirus   | Grapevine fleck virus                  | NC_003347 | 7564  | 92 | S244-(+)ssRNA-74 |
|                 |   | Tymovirus     | Turnip yellow mosaic virus             | NC_004063 | 6318  | 96 | S245-(+)ssRNA-75 |
|                 |   | Marafivirus   | Maize rayado fino virus                | NC_002786 | 6305  | 96 | S246-(+)ssRNA-76 |
| Closteroviridae | — | Closterovirus | Beet yellows virus                     | NC_001598 | 15480 | 97 | S247-(+)ssRNA-77 |
|                 |   | Crinivirus    | Lettuce infectious yellows virus RNA 1 | NC_003617 | 8118  | 96 | S248-(+)ssRNA-78 |
|                 |   |               | Lettuce infectious yellows virus RNA 2 | NC_003618 | 7193  | 83 |                  |
|                 |   | Ampelovirus   | Grapevine leafroll-associated virus 3  | NC_004667 | 17919 | 89 | S249-(+)ssRNA-79 |
| Flexiviridae    | — | Potexvirus    | Potato virus X                         | NC_011620 | 6435  | 96 | S250-(+)ssRNA-80 |
|                 |   | Mandarivirus  | Indian citrus ringspot virus           | NC_003093 | 7560  | 98 | S251-(+)ssRNA-81 |
|                 |   | Allexivirus   | Shallot virus X                        | NC_003795 | 8832  | 96 | S252-(+)ssRNA-82 |
|                 |   | Foveavirus    | Apple stem pitting virus               | NC_003462 | 9306  | 96 | S253-(+)ssRNA-83 |
|                 |   | Capillovirus  | Apple stem grooving virus              | NC_001749 | 6495  | 97 | S254-(+)ssRNA-84 |
|                 |   | Vitivirus     | Grapevine virus A                      | NC_003604 | 7351  | 97 | S255-(+)ssRNA-85 |
|                 |   | Trichovirus   | Apple chlorotic leaf spot virus        | NC_001409 | 7555  | 95 | S256-(+)ssRNA-86 |
| Barnaviridae    | — | Barnavirus    | Mushroom bacilliform virus             | NC_001633 | 4009  | 91 | S257-(+)ssRNA-87 |
