# Supplementary material for: Coevolution between simple sequence repeats (SSRs) and virus genome size
Source: PubMed Central journal article supplement (PMC3585866; doi:10.1186/1471-2164-13-435), 2012-08-30
Supplement: 1471-2164-13-435-S2.pdf [file 1471-2164-13-435-S2.pdf]

## Additional file 2 Occurrence of SSRs in analyzed virus genomes

| No. Type     | Genome size (bp) | Mono- | Di-  | Tri- | Tetra- | Penta- | Hexa- | Total |
|--------------|------------------|-------|------|------|--------|--------|-------|-------|
| S1-dsDNA-1   | 168903           | 191   | 211  | 67   | 1      | 1      | 1     | 472   |
| S2-dsDNA-2   | 94800            | 139   | 129  | 33   | 0      | 0      | 0     | 301   |
| S3-dsDNA-3   | 33593            | 73    | 61   | 15   | 1      | 0      | 0     | 150   |
| S4-dsDNA-4   | 36717            | 55    | 36   | 8    | 0      | 0      | 0     | 99    |
| S5-dsDNA-5   | 132562           | 149   | 255  | 37   | 0      | 0      | 0     | 441   |
| S6-dsDNA-6   | 48502            | 83    | 72   | 19   | 0      | 0      | 0     | 174   |
| S7-dsDNA-7   | 48836            | 66    | 63   | 16   | 1      | 0      | 0     | 146   |
| S8-dsDNA-8   | 121750           | 100   | 203  | 46   | 1      | 0      | 0     | 350   |
| S9-dsDNA-9   | 22172            | 64    | 37   | 15   | 1      | 0      | 0     | 117   |
| S10-dsDNA-10 | 52297            | 13    | 46   | 27   | 1      | 0      | 0     | 87    |
| S11-dsDNA-11 | 46375            | 72    | 59   | 18   | 0      | 1      | 0     | 150   |
| S12-dsDNA-12 | 41491            | 11    | 102  | 20   | 0      | 0      | 0     | 133   |
| S13-dsDNA-13 | 39937            | 1     | 62   | 12   | 0      | 0      | 0     | 75    |
| S14-dsDNA-14 | 19282            | 5     | 35   | 6    | 0      | 0      | 0     | 46    |
| S15-dsDNA-15 | 41724            | 46    | 53   | 21   | 0      | 0      | 0     | 120   |
| S16-dsDNA-16 | 70153            | 25    | 61   | 38   | 2      | 0      | 0     | 126   |
| S17-dsDNA-17 | 14927            | 15    | 4    | 8    | 0      | 0      | 0     | 27    |
| S18-dsDNA-18 | 10079            | 36    | 31   | 8    | 0      | 0      | 0     | 75    |
| S19-dsDNA-19 | 11965            | 21    | 18   | 3    | 0      | 0      | 0     | 42    |
| S20-dsDNA-20 | 40900            | 128   | 108  | 18   | 0      | 0      | 0     | 254   |
| S21-dsDNA-21 | 20869            | 44    | 64   | 7    | 1      | 0      | 0     | 116   |
| S22-dsDNA-22 | 35450            | 193   | 128  | 19   | 0      | 2      | 0     | 342   |
| S23-dsDNA-23 | 15465            | 20    | 36   | 3    | 0      | 0      | 0     | 59    |
| S24-dsDNA-24 | 14462            | 5     | 29   | 0    | 1      | 0      | 0     | 35    |
| S25-dsDNA-25 | 194711           | 495   | 676  | 108  | 5      | 1      | 2     | 1287  |
| S26-dsDNA-26 | 139962           | 50    | 858  | 173  | 20     | 0      | 2     | 1103  |
| S27-dsDNA-27 | 288539           | 724   | 988  | 169  | 10     | 1      | 0     | 1892  |
| S28-dsDNA-28 | 149955           | 1107  | 492  | 115  | 8      | 1      | 1     | 1724  |
| S29-dsDNA-29 | 161773           | 295   | 384  | 60   | 4      | 0      | 0     | 743   |
| S30-dsDNA-30 | 146454           | 536   | 752  | 120  | 8      | 1      | 3     | 1420  |
| S31-dsDNA-31 | 190289           | 123   | 1349 | 157  | 3      | 2      | 3     | 1637  |
| S32-dsDNA-32 | 134721           | 836   | 337  | 66   | 2      | 0      | 0     | 1241  |
| S33-dsDNA-33 | 232392           | 1383  | 1855 | 554  | 22     | 6      | 3     | 3823  |
| S34-dsDNA-34 | 170101           | 787   | 307  | 80   | 6      | 0      | 0     | 1180  |
| S35-dsDNA-35 | 212482           | 1054  | 417  | 186  | 7      | 2      | 1     | 1667  |
| S36-dsDNA-36 | 191100           | 286   | 220  | 122  | 6      | 1      | 1     | 636   |
| S37-dsDNA-37 | 105903           | 90    | 259  | 64   | 0      | 0      | 0     | 413   |
| S38-dsDNA-38 | 102653           | 405   | 205  | 62   | 1      | 2      | 2     | 677   |
| S39-dsDNA-39 | 111362           | 64    | 403  | 78   | 1      | 0      | 0     | 546   |

Additional file 2 Continued

|              |        |     |     |     |    |   |    |      |
|--------------|--------|-----|-----|-----|----|---|----|------|
| S40-dsDNA-40 | 330743 | 822 | 746 | 141 | 2  | 4 | 2  | 1717 |
| S41-dsDNA-41 | 335593 | 489 | 999 | 306 | 11 | 1 | 19 | 1825 |
| S42-dsDNA-42 | 407339 | 768 | 998 | 388 | 13 | 0 | 3  | 2170 |
| S43-dsDNA-43 | 133894 | 306 | 309 | 101 | 4  | 2 | 3  | 725  |
| S44-dsDNA-44 | 123500 | 206 | 436 | 148 | 9  | 1 | 1  | 801  |
| S45-dsDNA-45 | 305107 | 522 | 641 | 555 | 5  | 0 | 8  | 1731 |
| S46-dsDNA-46 | 134226 | 282 | 409 | 78  | 4  | 3 | 2  | 778  |
| S47-dsDNA-47 | 152261 | 663 | 468 | 161 | 19 | 4 | 4  | 1319 |
| S48-dsDNA-48 | 124884 | 283 | 315 | 39  | 5  | 2 | 1  | 645  |
| S49-dsDNA-49 | 177874 | 348 | 442 | 56  | 5  | 2 | 26 | 879  |
| S50-dsDNA-50 | 148687 | 245 | 366 | 60  | 3  | 0 | 0  | 674  |
| S51-dsDNA-51 | 235646 | 343 | 685 | 296 | 2  | 0 | 0  | 1326 |
| S52-dsDNA-52 | 230278 | 239 | 680 | 355 | 18 | 0 | 5  | 1297 |
| S53-dsDNA-53 | 159322 | 497 | 430 | 58  | 1  | 0 | 27 | 1013 |
| S54-dsDNA-54 | 172764 | 420 | 334 | 132 | 5  | 0 | 0  | 891  |
| S55-dsDNA-55 | 112930 | 354 | 309 | 67  | 2  | 0 | 0  | 732  |
| S56-dsDNA-56 | 35937  | 68  | 95  | 42  | 0  | 0 | 1  | 206  |
| S57-dsDNA-57 | 43804  | 47  | 108 | 36  | 0  | 0 | 0  | 191  |
| S58-dsDNA-58 | 29576  | 112 | 45  | 11  | 0  | 0 | 0  | 168  |
| S59-dsDNA-59 | 26163  | 73  | 45  | 11  | 0  | 0 | 0  | 129  |
| S60-dsDNA-60 | 5243   | 21  | 6   | 4   | 0  | 0 | 0  | 31   |
| S61-dsDNA-61 | 7961   | 15  | 32  | 7   | 0  | 0 | 0  | 54   |
| S62-dsDNA-62 | 7746   | 16  | 18  | 3   | 0  | 0 | 0  | 37   |
| S63-dsDNA-63 | 7353   | 9   | 15  | 6   | 0  | 0 | 0  | 30   |
| S64-dsDNA-64 | 8095   | 13  | 15  | 1   | 0  | 0 | 0  | 29   |
| S65-dsDNA-65 | 7841   | 20  | 15  | 6   | 0  | 0 | 0  | 41   |
| S66-dsDNA-66 | 7610   | 27  | 14  | 5   | 0  | 0 | 0  | 46   |
| S67-dsDNA-67 | 7729   | 8   | 8   | 4   | 0  | 0 | 0  | 20   |
| S68-dsDNA-68 | 7304   | 6   | 16  | 3   | 0  | 0 | 0  | 25   |
| S69-dsDNA-69 | 7687   | 10  | 15  | 4   | 0  | 0 | 0  | 29   |
| S70-dsDNA-70 | 7868   | 17  | 10  | 4   | 0  | 0 | 0  | 31   |
| S71-dsDNA-71 | 8607   | 31  | 23  | 5   | 1  | 0 | 0  | 60   |
| S72-dsDNA-72 | 7815   | 11  | 18  | 4   | 0  | 0 | 0  | 33   |
| S73-dsDNA-73 | 7614   | 11  | 14  | 7   | 0  | 0 | 0  | 32   |
| S74-dsDNA-74 | 7276   | 11  | 14  | 7   | 0  | 0 | 0  | 32   |
| S75-dsDNA-75 | 7879   | 11  | 25  | 6   | 0  | 0 | 0  | 42   |
| S76-dsDNA-76 | 246734 | 469 | 495 | 114 | 17 | 3 | 1  | 1099 |
| S77-dsDNA-77 | 156922 | 78  | 354 | 121 | 6  | 0 | 0  | 559  |
| S78-ssDNA-1  | 6407   | 6   | 7   | 5   | 0  | 0 | 0  | 18   |
| S79-ssDNA-2  | 4491   | 16  | 16  | 5   | 0  | 0 | 0  | 37   |
| S80-ssDNA-3  | 5386   | 4   | 4   | 0   | 0  | 0 | 0  | 8    |
| S81-ssDNA-4  | 4421   | 15  | 8   | 1   | 0  | 0 | 0  | 24   |
| S82-ssDNA-5  | 4594   | 15  | 7   | 4   | 0  | 0 | 0  | 26   |

Additional file 2 Continued

|                 |       |    |    |    |   |   |   |     |
|-----------------|-------|----|----|----|---|---|---|-----|
| S83-ssDNA-6     | 4877  | 6  | 4  | 5  | 0 | 0 | 0 | 15  |
| S84-ssDNA-7     | 2690  | 3  | 5  | 2  | 0 | 0 | 0 | 10  |
| S85-ssDNA-8     | 2994  | 4  | 6  | 5  | 0 | 0 | 0 | 15  |
| S86-ssDNA-9     | 5232  | 4  | 11 | 2  | 0 | 0 | 0 | 17  |
| S87-ssDNA-10    | 2861  | 5  | 7  | 3  | 0 | 0 | 0 | 15  |
| S88-ssDNA-11    | 1758  | 4  | 2  | 2  | 1 | 0 | 0 | 9   |
| S89-ssDNA-12    | 2319  | 17 | 7  | 1  | 0 | 0 | 0 | 25  |
| S90-ssDNA-13    | 3852  | 22 | 13 | 6  | 0 | 0 | 0 | 41  |
| S91-ssDNA-14    | 8024  | 2  | 28 | 10 | 0 | 1 | 0 | 41  |
| S92-ssDNA-15    | 6396  | 7  | 19 | 9  | 0 | 0 | 0 | 35  |
| S93-ssDNA-16    | 5149  | 12 | 12 | 3  | 0 | 0 | 0 | 27  |
| S94-ssDNA-17    | 5594  | 16 | 14 | 2  | 0 | 0 | 0 | 32  |
| S95-ssDNA-18    | 4679  | 2  | 16 | 5  | 4 | 0 | 0 | 27  |
| S96-ssDNA-19    | 4801  | 7  | 17 | 6  | 0 | 0 | 0 | 30  |
| S97-ssDNA-20    | 5517  | 14 | 28 | 5  | 0 | 0 | 0 | 47  |
| S98-ssDNA-21    | 5908  | 7  | 11 | 8  | 0 | 0 | 0 | 26  |
| S99-ssDNA-22    | 5078  | 16 | 18 | 8  | 1 | 0 | 0 | 43  |
| S100-ssDNA-23   | 3776  | 9  | 11 | 4  | 0 | 0 | 0 | 24  |
| S101-ssDNA-24   | 5454  | 6  | 9  | 7  | 0 | 0 | 0 | 22  |
| S102-dsDNA-RT-1 | 3215  | 2  | 7  | 2  | 0 | 0 | 0 | 11  |
| S103-dsDNA-RT-2 | 3027  | 0  | 5  | 4  | 0 | 0 | 0 | 9   |
| S104-dsDNA-RT-3 | 8024  | 8  | 15 | 7  | 0 | 0 | 0 | 30  |
| S105-dsDNA-RT-4 | 8178  | 32 | 12 | 4  | 0 | 0 | 0 | 48  |
| S106-dsDNA-RT-5 | 8159  | 36 | 27 | 11 | 1 | 0 | 0 | 75  |
| S107-dsDNA-RT-6 | 8002  | 16 | 21 | 4  | 0 | 0 | 0 | 41  |
| S108-dsDNA-RT-7 | 7489  | 1  | 10 | 7  | 0 | 0 | 0 | 18  |
| S109-dsDNA-RT-8 | 7206  | 13 | 10 | 4  | 0 | 0 | 0 | 27  |
| S110-ssRNA-RT-1 | 8805  | 12 | 16 | 3  | 1 | 0 | 0 | 32  |
| S111-ssRNA-RT-2 | 8282  | 11 | 16 | 2  | 0 | 0 | 0 | 29  |
| S112-ssRNA-RT-3 | 7286  | 5  | 23 | 3  | 0 | 0 | 0 | 31  |
| S113-ssRNA-RT-4 | 8419  | 22 | 26 | 2  | 0 | 0 | 0 | 50  |
| S114-ssRNA-RT-5 | 9181  | 21 | 32 | 12 | 0 | 0 | 0 | 65  |
| S115-ssRNA-RT-6 | 12708 | 20 | 22 | 7  | 1 | 0 | 0 | 50  |
| S116-ssRNA-RT-7 | 13246 | 12 | 30 | 10 | 0 | 0 | 1 | 53  |
| S117-dsRNA-1    | 13385 | 4  | 29 | 5  | 0 | 0 | 0 | 38  |
| S118-dsRNA-2    | 23564 | 6  | 47 | 8  | 0 | 0 | 0 | 61  |
| S119-dsRNA-3    | 19208 | 21 | 45 | 11 | 0 | 0 | 0 | 77  |
| S120-dsRNA-4    | 17448 | 27 | 39 | 8  | 0 | 0 | 0 | 74  |
| S121-dsRNA-5    | 29174 | 16 | 63 | 16 | 1 | 0 | 0 | 96  |
| S122-dsRNA-6    | 23015 | 15 | 43 | 9  | 0 | 0 | 0 | 67  |
| S123-dsRNA-7    | 24732 | 1  | 64 | 7  | 0 | 0 | 0 | 72  |
| S124-dsRNA-8    | 29339 | 55 | 52 | 18 | 0 | 0 | 0 | 125 |
| S125-dsRNA-9    | 25709 | 16 | 47 | 13 | 0 | 0 | 0 | 76  |

## Additional file 2 Continued

|                 |       |    |    |    |   |   |   |     |
|-----------------|-------|----|----|----|---|---|---|-----|
| S126-dsRNA-10   | 26164 | 4  | 61 | 9  | 0 | 0 | 0 | 74  |
| S127-dsRNA-11   | 20682 | 5  | 30 | 10 | 0 | 0 | 0 | 45  |
| S128-dsRNA-12   | 23433 | 4  | 46 | 8  | 1 | 0 | 0 | 59  |
| S129-dsRNA-13   | 5881  | 5  | 13 | 3  | 0 | 0 | 0 | 21  |
| S130-dsRNA-14   | 5898  | 1  | 10 | 2  | 0 | 0 | 0 | 13  |
| S131-dsRNA-15   | 6603  | 7  | 10 | 1  | 0 | 0 | 0 | 18  |
| S132-dsRNA-16   | 4579  | 1  | 9  | 1  | 0 | 0 | 0 | 11  |
| S133-dsRNA-17   | 6277  | 7  | 12 | 2  | 0 | 0 | 0 | 21  |
| S134-dsRNA-18   | 5284  | 6  | 14 | 3  | 0 | 0 | 0 | 23  |
| S135-dsRNA-19   | 6105  | 10 | 12 | 3  | 0 | 0 | 0 | 25  |
| S136-dsRNA-20   | 3663  | 2  | 8  | 1  | 0 | 0 | 0 | 11  |
| S137-dsRNA-21   | 12640 | 17 | 23 | 15 | 0 | 0 | 0 | 55  |
| S138-dsRNA-22   | 12734 | 2  | 18 | 5  | 0 | 0 | 0 | 25  |
| S139-dsRNA-23   | 17635 | 23 | 41 | 9  | 0 | 0 | 0 | 73  |
| S140(-)ssRNA-1  | 8910  | 10 | 17 | 2  | 0 | 0 | 0 | 29  |
| S141(-)ssRNA-2  | 11161 | 19 | 25 | 3  | 0 | 0 | 0 | 47  |
| S142(-)ssRNA-3  | 11932 | 21 | 34 | 2  | 0 | 0 | 0 | 57  |
| S143(-)ssRNA-4  | 14900 | 41 | 37 | 8  | 1 | 0 | 0 | 87  |
| S144(-)ssRNA-5  | 12807 | 9  | 38 | 8  | 0 | 0 | 0 | 55  |
| S145(-)ssRNA-6  | 12020 | 6  | 28 | 9  | 0 | 0 | 0 | 43  |
| S146(-)ssRNA-7  | 11131 | 20 | 22 | 11 | 0 | 0 | 0 | 53  |
| S147(-)ssRNA-8  | 19111 | 23 | 37 | 3  | 0 | 0 | 0 | 63  |
| S148(-)ssRNA-9  | 18959 | 26 | 38 | 6  | 2 | 0 | 0 | 72  |
| S149(-)ssRNA-10 | 15384 | 5  | 38 | 4  | 0 | 0 | 0 | 47  |
| S150(-)ssRNA-11 | 15894 | 24 | 27 | 4  | 0 | 0 | 0 | 55  |
| S151(-)ssRNA-12 | 15384 | 20 | 39 | 1  | 0 | 0 | 0 | 60  |
| S152(-)ssRNA-13 | 18234 | 15 | 44 | 9  | 0 | 0 | 0 | 68  |
| S153(-)ssRNA-14 | 15186 | 22 | 37 | 4  | 0 | 0 | 0 | 63  |
| S154(-)ssRNA-15 | 15225 | 37 | 38 | 5  | 0 | 0 | 0 | 80  |
| S155(-)ssRNA-16 | 14071 | 27 | 44 | 10 | 0 | 0 | 0 | 81  |
| S156(-)ssRNA-17 | 12878 | 17 | 49 | 8  | 0 | 0 | 0 | 74  |
| S157(-)ssRNA-18 | 11278 | 31 | 32 | 9  | 0 | 0 | 0 | 72  |
| S158(-)ssRNA-19 | 13460 | 8  | 39 | 6  | 0 | 0 | 0 | 53  |
| S159(-)ssRNA-20 | 12555 | 20 | 30 | 6  | 0 | 0 | 0 | 56  |
| S160(-)ssRNA-21 | 10461 | 9  | 37 | 4  | 0 | 0 | 0 | 50  |
| S161(-)ssRNA-22 | 14452 | 15 | 22 | 9  | 1 | 0 | 0 | 47  |
| S162(-)ssRNA-23 | 12716 | 7  | 34 | 10 | 1 | 0 | 0 | 52  |
| S163(-)ssRNA-24 | 12294 | 17 | 37 | 11 | 1 | 0 | 0 | 66  |
| S164(-)ssRNA-25 | 11845 | 19 | 34 | 15 | 1 | 0 | 0 | 69  |
| S165(-)ssRNA-26 | 18859 | 40 | 38 | 9  | 0 | 0 | 0 | 87  |
| S166(-)ssRNA-27 | 11979 | 8  | 36 | 13 | 0 | 0 | 0 | 57  |
| S167(-)ssRNA-28 | 16634 | 59 | 37 | 8  | 0 | 2 | 0 | 106 |
| S168(-)ssRNA-29 | 17145 | 28 | 62 | 6  | 0 | 0 | 0 | 96  |

## Additional file 2 Continued

|                  |       |    |    |   |   |   |   |    |
|------------------|-------|----|----|---|---|---|---|----|
| S169-(-)ssRNA-30 | 10056 | 10 | 18 | 1 | 0 | 0 | 0 | 29 |
| S170-(-)ssRNA-31 | 1682  | 6  | 5  | 1 | 0 | 0 | 0 | 12 |
| S171-(+)ssRNA-1  | 3569  | 2  | 6  | 0 | 0 | 0 | 0 | 8  |
| S172-(+)ssRNA-2  | 4215  | 2  | 4  | 2 | 0 | 0 | 0 | 8  |
| S173-(+)ssRNA-3  | 2514  | 3  | 3  | 1 | 0 | 0 | 0 | 7  |
| S174-(+)ssRNA-4  | 2728  | 0  | 7  | 0 | 0 | 0 | 0 | 7  |
| S175-(+)ssRNA-5  | 7440  | 3  | 15 | 3 | 0 | 0 | 0 | 21 |
| S176-(+)ssRNA-6  | 7152  | 2  | 23 | 1 | 0 | 0 | 0 | 26 |
| S177-(+)ssRNA-7  | 7478  | 9  | 9  | 4 | 0 | 0 | 0 | 22 |
| S178-(+)ssRNA-8  | 7835  | 8  | 18 | 4 | 0 | 0 | 0 | 30 |
| S179-(+)ssRNA-9  | 8161  | 2  | 23 | 3 | 0 | 0 | 0 | 28 |
| S180-(+)ssRNA-10 | 7348  | 6  | 12 | 0 | 0 | 0 | 0 | 18 |
| S181-(+)ssRNA-11 | 8828  | 3  | 16 | 1 | 0 | 0 | 0 | 20 |
| S182-(+)ssRNA-12 | 8251  | 16 | 23 | 2 | 3 | 0 | 0 | 44 |
| S183-(+)ssRNA-13 | 7117  | 2  | 16 | 2 | 0 | 0 | 0 | 20 |
| S184-(+)ssRNA-14 | 9650  | 11 | 25 | 3 | 0 | 0 | 0 | 39 |
| S185-(+)ssRNA-15 | 9185  | 4  | 26 | 6 | 0 | 0 | 0 | 36 |
| S186-(+)ssRNA-16 | 8587  | 6  | 16 | 4 | 0 | 0 | 0 | 26 |
| S187-(+)ssRNA-17 | 9871  | 4  | 28 | 3 | 0 | 0 | 0 | 35 |
| S188-(+)ssRNA-18 | 12226 | 3  | 32 | 1 | 0 | 0 | 0 | 36 |
| S189-(+)ssRNA-19 | 12138 | 11 | 39 | 7 | 0 | 0 | 0 | 57 |
| S190-(+)ssRNA-20 | 10349 | 12 | 29 | 5 | 0 | 0 | 0 | 46 |
| S191-(+)ssRNA-21 | 9370  | 2  | 18 | 3 | 0 | 0 | 0 | 23 |
| S192-(+)ssRNA-22 | 9263  | 9  | 23 | 1 | 0 | 0 | 0 | 33 |
| S193-(+)ssRNA-23 | 11443 | 8  | 30 | 3 | 2 | 0 | 0 | 43 |
| S194-(+)ssRNA-24 | 9704  | 1  | 32 | 2 | 0 | 0 | 1 | 36 |
| S195-(+)ssRNA-25 | 9535  | 1  | 21 | 3 | 0 | 0 | 0 | 25 |
| S196-(+)ssRNA-26 | 11219 | 4  | 34 | 8 | 0 | 2 | 0 | 48 |
| S197-(+)ssRNA-27 | 10818 | 6  | 16 | 5 | 0 | 0 | 0 | 27 |
| S198-(+)ssRNA-28 | 9384  | 1  | 16 | 2 | 0 | 0 | 0 | 19 |
| S199-(+)ssRNA-29 | 8284  | 5  | 12 | 1 | 0 | 0 | 0 | 18 |
| S200-(+)ssRNA-30 | 7437  | 1  | 15 | 1 | 0 | 0 | 0 | 17 |
| S201-(+)ssRNA-31 | 7654  | 8  | 15 | 5 | 0 | 0 | 0 | 28 |
| S202-(+)ssRNA-32 | 7476  | 3  | 17 | 2 | 1 | 0 | 0 | 23 |
| S203-(+)ssRNA-33 | 7176  | 5  | 11 | 6 | 0 | 0 | 0 | 22 |
| S204-(+)ssRNA-34 | 6813  | 9  | 13 | 3 | 0 | 0 | 0 | 25 |
| S205-(+)ssRNA-35 | 7003  | 11 | 19 | 4 | 0 | 0 | 0 | 34 |
| S206-(+)ssRNA-36 | 4540  | 0  | 3  | 1 | 0 | 0 | 0 | 4  |
| S207-(+)ssRNA-37 | 4528  | 1  | 5  | 2 | 0 | 0 | 0 | 8  |
| S208-(+)ssRNA-38 | 6625  | 5  | 10 | 5 | 0 | 0 | 0 | 20 |
| S209-(+)ssRNA-39 | 4194  | 2  | 11 | 2 | 0 | 0 | 0 | 15 |
| S210-(+)ssRNA-40 | 5677  | 5  | 13 | 3 | 1 | 0 | 0 | 22 |
| S211-(+)ssRNA-41 | 5987  | 1  | 10 | 3 | 0 | 0 | 0 | 14 |

## Additional file 2 Continued

|                  |       |    |    |    |   |   |   |     |
|------------------|-------|----|----|----|---|---|---|-----|
| S212-(+)ssRNA-42 | 5706  | 5  | 5  | 2  | 0 | 0 | 0 | 12  |
| S213-(+)ssRNA-43 | 4776  | 2  | 15 | 1  | 0 | 0 | 0 | 18  |
| S214-(+)ssRNA-44 | 4003  | 4  | 12 | 0  | 0 | 0 | 0 | 16  |
| S215-(+)ssRNA-45 | 3684  | 4  | 5  | 4  | 0 | 0 | 0 | 13  |
| S216-(+)ssRNA-46 | 5243  | 1  | 9  | 0  | 0 | 0 | 0 | 10  |
| S217-(+)ssRNA-47 | 4437  | 2  | 13 | 1  | 0 | 0 | 0 | 16  |
| S218-(+)ssRNA-48 | 4114  | 1  | 10 | 0  | 0 | 0 | 0 | 11  |
| S219-(+)ssRNA-49 | 4354  | 4  | 10 | 3  | 0 | 0 | 0 | 17  |
| S220-(+)ssRNA-50 | 4326  | 4  | 9  | 3  | 0 | 0 | 0 | 16  |
| S221-(+)ssRNA-51 | 12704 | 1  | 28 | 11 | 0 | 0 | 0 | 40  |
| S222-(+)ssRNA-52 | 27608 | 10 | 66 | 14 | 0 | 0 | 0 | 90  |
| S223-(+)ssRNA-53 | 28475 | 39 | 49 | 14 | 0 | 0 | 0 | 102 |
| S224-(+)ssRNA-54 | 26253 | 4  | 93 | 14 | 0 | 0 | 0 | 111 |
| S225-(+)ssRNA-55 | 10862 | 10 | 29 | 5  | 0 | 0 | 0 | 44  |
| S226-(+)ssRNA-56 | 12573 | 19 | 31 | 10 | 0 | 0 | 0 | 60  |
| S227-(+)ssRNA-57 | 9646  | 20 | 16 | 4  | 0 | 0 | 0 | 40  |
| S228-(+)ssRNA-58 | 11703 | 8  | 17 | 5  | 1 | 0 | 0 | 31  |
| S229-(+)ssRNA-59 | 9755  | 15 | 47 | 9  | 0 | 0 | 0 | 71  |
| S230-(+)ssRNA-60 | 6395  | 8  | 21 | 3  | 0 | 0 | 0 | 32  |
| S231-(+)ssRNA-61 | 10646 | 9  | 25 | 7  | 0 | 0 | 0 | 41  |
| S232-(+)ssRNA-62 | 10221 | 6  | 15 | 7  | 0 | 0 | 0 | 28  |
| S233-(+)ssRNA-63 | 10692 | 10 | 23 | 10 | 0 | 0 | 0 | 43  |
| S234-(+)ssRNA-64 | 12141 | 22 | 23 | 9  | 0 | 0 | 0 | 54  |
| S235-(+)ssRNA-65 | 10401 | 11 | 33 | 11 | 0 | 0 | 0 | 55  |
| S236-(+)ssRNA-66 | 15914 | 4  | 33 | 17 | 0 | 0 | 1 | 55  |
| S237-(+)ssRNA-67 | 8274  | 6  | 16 | 2  | 0 | 0 | 0 | 24  |
| S238-(+)ssRNA-68 | 8622  | 4  | 24 | 2  | 0 | 0 | 0 | 30  |
| S239-(+)ssRNA-69 | 8210  | 3  | 24 | 6  | 0 | 0 | 0 | 33  |
| S240-(+)ssRNA-70 | 8623  | 4  | 22 | 5  | 0 | 0 | 0 | 31  |
| S241-(+)ssRNA-71 | 8301  | 10 | 13 | 3  | 0 | 0 | 0 | 26  |
| S242-(+)ssRNA-72 | 4852  | 3  | 5  | 3  | 0 | 0 | 0 | 11  |
| S243-(+)ssRNA-73 | 7680  | 3  | 21 | 2  | 0 | 0 | 0 | 26  |
| S244-(+)ssRNA-74 | 7564  | 33 | 10 | 11 | 0 | 0 | 0 | 54  |
| S245-(+)ssRNA-75 | 6318  | 8  | 10 | 1  | 0 | 0 | 0 | 19  |
| S246-(+)ssRNA-76 | 6305  | 4  | 12 | 3  | 0 | 0 | 0 | 19  |
| S247-(+)ssRNA-77 | 15480 | 12 | 32 | 6  | 0 | 0 | 0 | 50  |
| S248-(+)ssRNA-78 | 15311 | 11 | 36 | 7  | 1 | 0 | 0 | 55  |
| S249-(+)ssRNA-79 | 17919 | 16 | 34 | 8  | 0 | 0 | 0 | 58  |
| S250-(+)ssRNA-80 | 6435  | 1  | 13 | 4  | 0 | 0 | 0 | 18  |
| S251-(+)ssRNA-81 | 7560  | 1  | 29 | 6  | 1 | 0 | 0 | 37  |
| S252-(+)ssRNA-82 | 8832  | 2  | 20 | 0  | 0 | 0 | 0 | 22  |
| S253-(+)ssRNA-83 | 9306  | 5  | 20 | 4  | 0 | 0 | 0 | 29  |
| S254-(+)ssRNA-84 | 6495  | 11 | 10 | 1  | 1 | 0 | 0 | 23  |

Additional file 2 Continued

|                  |      |   |    |   |   |   |   |    |
|------------------|------|---|----|---|---|---|---|----|
| S255-(+)ssRNA-85 | 7351 | 1 | 14 | 2 | 0 | 0 | 0 | 17 |
| S256-(+)ssRNA-86 | 7555 | 9 | 19 | 3 | 0 | 0 | 0 | 31 |
| S257-(+)ssRNA-87 | 4009 | 2 | 4  | 3 | 0 | 0 | 0 | 9  |
