# Supplementary material for: Coevolution between simple sequence repeats (SSRs) and virus genome size
Source: PubMed Central journal article supplement (PMC3585866; doi:10.1186/1471-2164-13-435), 2012-08-30
Supplement: 1471-2164-13-435-S3.pdf [file 1471-2164-13-435-S3.pdf]

### Additional file 3 Length (bp) of SSRs in analyzed virus genomes

| No. Type     | Genome size (bp) | Mono- | Di-   | Tri- | Tetra- | Penta- | Hexa- | Total | % (Total SSRs) |
|--------------|------------------|-------|-------|------|--------|--------|-------|-------|----------------|
| S1-dsDNA-1   | 168903           | 1154  | 1270  | 603  | 12     | 15     | 18    | 3072  | 1.82           |
| S2-dsDNA-2   | 94800            | 871   | 796   | 300  | 0      | 0      | 0     | 1967  | 2.07           |
| S3-dsDNA-3   | 33593            | 459   | 370   | 135  | 12     | 0      | 0     | 976   | 2.91           |
| S4-dsDNA-4   | 36717            | 338   | 222   | 72   | 0      | 0      | 0     | 632   | 1.72           |
| S5-dsDNA-5   | 132562           | 977   | 1568  | 333  | 0      | 0      | 0     | 2878  | 2.17           |
| S6-dsDNA-6   | 48502            | 517   | 440   | 174  | 0      | 0      | 0     | 1131  | 2.33           |
| S7-dsDNA-7   | 48836            | 416   | 390   | 144  | 12     | 0      | 0     | 962   | 1.97           |
| S8-dsDNA-8   | 121750           | 601   | 1228  | 417  | 12     | 0      | 0     | 2258  | 1.85           |
| S9-dsDNA-9   | 22172            | 411   | 224   | 141  | 12     | 0      | 0     | 788   | 3.55           |
| S10-dsDNA-10 | 52297            | 80    | 284   | 249  | 12     | 0      | 0     | 625   | 1.20           |
| S11-dsDNA-11 | 46375            | 456   | 356   | 165  | 0      | 15     | 0     | 992   | 2.14           |
| S12-dsDNA-12 | 41491            | 67    | 620   | 186  | 0      | 0      | 0     | 873   | 2.10           |
| S13-dsDNA-13 | 39937            | 6     | 376   | 108  | 0      | 0      | 0     | 490   | 1.23           |
| S14-dsDNA-14 | 19282            | 30    | 210   | 54   | 0      | 0      | 0     | 294   | 1.52           |
| S15-dsDNA-15 | 41724            | 291   | 332   | 189  | 0      | 0      | 0     | 812   | 1.95           |
| S16-dsDNA-16 | 70153            | 158   | 366   | 342  | 24     | 0      | 0     | 890   | 1.27           |
| S17-dsDNA-17 | 14927            | 94    | 24    | 78   | 0      | 0      | 0     | 196   | 1.31           |
| S18-dsDNA-18 | 10079            | 230   | 188   | 72   | 0      | 0      | 0     | 490   | 4.86           |
| S19-dsDNA-19 | 11965            | 136   | 116   | 27   | 0      | 0      | 0     | 279   | 2.33           |
| S20-dsDNA-20 | 40900            | 822   | 672   | 165  | 0      | 0      | 0     | 1659  | 4.06           |
| S21-dsDNA-21 | 20869            | 278   | 396   | 63   | 12     | 0      | 0     | 749   | 3.59           |
| S22-dsDNA-22 | 35450            | 1261  | 792   | 174  | 0      | 30     | 0     | 2257  | 6.37           |
| S23-dsDNA-23 | 15465            | 123   | 230   | 27   | 0      | 0      | 0     | 380   | 2.46           |
| S24-dsDNA-24 | 14462            | 30    | 180   | 0    | 12     | 0      | 0     | 222   | 1.54           |
| S25-dsDNA-25 | 194711           | 3178  | 4144  | 990  | 60     | 15     | 36    | 8423  | 4.33           |
| S26-dsDNA-26 | 139962           | 313   | 5556  | 1572 | 248    | 0      | 36    | 7725  | 5.52           |
| S27-dsDNA-27 | 288539           | 4641  | 6146  | 1536 | 120    | 15     | 0     | 12458 | 4.32           |
| S28-dsDNA-28 | 149955           | 7502  | 3084  | 1065 | 96     | 15     | 18    | 11780 | 7.86           |
| S29-dsDNA-29 | 161773           | 1907  | 2368  | 564  | 48     | 0      | 0     | 4887  | 3.02           |
| S30-dsDNA-30 | 146454           | 3520  | 4776  | 1110 | 96     | 25     | 78    | 9605  | 6.56           |
| S31-dsDNA-31 | 190289           | 868   | 9472  | 1455 | 36     | 30     | 54    | 11915 | 6.26           |
| S32-dsDNA-32 | 134721           | 5585  | 2096  | 615  | 24     | 0      | 0     | 8320  | 6.18           |
| S33-dsDNA-33 | 232392           | 9293  | 11926 | 5202 | 264    | 90     | 54    | 26829 | 11.54          |
| S34-dsDNA-34 | 170101           | 5351  | 1888  | 732  | 72     | 0      | 0     | 8043  | 4.73           |
| S35-dsDNA-35 | 212482           | 6814  | 2588  | 1707 | 84     | 30     | 24    | 11247 | 5.29           |
| S36-dsDNA-36 | 191100           | 1818  | 1342  | 1116 | 72     | 15     | 18    | 4381  | 2.29           |
| S37-dsDNA-37 | 105903           | 585   | 1674  | 579  | 0      | 0      | 0     | 2838  | 2.68           |
| S38-dsDNA-38 | 102653           | 2590  | 1264  | 567  | 12     | 30     | 42    | 4505  | 4.39           |
| S39-dsDNA-39 | 111362           | 403   | 2508  | 759  | 12     | 0      | 0     | 3682  | 3.31           |

## Additional file 3 Continued

|              |        |      |      |      |     |    |      |       |      |
|--------------|--------|------|------|------|-----|----|------|-------|------|
| S40-dsDNA-40 | 330743 | 5386 | 4598 | 1296 | 56  | 60 | 36   | 11432 | 3.46 |
| S41-dsDNA-41 | 335593 | 3264 | 6276 | 3108 | 132 | 15 | 432  | 13227 | 3.94 |
| S42-dsDNA-42 | 407339 | 4851 | 6210 | 3642 | 156 | 0  | 54   | 14913 | 3.66 |
| S43-dsDNA-43 | 133894 | 1932 | 1902 | 981  | 48  | 30 | 54   | 4947  | 3.69 |
| S44-dsDNA-44 | 123500 | 1336 | 2706 | 1413 | 116 | 15 | 24   | 5610  | 4.54 |
| S45-dsDNA-45 | 305107 | 3299 | 3936 | 5892 | 64  | 0  | 144  | 13335 | 4.37 |
| S46-dsDNA-46 | 134226 | 1891 | 2766 | 759  | 48  | 45 | 54   | 5563  | 4.14 |
| S47-dsDNA-47 | 152261 | 4389 | 2970 | 1548 | 228 | 85 | 132  | 9352  | 6.14 |
| S48-dsDNA-48 | 124884 | 1902 | 1986 | 354  | 60  | 30 | 18   | 4350  | 3.48 |
| S49-dsDNA-49 | 177874 | 2477 | 2704 | 504  | 60  | 35 | 990  | 6770  | 3.81 |
| S50-dsDNA-50 | 148687 | 1575 | 2234 | 543  | 36  | 0  | 0    | 4388  | 2.95 |
| S51-dsDNA-51 | 235646 | 2340 | 4260 | 2763 | 28  | 0  | 0    | 9391  | 3.99 |
| S52-dsDNA-52 | 230278 | 1561 | 4256 | 3393 | 244 | 0  | 96   | 9550  | 4.15 |
| S53-dsDNA-53 | 159322 | 3364 | 2694 | 564  | 12  | 0  | 1158 | 7792  | 4.89 |
| S54-dsDNA-54 | 172764 | 2643 | 2072 | 1209 | 64  | 0  | 0    | 5988  | 3.47 |
| S55-dsDNA-55 | 112930 | 2267 | 1904 | 630  | 28  | 0  | 0    | 4829  | 4.28 |
| S56-dsDNA-56 | 35937  | 442  | 596  | 420  | 0   | 0  | 18   | 1476  | 4.11 |
| S57-dsDNA-57 | 43804  | 302  | 668  | 348  | 0   | 0  | 0    | 1318  | 3.01 |
| S58-dsDNA-58 | 29576  | 715  | 276  | 99   | 0   | 0  | 0    | 1090  | 3.69 |
| S59-dsDNA-59 | 26163  | 468  | 270  | 108  | 0   | 0  | 0    | 846   | 3.23 |
| S60-dsDNA-60 | 5243   | 133  | 36   | 45   | 0   | 0  | 0    | 214   | 4.08 |
| S61-dsDNA-61 | 7961   | 101  | 204  | 66   | 0   | 0  | 0    | 371   | 4.66 |
| S62-dsDNA-62 | 7746   | 104  | 118  | 36   | 0   | 0  | 0    | 258   | 3.33 |
| S63-dsDNA-63 | 7353   | 57   | 92   | 57   | 0   | 0  | 0    | 206   | 2.80 |
| S64-dsDNA-64 | 8095   | 89   | 92   | 9    | 0   | 0  | 0    | 190   | 2.35 |
| S65-dsDNA-65 | 7841   | 134  | 90   | 63   | 0   | 0  | 0    | 287   | 3.66 |
| S66-dsDNA-66 | 7610   | 175  | 86   | 48   | 0   | 0  | 0    | 309   | 4.06 |
| S67-dsDNA-67 | 7729   | 55   | 52   | 36   | 0   | 0  | 0    | 143   | 1.85 |
| S68-dsDNA-68 | 7304   | 36   | 102  | 27   | 0   | 0  | 0    | 165   | 2.26 |
| S69-dsDNA-69 | 7687   | 68   | 90   | 39   | 0   | 0  | 0    | 197   | 2.56 |
| S70-dsDNA-70 | 7868   | 112  | 60   | 39   | 0   | 0  | 0    | 211   | 2.68 |
| S71-dsDNA-71 | 8607   | 240  | 142  | 60   | 12  | 0  | 0    | 454   | 5.27 |
| S72-dsDNA-72 | 7815   | 73   | 110  | 36   | 0   | 0  | 0    | 219   | 2.80 |
| S73-dsDNA-73 | 7614   | 69   | 84   | 66   | 0   | 0  | 0    | 219   | 2.88 |
| S74-dsDNA-74 | 7276   | 71   | 86   | 69   | 0   | 0  | 0    | 226   | 3.11 |
| S75-dsDNA-75 | 7879   | 78   | 156  | 54   | 0   | 0  | 0    | 288   | 3.66 |
| S76-dsDNA-76 | 246734 | 3167 | 3076 | 1050 | 216 | 50 | 18   | 7577  | 3.07 |
| S77-dsDNA-77 | 156922 | 554  | 2238 | 1317 | 72  | 0  | 0    | 4181  | 2.66 |
| S78-ssDNA-1  | 6407   | 39   | 42   | 45   | 0   | 0  | 0    | 126   | 1.97 |
| S79-ssDNA-2  | 4491   | 109  | 102  | 45   | 0   | 0  | 0    | 256   | 5.70 |
| S80-ssDNA-3  | 5386   | 25   | 24   | 0    | 0   | 0  | 0    | 49    | 0.91 |
| S81-ssDNA-4  | 4421   | 100  | 50   | 9    | 0   | 0  | 0    | 159   | 3.60 |
| S82-ssDNA-5  | 4594   | 97   | 42   | 39   | 0   | 0  | 0    | 178   | 3.87 |

Additional file 3 Continued

|                 |       |     |     |     |    |    |    |     |      |
|-----------------|-------|-----|-----|-----|----|----|----|-----|------|
| S83-ssDNA-6     | 4877  | 44  | 26  | 45  | 0  | 0  | 0  | 115 | 2.36 |
| S84-ssDNA-7     | 2690  | 19  | 30  | 18  | 0  | 0  | 0  | 67  | 2.49 |
| S85-ssDNA-8     | 2994  | 25  | 36  | 45  | 0  | 0  | 0  | 106 | 3.54 |
| S86-ssDNA-9     | 5232  | 24  | 74  | 18  | 0  | 0  | 0  | 116 | 2.22 |
| S87-ssDNA-10    | 2861  | 30  | 42  | 27  | 0  | 0  | 0  | 99  | 3.46 |
| S88-ssDNA-11    | 1758  | 25  | 12  | 18  | 12 | 0  | 0  | 67  | 3.81 |
| S89-ssDNA-12    | 2319  | 115 | 42  | 9   | 0  | 0  | 0  | 166 | 7.16 |
| S90-ssDNA-13    | 3852  | 151 | 80  | 54  | 0  | 0  | 0  | 285 | 7.40 |
| S91-ssDNA-14    | 8024  | 14  | 190 | 93  | 0  | 15 | 0  | 312 | 3.89 |
| S92-ssDNA-15    | 6396  | 45  | 124 | 81  | 0  | 0  | 0  | 250 | 3.91 |
| S93-ssDNA-16    | 5149  | 76  | 76  | 27  | 0  | 0  | 0  | 179 | 3.48 |
| S94-ssDNA-17    | 5594  | 99  | 88  | 18  | 0  | 0  | 0  | 205 | 3.66 |
| S95-ssDNA-18    | 4679  | 12  | 98  | 48  | 48 | 0  | 0  | 206 | 4.40 |
| S96-ssDNA-19    | 4801  | 45  | 110 | 63  | 0  | 0  | 0  | 218 | 4.54 |
| S97-ssDNA-20    | 5517  | 89  | 174 | 45  | 0  | 0  | 0  | 308 | 5.58 |
| S98-ssDNA-21    | 5908  | 45  | 66  | 78  | 0  | 0  | 0  | 189 | 3.20 |
| S99-ssDNA-22    | 5078  | 100 | 108 | 72  | 12 | 0  | 0  | 292 | 5.75 |
| S100-ssDNA-23   | 3776  | 58  | 72  | 36  | 0  | 0  | 0  | 166 | 4.40 |
| S101-ssDNA-24   | 5454  | 39  | 56  | 75  | 0  | 0  | 0  | 170 | 3.12 |
| S102-dsDNA-RT-1 | 3215  | 12  | 42  | 18  | 0  | 0  | 0  | 72  | 2.24 |
| S103-dsDNA-RT-2 | 3027  | 0   | 32  | 36  | 0  | 0  | 0  | 68  | 2.25 |
| S104-dsDNA-RT-3 | 8024  | 49  | 96  | 63  | 0  | 0  | 0  | 208 | 2.59 |
| S105-dsDNA-RT-4 | 8178  | 193 | 72  | 36  | 0  | 0  | 0  | 301 | 3.68 |
| S106-dsDNA-RT-5 | 8159  | 219 | 174 | 102 | 12 | 0  | 0  | 507 | 6.21 |
| S107-dsDNA-RT-6 | 8002  | 96  | 138 | 36  | 0  | 0  | 0  | 270 | 3.37 |
| S108-dsDNA-RT-7 | 7489  | 6   | 60  | 63  | 0  | 0  | 0  | 129 | 1.72 |
| S109-dsDNA-RT-8 | 7206  | 78  | 62  | 36  | 0  | 0  | 0  | 176 | 2.44 |
| S110-ssRNA-RT-1 | 8805  | 72  | 100 | 30  | 12 | 0  | 0  | 214 | 2.43 |
| S111-ssRNA-RT-2 | 8282  | 69  | 100 | 18  | 0  | 0  | 0  | 187 | 2.26 |
| S112-ssRNA-RT-3 | 7286  | 30  | 142 | 30  | 0  | 0  | 0  | 202 | 2.77 |
| S113-ssRNA-RT-4 | 8419  | 146 | 164 | 18  | 0  | 0  | 0  | 328 | 3.90 |
| S114-ssRNA-RT-5 | 9181  | 127 | 202 | 111 | 0  | 0  | 0  | 440 | 4.79 |
| S115-ssRNA-RT-6 | 12708 | 124 | 146 | 72  | 12 | 0  | 0  | 354 | 2.79 |
| S116-ssRNA-RT-7 | 13246 | 72  | 182 | 90  | 0  | 0  | 18 | 362 | 2.73 |
| S117-dsRNA-1    | 13385 | 27  | 188 | 45  | 0  | 0  | 0  | 260 | 1.94 |
| S118-dsRNA-2    | 23564 | 38  | 292 | 72  | 0  | 0  | 0  | 402 | 1.71 |
| S119-dsRNA-3    | 19208 | 129 | 282 | 99  | 0  | 0  | 0  | 510 | 2.66 |
| S120-dsRNA-4    | 17448 | 165 | 246 | 72  | 0  | 0  | 0  | 483 | 2.77 |
| S121-dsRNA-5    | 29174 | 98  | 392 | 144 | 12 | 0  | 0  | 646 | 2.21 |
| S122-dsRNA-6    | 23015 | 96  | 258 | 81  | 0  | 0  | 0  | 435 | 1.89 |
| S123-dsRNA-7    | 24732 | 6   | 396 | 63  | 0  | 0  | 0  | 465 | 1.88 |
| S124-dsRNA-8    | 29339 | 336 | 322 | 162 | 0  | 0  | 0  | 820 | 2.79 |
| S125-dsRNA-9    | 25709 | 98  | 290 | 126 | 0  | 0  | 0  | 514 | 2.00 |

## Additional file 3 Continued

|                  |       |     |     |     |    |    |   |     |      |
|------------------|-------|-----|-----|-----|----|----|---|-----|------|
| S126-dsRNA-10    | 26164 | 25  | 378 | 84  | 0  | 0  | 0 | 487 | 1.86 |
| S127-dsRNA-11    | 20682 | 30  | 188 | 93  | 0  | 0  | 0 | 311 | 1.50 |
| S128-dsRNA-12    | 23433 | 28  | 282 | 72  | 12 | 0  | 0 | 394 | 1.68 |
| S129-dsRNA-13    | 5881  | 31  | 78  | 27  | 0  | 0  | 0 | 136 | 2.31 |
| S130-dsRNA-14    | 5898  | 6   | 60  | 18  | 0  | 0  | 0 | 84  | 1.42 |
| S131-dsRNA-15    | 6603  | 44  | 60  | 9   | 0  | 0  | 0 | 113 | 1.71 |
| S132-dsRNA-16    | 4579  | 7   | 54  | 9   | 0  | 0  | 0 | 70  | 1.53 |
| S133-dsRNA-17    | 6277  | 48  | 76  | 18  | 0  | 0  | 0 | 142 | 2.26 |
| S134-dsRNA-18    | 5284  | 36  | 86  | 27  | 0  | 0  | 0 | 149 | 2.82 |
| S135-dsRNA-19    | 6105  | 78  | 76  | 27  | 0  | 0  | 0 | 181 | 2.96 |
| S136-dsRNA-20    | 3663  | 14  | 48  | 12  | 0  | 0  | 0 | 74  | 2.02 |
| S137-dsRNA-21    | 12640 | 109 | 144 | 153 | 0  | 0  | 0 | 406 | 3.21 |
| S138-dsRNA-22    | 12734 | 29  | 108 | 45  | 0  | 0  | 0 | 182 | 1.43 |
| S139-dsRNA-23    | 17635 | 151 | 260 | 81  | 0  | 0  | 0 | 492 | 2.79 |
| S140-(-)ssRNA-1  | 8910  | 63  | 104 | 18  | 0  | 0  | 0 | 185 | 2.08 |
| S141-(-)ssRNA-2  | 11161 | 119 | 152 | 30  | 0  | 0  | 0 | 301 | 2.70 |
| S142-(-)ssRNA-3  | 11932 | 136 | 212 | 18  | 0  | 0  | 0 | 366 | 3.07 |
| S143-(-)ssRNA-4  | 14900 | 267 | 238 | 75  | 12 | 0  | 0 | 592 | 3.97 |
| S144-(-)ssRNA-5  | 12807 | 58  | 240 | 78  | 0  | 0  | 0 | 376 | 2.94 |
| S145-(-)ssRNA-6  | 12020 | 36  | 180 | 87  | 0  | 0  | 0 | 303 | 2.52 |
| S146-(-)ssRNA-7  | 11131 | 131 | 138 | 105 | 0  | 0  | 0 | 374 | 3.36 |
| S147-(-)ssRNA-8  | 19111 | 139 | 226 | 27  | 0  | 0  | 0 | 392 | 2.05 |
| S148-(-)ssRNA-9  | 18959 | 160 | 228 | 54  | 24 | 0  | 0 | 466 | 2.46 |
| S149-(-)ssRNA-10 | 15384 | 30  | 236 | 36  | 0  | 0  | 0 | 302 | 1.96 |
| S150-(-)ssRNA-11 | 15894 | 154 | 168 | 36  | 0  | 0  | 0 | 358 | 2.25 |
| S151-(-)ssRNA-12 | 15384 | 124 | 238 | 9   | 0  | 0  | 0 | 371 | 2.41 |
| S152-(-)ssRNA-13 | 18234 | 92  | 268 | 81  | 0  | 0  | 0 | 441 | 2.42 |
| S153-(-)ssRNA-14 | 15186 | 135 | 230 | 36  | 0  | 0  | 0 | 401 | 2.64 |
| S154-(-)ssRNA-15 | 15225 | 236 | 238 | 45  | 0  | 0  | 0 | 519 | 3.41 |
| S155-(-)ssRNA-16 | 14071 | 168 | 272 | 93  | 0  | 0  | 0 | 533 | 3.79 |
| S156-(-)ssRNA-17 | 12878 | 108 | 302 | 72  | 0  | 0  | 0 | 482 | 3.74 |
| S157-(-)ssRNA-18 | 11278 | 200 | 200 | 90  | 0  | 0  | 0 | 490 | 4.34 |
| S158-(-)ssRNA-19 | 13460 | 49  | 244 | 54  | 0  | 0  | 0 | 347 | 2.58 |
| S159-(-)ssRNA-20 | 12555 | 120 | 186 | 54  | 0  | 0  | 0 | 360 | 2.87 |
| S160-(-)ssRNA-21 | 10461 | 54  | 232 | 36  | 0  | 0  | 0 | 322 | 3.08 |
| S161-(-)ssRNA-22 | 14452 | 91  | 134 | 81  | 12 | 0  | 0 | 318 | 2.20 |
| S162-(-)ssRNA-23 | 12716 | 60  | 214 | 93  | 12 | 0  | 0 | 379 | 2.98 |
| S163-(-)ssRNA-24 | 12294 | 107 | 234 | 99  | 12 | 0  | 0 | 452 | 3.68 |
| S164-(-)ssRNA-25 | 11845 | 121 | 214 | 135 | 12 | 0  | 0 | 482 | 4.07 |
| S165-(-)ssRNA-26 | 18859 | 257 | 230 | 81  | 0  | 0  | 0 | 568 | 3.01 |
| S166-(-)ssRNA-27 | 11979 | 51  | 226 | 117 | 0  | 0  | 0 | 394 | 3.29 |
| S167-(-)ssRNA-28 | 16634 | 367 | 226 | 75  | 0  | 30 | 0 | 698 | 4.20 |
| S168-(-)ssRNA-29 | 17145 | 184 | 386 | 54  | 0  | 0  | 0 | 624 | 3.64 |

## Additional file 3 Continued

|                  |       |     |     |    |    |    |    |     |      |
|------------------|-------|-----|-----|----|----|----|----|-----|------|
| S169-(-)ssRNA-30 | 10056 | 61  | 110 | 9  | 0  | 0  | 0  | 180 | 1.79 |
| S170-(-)ssRNA-31 | 1682  | 36  | 32  | 9  | 0  | 0  | 0  | 77  | 4.58 |
| S171-(+)ssRNA-1  | 3569  | 12  | 36  | 0  | 0  | 0  | 0  | 48  | 1.34 |
| S172-(+)ssRNA-2  | 4215  | 12  | 26  | 18 | 0  | 0  | 0  | 56  | 1.33 |
| S173-(+)ssRNA-3  | 2514  | 18  | 22  | 9  | 0  | 0  | 0  | 49  | 1.95 |
| S174-(+)ssRNA-4  | 2728  | 0   | 42  | 0  | 0  | 0  | 0  | 42  | 1.54 |
| S175-(+)ssRNA-5  | 7440  | 20  | 92  | 27 | 0  | 0  | 0  | 139 | 1.87 |
| S176-(+)ssRNA-6  | 7152  | 12  | 148 | 9  | 0  | 0  | 0  | 169 | 2.36 |
| S177-(+)ssRNA-7  | 7478  | 54  | 54  | 36 | 0  | 0  | 0  | 144 | 1.93 |
| S178-(+)ssRNA-8  | 7835  | 161 | 110 | 36 | 0  | 0  | 0  | 307 | 3.92 |
| S179-(+)ssRNA-9  | 8161  | 27  | 142 | 27 | 0  | 0  | 0  | 196 | 2.40 |
| S180-(+)ssRNA-10 | 7348  | 49  | 76  | 0  | 0  | 0  | 0  | 125 | 1.70 |
| S181-(+)ssRNA-11 | 8828  | 18  | 100 | 9  | 0  | 0  | 0  | 127 | 1.44 |
| S182-(+)ssRNA-12 | 8251  | 100 | 148 | 18 | 36 | 0  | 0  | 302 | 3.66 |
| S183-(+)ssRNA-13 | 7117  | 20  | 96  | 18 | 0  | 0  | 0  | 134 | 1.88 |
| S184-(+)ssRNA-14 | 9650  | 70  | 156 | 27 | 0  | 0  | 0  | 253 | 2.62 |
| S185-(+)ssRNA-15 | 9185  | 25  | 158 | 60 | 0  | 0  | 0  | 243 | 2.65 |
| S186-(+)ssRNA-16 | 8587  | 41  | 98  | 36 | 0  | 0  | 0  | 175 | 2.04 |
| S187-(+)ssRNA-17 | 9871  | 26  | 176 | 30 | 0  | 0  | 0  | 232 | 2.35 |
| S188-(+)ssRNA-18 | 12226 | 65  | 196 | 9  | 0  | 0  | 0  | 270 | 2.21 |
| S189-(+)ssRNA-19 | 12138 | 66  | 246 | 63 | 0  | 0  | 0  | 375 | 3.09 |
| S190-(+)ssRNA-20 | 10349 | 73  | 178 | 57 | 0  | 0  | 0  | 308 | 2.98 |
| S191-(+)ssRNA-21 | 9370  | 12  | 118 | 30 | 0  | 0  | 0  | 160 | 1.71 |
| S192-(+)ssRNA-22 | 9263  | 54  | 142 | 9  | 0  | 0  | 0  | 205 | 2.21 |
| S193-(+)ssRNA-23 | 11443 | 52  | 182 | 27 | 24 | 0  | 0  | 285 | 2.49 |
| S194-(+)ssRNA-24 | 9704  | 7   | 196 | 18 | 0  | 0  | 18 | 239 | 2.46 |
| S195-(+)ssRNA-25 | 9535  | 6   | 126 | 27 | 0  | 0  | 0  | 159 | 1.67 |
| S196-(+)ssRNA-26 | 11219 | 25  | 206 | 72 | 0  | 40 | 0  | 343 | 3.06 |
| S197-(+)ssRNA-27 | 10818 | 37  | 96  | 45 | 0  | 0  | 0  | 178 | 1.65 |
| S198-(+)ssRNA-28 | 9384  | 6   | 96  | 18 | 0  | 0  | 0  | 120 | 1.28 |
| S199-(+)ssRNA-29 | 8284  | 36  | 74  | 9  | 0  | 0  | 0  | 119 | 1.44 |
| S200-(+)ssRNA-30 | 7437  | 6   | 90  | 9  | 0  | 0  | 0  | 105 | 1.41 |
| S201-(+)ssRNA-31 | 7654  | 50  | 92  | 45 | 0  | 0  | 0  | 187 | 2.44 |
| S202-(+)ssRNA-32 | 7476  | 18  | 104 | 18 | 12 | 0  | 0  | 152 | 2.03 |
| S203-(+)ssRNA-33 | 7176  | 32  | 68  | 57 | 0  | 0  | 0  | 157 | 2.19 |
| S204-(+)ssRNA-34 | 6813  | 57  | 82  | 27 | 0  | 0  | 0  | 166 | 2.44 |
| S205-(+)ssRNA-35 | 7003  | 70  | 116 | 36 | 0  | 0  | 0  | 222 | 3.17 |
| S206-(+)ssRNA-36 | 4540  | 0   | 18  | 9  | 0  | 0  | 0  | 27  | 0.59 |
| S207-(+)ssRNA-37 | 4528  | 8   | 30  | 18 | 0  | 0  | 0  | 56  | 1.24 |
| S208-(+)ssRNA-38 | 6625  | 30  | 60  | 51 | 0  | 0  | 0  | 141 | 2.13 |
| S209-(+)ssRNA-39 | 4194  | 12  | 68  | 18 | 0  | 0  | 0  | 98  | 2.34 |
| S210-(+)ssRNA-40 | 5677  | 32  | 78  | 27 | 12 | 0  | 0  | 149 | 2.62 |
| S211-(+)ssRNA-41 | 5987  | 6   | 64  | 27 | 0  | 0  | 0  | 97  | 1.62 |

## Additional file 3 Continued

|                  |       |     |     |     |    |   |    |     |      |
|------------------|-------|-----|-----|-----|----|---|----|-----|------|
| S212-(+)ssRNA-42 | 5706  | 33  | 32  | 18  | 0  | 0 | 0  | 83  | 1.45 |
| S213-(+)ssRNA-43 | 4776  | 12  | 94  | 9   | 0  | 0 | 0  | 115 | 2.41 |
| S214-(+)ssRNA-44 | 4003  | 27  | 74  | 0   | 0  | 0 | 0  | 101 | 2.52 |
| S215-(+)ssRNA-45 | 3684  | 26  | 30  | 42  | 0  | 0 | 0  | 98  | 2.66 |
| S216-(+)ssRNA-46 | 5243  | 6   | 54  | 0   | 0  | 0 | 0  | 60  | 1.14 |
| S217-(+)ssRNA-47 | 4437  | 6   | 86  | 9   | 0  | 0 | 0  | 113 | 2.55 |
| S218-(+)ssRNA-48 | 4114  | 18  | 62  | 0   | 0  | 0 | 0  | 68  | 1.65 |
| S219-(+)ssRNA-49 | 4354  | 24  | 62  | 27  | 0  | 0 | 0  | 113 | 2.60 |
| S220-(+)ssRNA-50 | 4326  | 27  | 54  | 27  | 0  | 0 | 0  | 108 | 2.50 |
| S221-(+)ssRNA-51 | 12704 | 7   | 174 | 99  | 0  | 0 | 0  | 280 | 2.20 |
| S222-(+)ssRNA-52 | 27608 | 61  | 410 | 126 | 0  | 0 | 0  | 597 | 2.16 |
| S223-(+)ssRNA-53 | 28475 | 249 | 308 | 126 | 0  | 0 | 0  | 683 | 2.40 |
| S224-(+)ssRNA-54 | 26253 | 36  | 586 | 132 | 0  | 0 | 0  | 754 | 2.87 |
| S225-(+)ssRNA-55 | 10862 | 60  | 180 | 45  | 0  | 0 | 0  | 285 | 2.62 |
| S226-(+)ssRNA-56 | 12573 | 115 | 194 | 93  | 0  | 0 | 0  | 402 | 3.20 |
| S227-(+)ssRNA-57 | 9646  | 199 | 98  | 36  | 0  | 0 | 0  | 333 | 3.45 |
| S228-(+)ssRNA-58 | 11703 | 49  | 102 | 45  | 12 | 0 | 0  | 208 | 1.78 |
| S229-(+)ssRNA-59 | 9755  | 97  | 298 | 90  | 0  | 0 | 0  | 485 | 4.97 |
| S230-(+)ssRNA-60 | 6395  | 48  | 130 | 30  | 0  | 0 | 0  | 208 | 3.25 |
| S231-(+)ssRNA-61 | 10646 | 54  | 156 | 66  | 0  | 0 | 0  | 276 | 2.59 |
| S232-(+)ssRNA-62 | 10221 | 81  | 96  | 63  | 0  | 0 | 0  | 240 | 2.35 |
| S233-(+)ssRNA-63 | 10692 | 63  | 150 | 96  | 0  | 0 | 0  | 309 | 2.89 |
| S234-(+)ssRNA-64 | 12141 | 142 | 140 | 87  | 0  | 0 | 0  | 369 | 3.04 |
| S235-(+)ssRNA-65 | 10401 | 67  | 204 | 102 | 0  | 0 | 0  | 373 | 3.59 |
| S236-(+)ssRNA-66 | 15914 | 24  | 206 | 162 | 0  | 0 | 18 | 410 | 2.58 |
| S237-(+)ssRNA-67 | 8274  | 39  | 98  | 18  | 0  | 0 | 0  | 155 | 1.87 |
| S238-(+)ssRNA-68 | 8622  | 24  | 146 | 18  | 0  | 0 | 0  | 188 | 2.18 |
| S239-(+)ssRNA-69 | 8210  | 28  | 148 | 57  | 0  | 0 | 0  | 233 | 2.84 |
| S240-(+)ssRNA-70 | 8623  | 25  | 142 | 45  | 0  | 0 | 0  | 212 | 2.46 |
| S241-(+)ssRNA-71 | 8301  | 74  | 80  | 27  | 0  | 0 | 0  | 181 | 2.18 |
| S242-(+)ssRNA-72 | 4852  | 19  | 30  | 30  | 0  | 0 | 0  | 79  | 1.63 |
| S243-(+)ssRNA-73 | 7680  | 19  | 130 | 18  | 0  | 0 | 0  | 167 | 2.17 |
| S244-(+)ssRNA-74 | 7564  | 248 | 60  | 105 | 0  | 0 | 0  | 413 | 5.46 |
| S245-(+)ssRNA-75 | 6318  | 56  | 60  | 9   | 0  | 0 | 0  | 125 | 1.98 |
| S246-(+)ssRNA-76 | 6305  | 25  | 72  | 27  | 0  | 0 | 0  | 124 | 1.97 |
| S247-(+)ssRNA-77 | 15480 | 72  | 200 | 57  | 0  | 0 | 0  | 329 | 2.13 |
| S248-(+)ssRNA-78 | 15311 | 67  | 220 | 66  | 12 | 0 | 0  | 365 | 2.38 |
| S249-(+)ssRNA-79 | 17919 | 96  | 208 | 72  | 0  | 0 | 0  | 376 | 2.10 |
| S250-(+)ssRNA-80 | 6435  | 6   | 78  | 36  | 0  | 0 | 0  | 120 | 1.86 |
| S251-(+)ssRNA-81 | 7560  | 7   | 174 | 54  | 12 | 0 | 0  | 247 | 3.27 |
| S252-(+)ssRNA-82 | 8832  | 14  | 126 | 0   | 0  | 0 | 0  | 140 | 1.59 |
| S253-(+)ssRNA-83 | 9306  | 31  | 124 | 36  | 0  | 0 | 0  | 191 | 2.05 |
| S254-(+)ssRNA-84 | 6495  | 69  | 60  | 9   | 12 | 0 | 0  | 150 | 2.31 |

Additional file 3 Continued

|                  |      |    |     |    |   |   |   |     |      |
|------------------|------|----|-----|----|---|---|---|-----|------|
| S255-(+)ssRNA-85 | 7351 | 6  | 88  | 18 | 0 | 0 | 0 | 112 | 1.52 |
| S256-(+)ssRNA-86 | 7555 | 59 | 114 | 27 | 0 | 0 | 0 | 200 | 2.65 |
| S257-(+)ssRNA-87 | 4009 | 13 | 24  | 27 | 0 | 0 | 0 | 64  | 1.60 |
