# Supplementary material for: Coevolution between simple sequence repeats (SSRs) and virus genome size
Source: PubMed Central journal article supplement (PMC3585866; doi:10.1186/1471-2164-13-435), 2012-08-30
Supplement: 1471-2164-13-435-S4.pdf [file 1471-2164-13-435-S4.pdf]

### Additional file 4 Relative abundance of SSRs in analyzed virus genomes

| No. Type     | Genome size (bp) | Mono- | Di-  | Tri- | Tetra- | Penta- | Hexa-  | Total |
|--------------|------------------|-------|------|------|--------|--------|--------|-------|
| S1-dsDNA-1   | 168903           | 1.13  | 1.25 | 0.40 | 0.0059 | 0.0059 | 0.0059 | 2.79  |
| S2-dsDNA-2   | 94800            | 1.47  | 1.36 | 0.35 | 0      | 0      | 0      | 3.18  |
| S3-dsDNA-3   | 33593            | 2.17  | 1.82 | 0.45 | 0.0298 | 0      | 0      | 4.47  |
| S4-dsDNA-4   | 36717            | 1.50  | 0.98 | 0.22 | 0      | 0      | 0      | 2.70  |
| S5-dsDNA-5   | 132562           | 1.12  | 1.92 | 0.28 | 0      | 0      | 0      | 3.33  |
| S6-dsDNA-6   | 48502            | 1.71  | 1.48 | 0.39 | 0      | 0      | 0      | 3.59  |
| S7-dsDNA-7   | 48836            | 1.35  | 1.29 | 0.33 | 0.0205 | 0      | 0      | 2.99  |
| S8-dsDNA-8   | 121750           | 0.82  | 1.67 | 0.38 | 0.0082 | 0      | 0      | 2.87  |
| S9-dsDNA-9   | 22172            | 2.89  | 1.67 | 0.68 | 0.0451 | 0      | 0      | 5.28  |
| S10-dsDNA-10 | 52297            | 0.25  | 0.88 | 0.52 | 0.0191 | 0      | 0      | 1.66  |
| S11-dsDNA-11 | 46375            | 1.55  | 1.27 | 0.39 | 0      | 0.0216 | 0      | 3.23  |
| S12-dsDNA-12 | 41491            | 0.27  | 2.46 | 0.48 | 0      | 0      | 0      | 3.21  |
| S13-dsDNA-13 | 39937            | 0.03  | 1.55 | 0.30 | 0      | 0      | 0      | 1.88  |
| S14-dsDNA-14 | 19282            | 0.26  | 1.82 | 0.31 | 0      | 0      | 0      | 2.39  |
| S15-dsDNA-15 | 41724            | 1.10  | 1.27 | 0.50 | 0      | 0      | 0      | 2.88  |
| S16-dsDNA-16 | 70153            | 0.36  | 0.87 | 0.54 | 0.0285 | 0      | 0      | 1.80  |
| S17-dsDNA-17 | 14927            | 1.00  | 0.27 | 0.54 | 0      | 0      | 0      | 1.81  |
| S18-dsDNA-18 | 10079            | 3.57  | 3.08 | 0.79 | 0      | 0      | 0      | 7.44  |
| S19-dsDNA-19 | 11965            | 1.76  | 1.50 | 0.25 | 0      | 0      | 0      | 3.51  |
| S20-dsDNA-20 | 40900            | 3.13  | 2.64 | 0.44 | 0      | 0      | 0      | 6.21  |
| S21-dsDNA-21 | 20869            | 2.11  | 3.07 | 0.34 | 0.0479 | 0      | 0      | 5.56  |
| S22-dsDNA-22 | 35450            | 5.44  | 3.61 | 0.54 | 0      | 0.0564 | 0      | 9.65  |
| S23-dsDNA-23 | 15465            | 1.29  | 2.33 | 0.19 | 0      | 0      | 0      | 3.82  |
| S24-dsDNA-24 | 14462            | 0.35  | 2.01 | 0.00 | 0.0691 | 0      | 0      | 2.42  |
| S25-dsDNA-25 | 194711           | 2.54  | 3.47 | 0.55 | 0.0257 | 0.0051 | 0.0103 | 6.61  |
| S26-dsDNA-26 | 139962           | 0.36  | 6.13 | 1.24 | 0.1429 | 0      | 0.0143 | 7.88  |
| S27-dsDNA-27 | 288539           | 2.51  | 3.42 | 0.59 | 0.0347 | 0.0035 | 0      | 6.56  |
| S28-dsDNA-28 | 149955           | 7.38  | 3.28 | 0.77 | 0.0533 | 0.0067 | 0.0067 | 11.50 |
| S29-dsDNA-29 | 161773           | 1.82  | 2.37 | 0.37 | 0.0247 | 0      | 0      | 4.59  |
| S30-dsDNA-30 | 146454           | 3.66  | 5.13 | 0.82 | 0.0546 | 0.0068 | 0.0205 | 9.70  |
| S31-dsDNA-31 | 190289           | 0.65  | 7.09 | 0.83 | 0.0158 | 0.0105 | 0.0158 | 8.60  |
| S32-dsDNA-32 | 134721           | 6.21  | 2.50 | 0.49 | 0.0148 | 0      | 0      | 9.21  |
| S33-dsDNA-33 | 232392           | 5.95  | 7.98 | 2.38 | 0.0947 | 0.0258 | 0.0129 | 16.45 |
| S34-dsDNA-34 | 170101           | 4.63  | 1.80 | 0.47 | 0.0353 | 0      | 0      | 6.94  |
| S35-dsDNA-35 | 212482           | 4.96  | 1.96 | 0.88 | 0.0329 | 0.0094 | 0.0047 | 7.85  |
| S36-dsDNA-36 | 191100           | 1.50  | 1.15 | 0.64 | 0.0314 | 0.0052 | 0.0052 | 3.33  |
| S37-dsDNA-37 | 105903           | 0.85  | 2.45 | 0.60 | 0      | 0      | 0      | 3.90  |
| S38-dsDNA-38 | 102653           | 3.95  | 2.00 | 0.60 | 0.0097 | 0.0195 | 0.0195 | 6.60  |
| S39-dsDNA-39 | 111362           | 0.57  | 3.62 | 0.70 | 0.0090 | 0      | 0      | 4.90  |

Additional file 4 Continued

|              |        |      |      |      |        |        |        |      |
|--------------|--------|------|------|------|--------|--------|--------|------|
| S40-dsDNA-40 | 330743 | 2.49 | 2.26 | 0.43 | 0.0060 | 0.0121 | 0.0060 | 5.19 |
| S41-dsDNA-41 | 335593 | 1.46 | 2.98 | 0.91 | 0.0328 | 0.0030 | 0.0566 | 5.44 |
| S42-dsDNA-42 | 407339 | 1.89 | 2.45 | 0.95 | 0.0319 | 0      | 0.0074 | 5.33 |
| S43-dsDNA-43 | 133894 | 2.29 | 2.31 | 0.75 | 0.0299 | 0.0149 | 0.0224 | 5.41 |
| S44-dsDNA-44 | 123500 | 1.67 | 3.53 | 1.20 | 0.0729 | 0.0081 | 0.0081 | 6.49 |
| S45-dsDNA-45 | 305107 | 1.71 | 2.10 | 1.82 | 0.0164 | 0      | 0.0262 | 5.67 |
| S46-dsDNA-46 | 134226 | 2.10 | 3.05 | 0.58 | 0.0298 | 0.0224 | 0.0149 | 5.80 |
| S47-dsDNA-47 | 152261 | 4.35 | 3.07 | 1.06 | 0.1248 | 0.0263 | 0.0263 | 8.66 |
| S48-dsDNA-48 | 124884 | 2.27 | 2.52 | 0.31 | 0.0400 | 0.0160 | 0.0080 | 5.16 |
| S49-dsDNA-49 | 177874 | 1.96 | 2.48 | 0.31 | 0.0281 | 0.0112 | 0.1462 | 4.94 |
| S50-dsDNA-50 | 148687 | 1.65 | 2.46 | 0.40 | 0.0202 | 0      | 0      | 4.53 |
| S51-dsDNA-51 | 235646 | 1.46 | 2.91 | 1.26 | 0.0085 | 0      | 0      | 5.63 |
| S52-dsDNA-52 | 230278 | 1.04 | 2.95 | 1.54 | 0.0782 | 0      | 0.0217 | 5.63 |
| S53-dsDNA-53 | 159322 | 3.12 | 2.70 | 0.36 | 0.0063 | 0      | 0.1695 | 6.36 |
| S54-dsDNA-54 | 172764 | 2.43 | 1.93 | 0.76 | 0.0289 | 0      | 0      | 5.16 |
| S55-dsDNA-55 | 112930 | 3.13 | 2.74 | 0.59 | 0.0177 | 0      | 0      | 6.48 |
| S56-dsDNA-56 | 35937  | 1.89 | 2.64 | 1.17 | 0      | 0      | 0.0278 | 5.73 |
| S57-dsDNA-57 | 43804  | 1.07 | 2.47 | 0.82 | 0      | 0      | 0      | 4.36 |
| S58-dsDNA-58 | 29576  | 3.79 | 1.52 | 0.37 | 0      | 0      | 0      | 5.68 |
| S59-dsDNA-59 | 26163  | 2.79 | 1.72 | 0.42 | 0      | 0      | 0      | 4.93 |
| S60-dsDNA-60 | 5243   | 4.01 | 1.14 | 0.76 | 0      | 0      | 0      | 5.91 |
| S61-dsDNA-61 | 7961   | 1.88 | 4.02 | 0.88 | 0      | 0      | 0      | 6.78 |
| S62-dsDNA-62 | 7746   | 2.07 | 2.32 | 0.39 | 0      | 0      | 0      | 4.78 |
| S63-dsDNA-63 | 7353   | 1.22 | 2.04 | 0.82 | 0      | 0      | 0      | 4.08 |
| S64-dsDNA-64 | 8095   | 1.61 | 1.85 | 0.12 | 0      | 0      | 0      | 3.58 |
| S65-dsDNA-65 | 7841   | 2.55 | 1.91 | 0.77 | 0      | 0      | 0      | 5.23 |
| S66-dsDNA-66 | 7610   | 3.55 | 1.84 | 0.66 | 0      | 0      | 0      | 6.04 |
| S67-dsDNA-67 | 7729   | 1.04 | 1.04 | 0.52 | 0      | 0      | 0      | 2.59 |
| S68-dsDNA-68 | 7304   | 0.82 | 2.19 | 0.41 | 0      | 0      | 0      | 3.42 |
| S69-dsDNA-69 | 7687   | 1.30 | 1.95 | 0.52 | 0      | 0      | 0      | 3.77 |
| S70-dsDNA-70 | 7868   | 2.16 | 1.27 | 0.51 | 0      | 0      | 0      | 3.94 |
| S71-dsDNA-71 | 8607   | 3.60 | 2.67 | 0.58 | 0.1162 | 0      | 0      | 6.97 |
| S72-dsDNA-72 | 7815   | 1.41 | 2.30 | 0.51 | 0      | 0      | 0      | 4.22 |
| S73-dsDNA-73 | 7614   | 1.44 | 1.84 | 0.92 | 0      | 0      | 0      | 4.20 |
| S74-dsDNA-74 | 7276   | 1.51 | 1.92 | 0.96 | 0      | 0      | 0      | 4.40 |
| S75-dsDNA-75 | 7879   | 1.40 | 3.17 | 0.76 | 0      | 0      | 0      | 5.33 |
| S76-dsDNA-76 | 246734 | 1.90 | 2.01 | 0.46 | 0.0689 | 0.0122 | 0.0041 | 4.45 |
| S77-dsDNA-77 | 156922 | 0.50 | 2.26 | 0.77 | 0.0382 | 0      | 0      | 3.56 |
| S78-ssDNA-1  | 6407   | 0.94 | 1.09 | 0.78 | 0      | 0      | 0      | 2.81 |
| S79-ssDNA-2  | 4491   | 3.56 | 3.56 | 1.11 | 0      | 0      | 0      | 8.24 |
| S80-ssDNA-3  | 5386   | 0.74 | 0.74 | 0.00 | 0      | 0      | 0      | 1.49 |
| S81-ssDNA-4  | 4421   | 3.39 | 1.81 | 0.23 | 0      | 0      | 0      | 5.43 |
| S82-ssDNA-5  | 4594   | 3.27 | 1.52 | 0.87 | 0      | 0      | 0      | 5.66 |

|                 |       |      |      |      |        |        |        |       |
|-----------------|-------|------|------|------|--------|--------|--------|-------|
| S83-ssDNA-6     | 4877  | 1.23 | 0.82 | 1.03 | 0      | 0      | 0      | 3.08  |
| S84-ssDNA-7     | 2690  | 1.12 | 1.86 | 0.74 | 0      | 0      | 0      | 3.72  |
| S85-ssDNA-8     | 2994  | 1.34 | 2.00 | 1.67 | 0      | 0      | 0      | 5.01  |
| S86-ssDNA-9     | 5232  | 0.76 | 2.10 | 0.38 | 0      | 0      | 0      | 3.25  |
| S87-ssDNA-10    | 2861  | 1.75 | 2.45 | 1.05 | 0      | 0      | 0      | 5.24  |
| S88-ssDNA-11    | 1758  | 2.28 | 1.14 | 1.14 | 0.5688 | 0      | 0      | 5.12  |
| S89-ssDNA-12    | 2319  | 7.33 | 3.02 | 0.43 | 0      | 0      | 0      | 10.78 |
| S90-ssDNA-13    | 3852  | 5.71 | 3.37 | 1.56 | 0      | 0      | 0      | 10.64 |
| S91-ssDNA-14    | 8024  | 0.25 | 3.49 | 1.25 | 0      | 0.1246 | 0      | 5.11  |
| S92-ssDNA-15    | 6396  | 1.09 | 2.97 | 1.41 | 0      | 0      | 0      | 5.47  |
| S93-ssDNA-16    | 5149  | 2.33 | 2.33 | 0.58 | 0      | 0      | 0      | 5.24  |
| S94-ssDNA-17    | 5594  | 2.86 | 2.50 | 0.36 | 0      | 0      | 0      | 5.72  |
| S95-ssDNA-18    | 4679  | 0.43 | 3.42 | 1.07 | 0.8549 | 0      | 0      | 5.77  |
| S96-ssDNA-19    | 4801  | 1.46 | 3.54 | 1.25 | 0      | 0      | 0      | 6.25  |
| S97-ssDNA-20    | 5517  | 2.54 | 5.08 | 0.91 | 0      | 0      | 0      | 8.52  |
| S98-ssDNA-21    | 5908  | 1.18 | 1.86 | 1.35 | 0      | 0      | 0      | 4.40  |
| S99-ssDNA-22    | 5078  | 3.15 | 3.54 | 1.58 | 0.1969 | 0      | 0      | 8.47  |
| S100-ssDNA-23   | 3776  | 2.38 | 2.91 | 1.06 | 0      | 0      | 0      | 6.36  |
| S101-ssDNA-24   | 5454  | 1.10 | 1.65 | 1.28 | 0      | 0      | 0      | 4.03  |
| S102-dsDNA-RT-1 | 3215  | 0.62 | 2.18 | 0.62 | 0      | 0      | 0      | 3.42  |
| S103-dsDNA-RT-2 | 3027  | 0.00 | 1.65 | 1.32 | 0      | 0      | 0      | 2.97  |
| S104-dsDNA-RT-3 | 8024  | 1.00 | 1.87 | 0.87 | 0      | 0      | 0      | 3.74  |
| S105-dsDNA-RT-4 | 8178  | 3.91 | 1.47 | 0.49 | 0      | 0      | 0      | 5.87  |
| S106-dsDNA-RT-5 | 8159  | 4.41 | 3.31 | 1.35 | 0.1226 | 0      | 0      | 9.19  |
| S107-dsDNA-RT-6 | 8002  | 2.00 | 2.62 | 0.50 | 0      | 0      | 0      | 5.12  |
| S108-dsDNA-RT-7 | 7489  | 0.13 | 1.34 | 0.93 | 0      | 0      | 0      | 2.40  |
| S109-dsDNA-RT-8 | 7206  | 1.80 | 1.39 | 0.56 | 0      | 0      | 0      | 3.75  |
| S110-ssRNA-RT-1 | 8805  | 1.36 | 1.82 | 0.34 | 0.1136 | 0      | 0      | 3.63  |
| S111-ssRNA-RT-2 | 8282  | 1.33 | 1.93 | 0.24 | 0      | 0      | 0      | 3.50  |
| S112-ssRNA-RT-3 | 7286  | 0.69 | 3.16 | 0.41 | 0      | 0      | 0      | 4.25  |
| S113-ssRNA-RT-4 | 8419  | 2.61 | 3.09 | 0.24 | 0      | 0      | 0      | 5.94  |
| S114-ssRNA-RT-5 | 9181  | 2.29 | 3.49 | 1.31 | 0      | 0      | 0      | 7.08  |
| S115-ssRNA-RT-6 | 12708 | 1.57 | 1.73 | 0.55 | 0.0787 | 0      | 0      | 3.93  |
| S116-ssRNA-RT-7 | 13246 | 0.91 | 2.26 | 0.75 | 0      | 0      | 0.0755 | 4.00  |
| S117-dsRNA-1    | 13385 | 0.30 | 2.17 | 0.37 | 0      | 0      | 0      | 2.84  |
| S118-dsRNA-2    | 23564 | 0.25 | 1.99 | 0.34 | 0      | 0      | 0      | 2.59  |
| S119-dsRNA-3    | 19208 | 1.09 | 2.34 | 0.57 | 0      | 0      | 0      | 4.01  |
| S120-dsRNA-4    | 17448 | 1.55 | 2.24 | 0.46 | 0      | 0      | 0      | 4.24  |
| S121-dsRNA-5    | 29174 | 0.55 | 2.16 | 0.55 | 0.0343 | 0      | 0      | 3.29  |
| S122-dsRNA-6    | 23015 | 0.65 | 1.87 | 0.39 | 0      | 0      | 0      | 2.91  |
| S123-dsRNA-7    | 24732 | 0.04 | 2.59 | 0.28 | 0      | 0      | 0      | 2.91  |
| S124-dsRNA-8    | 29339 | 1.87 | 1.77 | 0.61 | 0      | 0      | 0      | 4.26  |
| S125-dsRNA-9    | 25709 | 0.62 | 1.83 | 0.51 | 0      | 0      | 0      | 2.96  |

Additional file 4 Continued

|                 |       |      |      |      |        |        |   |      |
|-----------------|-------|------|------|------|--------|--------|---|------|
| S126-dsRNA-10   | 26164 | 0.15 | 2.33 | 0.34 | 0      | 0      | 0 | 2.83 |
| S127-dsRNA-11   | 20682 | 0.24 | 1.45 | 0.48 | 0      | 0      | 0 | 2.18 |
| S128-dsRNA-12   | 23433 | 0.17 | 1.96 | 0.34 | 0.0427 | 0      | 0 | 2.52 |
| S129-dsRNA-13   | 5881  | 0.85 | 2.21 | 0.51 | 0      | 0      | 0 | 3.57 |
| S130-dsRNA-14   | 5898  | 0.17 | 1.70 | 0.34 | 0      | 0      | 0 | 2.20 |
| S131-dsRNA-15   | 6603  | 1.06 | 1.51 | 0.15 | 0      | 0      | 0 | 2.73 |
| S132-dsRNA-16   | 4579  | 0.22 | 1.97 | 0.22 | 0      | 0      | 0 | 2.40 |
| S133-dsRNA-17   | 6277  | 1.12 | 1.91 | 0.32 | 0      | 0      | 0 | 3.35 |
| S134-dsRNA-18   | 5284  | 1.14 | 2.65 | 0.57 | 0      | 0      | 0 | 4.35 |
| S135-dsRNA-19   | 6105  | 1.64 | 1.97 | 0.49 | 0      | 0      | 0 | 4.10 |
| S136-dsRNA-20   | 3663  | 0.55 | 2.18 | 0.27 | 0      | 0      | 0 | 3.00 |
| S137-dsRNA-21   | 12640 | 1.34 | 1.82 | 1.19 | 0      | 0      | 0 | 4.35 |
| S138-dsRNA-22   | 12734 | 0.16 | 1.41 | 0.39 | 0      | 0      | 0 | 1.96 |
| S139-dsRNA-23   | 17635 | 1.30 | 2.32 | 0.51 | 0      | 0      | 0 | 4.14 |
| S140(-)ssRNA-1  | 8910  | 1.12 | 1.91 | 0.22 | 0      | 0      | 0 | 3.25 |
| S141(-)ssRNA-2  | 11161 | 1.70 | 2.24 | 0.27 | 0      | 0      | 0 | 4.21 |
| S142(-)ssRNA-3  | 11932 | 1.76 | 2.85 | 0.17 | 0      | 0      | 0 | 4.78 |
| S143(-)ssRNA-4  | 14900 | 2.75 | 2.48 | 0.54 | 0.0671 | 0      | 0 | 5.84 |
| S144(-)ssRNA-5  | 12807 | 0.70 | 2.97 | 0.62 | 0      | 0      | 0 | 4.29 |
| S145(-)ssRNA-6  | 12020 | 0.50 | 2.33 | 0.75 | 0      | 0      | 0 | 3.58 |
| S146(-)ssRNA-7  | 11131 | 1.80 | 1.98 | 0.99 | 0      | 0      | 0 | 4.76 |
| S147(-)ssRNA-8  | 19111 | 1.20 | 1.94 | 0.16 | 0      | 0      | 0 | 3.30 |
| S148(-)ssRNA-9  | 18959 | 1.37 | 2.00 | 0.32 | 0.1055 | 0      | 0 | 3.80 |
| S149(-)ssRNA-10 | 15384 | 0.33 | 2.47 | 0.26 | 0      | 0      | 0 | 3.06 |
| S150(-)ssRNA-11 | 15894 | 1.51 | 1.70 | 0.25 | 0      | 0      | 0 | 3.46 |
| S151(-)ssRNA-12 | 15384 | 1.30 | 2.54 | 0.07 | 0      | 0      | 0 | 3.90 |
| S152(-)ssRNA-13 | 18234 | 0.82 | 2.41 | 0.49 | 0      | 0      | 0 | 3.73 |
| S153(-)ssRNA-14 | 15186 | 1.45 | 2.44 | 0.26 | 0      | 0      | 0 | 4.15 |
| S154(-)ssRNA-15 | 15225 | 2.43 | 2.50 | 0.33 | 0      | 0      | 0 | 5.25 |
| S155(-)ssRNA-16 | 14071 | 1.92 | 3.13 | 0.71 | 0      | 0      | 0 | 5.76 |
| S156(-)ssRNA-17 | 12878 | 1.32 | 3.80 | 0.62 | 0      | 0      | 0 | 5.75 |
| S157(-)ssRNA-18 | 11278 | 2.75 | 2.84 | 0.80 | 0      | 0      | 0 | 6.38 |
| S158(-)ssRNA-19 | 13460 | 0.59 | 2.90 | 0.45 | 0      | 0      | 0 | 3.94 |
| S159(-)ssRNA-20 | 12555 | 1.59 | 2.39 | 0.48 | 0      | 0      | 0 | 4.46 |
| S160(-)ssRNA-21 | 10461 | 0.86 | 3.54 | 0.38 | 0      | 0      | 0 | 4.78 |
| S161(-)ssRNA-22 | 14452 | 1.04 | 1.52 | 0.62 | 0.0692 | 0      | 0 | 3.25 |
| S162(-)ssRNA-23 | 12716 | 0.55 | 2.67 | 0.79 | 0.0786 | 0      | 0 | 4.09 |
| S163(-)ssRNA-24 | 12294 | 1.38 | 3.01 | 0.89 | 0.0813 | 0      | 0 | 5.37 |
| S164(-)ssRNA-25 | 11845 | 1.60 | 2.87 | 1.27 | 0.0844 | 0      | 0 | 5.83 |
| S165(-)ssRNA-26 | 18859 | 2.12 | 2.01 | 0.48 | 0      | 0      | 0 | 4.61 |
| S166(-)ssRNA-27 | 11979 | 0.67 | 3.01 | 1.09 | 0      | 0      | 0 | 4.76 |
| S167(-)ssRNA-28 | 16634 | 3.55 | 2.22 | 0.48 | 0      | 0.1202 | 0 | 6.37 |
| S168(-)ssRNA-29 | 17145 | 1.63 | 3.62 | 0.35 | 0      | 0      | 0 | 5.60 |

## Additional file 4 Continued

|                  |       |      |      |      |        |        |        |      |
|------------------|-------|------|------|------|--------|--------|--------|------|
| S169-(-)ssRNA-30 | 10056 | 0.99 | 1.79 | 0.10 | 0      | 0      | 0      | 2.88 |
| S170-(-)ssRNA-31 | 1682  | 3.57 | 2.97 | 0.59 | 0      | 0      | 0      | 7.13 |
| S171-(+)ssRNA-1  | 3569  | 0.56 | 1.68 | 0.00 | 0      | 0      | 0      | 2.24 |
| S172-(+)ssRNA-2  | 4215  | 0.47 | 0.95 | 0.47 | 0      | 0      | 0      | 1.90 |
| S173-(+)ssRNA-3  | 2514  | 1.19 | 1.19 | 0.40 | 0      | 0      | 0      | 2.78 |
| S174-(+)ssRNA-4  | 2728  | 0.00 | 2.57 | 0.00 | 0      | 0      | 0      | 2.57 |
| S175-(+)ssRNA-5  | 7440  | 0.40 | 2.02 | 0.40 | 0      | 0      | 0      | 2.82 |
| S176-(+)ssRNA-6  | 7152  | 0.28 | 3.22 | 0.14 | 0      | 0      | 0      | 3.64 |
| S177-(+)ssRNA-7  | 7478  | 1.20 | 1.20 | 0.53 | 0      | 0      | 0      | 2.94 |
| S178-(+)ssRNA-8  | 7835  | 1.02 | 2.30 | 0.51 | 0      | 0      | 0      | 3.83 |
| S179-(+)ssRNA-9  | 8161  | 0.25 | 2.82 | 0.37 | 0      | 0      | 0      | 3.43 |
| S180-(+)ssRNA-10 | 7348  | 0.82 | 1.63 | 0.00 | 0      | 0      | 0      | 2.45 |
| S181-(+)ssRNA-11 | 8828  | 0.34 | 1.81 | 0.11 | 0      | 0      | 0      | 2.27 |
| S182-(+)ssRNA-12 | 8251  | 1.94 | 2.79 | 0.24 | 0.3636 | 0      | 0      | 5.33 |
| S183-(+)ssRNA-13 | 7117  | 0.28 | 2.25 | 0.28 | 0      | 0      | 0      | 2.81 |
| S184-(+)ssRNA-14 | 9650  | 1.14 | 2.59 | 0.31 | 0      | 0      | 0      | 4.04 |
| S185-(+)ssRNA-15 | 9185  | 0.44 | 2.83 | 0.65 | 0      | 0      | 0      | 3.92 |
| S186-(+)ssRNA-16 | 8587  | 0.70 | 1.86 | 0.47 | 0      | 0      | 0      | 3.03 |
| S187-(+)ssRNA-17 | 9871  | 0.41 | 2.84 | 0.30 | 0      | 0      | 0      | 3.55 |
| S188-(+)ssRNA-18 | 12226 | 0.25 | 2.62 | 0.08 | 0      | 0      | 0      | 2.94 |
| S189-(+)ssRNA-19 | 12138 | 0.91 | 3.21 | 0.58 | 0      | 0      | 0      | 4.70 |
| S190-(+)ssRNA-20 | 10349 | 1.16 | 2.80 | 0.48 | 0      | 0      | 0      | 4.44 |
| S191-(+)ssRNA-21 | 9370  | 0.21 | 1.92 | 0.32 | 0      | 0      | 0      | 2.45 |
| S192-(+)ssRNA-22 | 9263  | 0.97 | 2.48 | 0.11 | 0      | 0      | 0      | 3.56 |
| S193-(+)ssRNA-23 | 11443 | 0.70 | 2.62 | 0.26 | 0.1748 | 0      | 0      | 3.76 |
| S194-(+)ssRNA-24 | 9704  | 0.10 | 3.30 | 0.21 | 0      | 0      | 0.1031 | 3.71 |
| S195-(+)ssRNA-25 | 9535  | 0.10 | 2.20 | 0.31 | 0      | 0      | 0      | 2.62 |
| S196-(+)ssRNA-26 | 11219 | 0.36 | 3.03 | 0.71 | 0      | 0.1783 | 0      | 4.28 |
| S197-(+)ssRNA-27 | 10818 | 0.55 | 1.48 | 0.46 | 0      | 0      | 0      | 2.50 |
| S198-(+)ssRNA-28 | 9384  | 0.11 | 1.71 | 0.21 | 0      | 0      | 0      | 2.02 |
| S199-(+)ssRNA-29 | 8284  | 0.60 | 1.45 | 0.12 | 0      | 0      | 0      | 2.17 |
| S200-(+)ssRNA-30 | 7437  | 0.13 | 2.02 | 0.13 | 0      | 0      | 0      | 2.29 |
| S201-(+)ssRNA-31 | 7654  | 1.05 | 1.96 | 0.65 | 0      | 0      | 0      | 3.66 |
| S202-(+)ssRNA-32 | 7476  | 0.40 | 2.27 | 0.27 | 0.1338 | 0      | 0      | 3.08 |
| S203-(+)ssRNA-33 | 7176  | 0.70 | 1.53 | 0.84 | 0      | 0      | 0      | 3.07 |
| S204-(+)ssRNA-34 | 6813  | 1.32 | 1.91 | 0.44 | 0      | 0      | 0      | 3.67 |
| S205-(+)ssRNA-35 | 7003  | 1.57 | 2.71 | 0.57 | 0      | 0      | 0      | 4.86 |
| S206-(+)ssRNA-36 | 4540  | 0.00 | 0.66 | 0.22 | 0      | 0      | 0      | 0.88 |
| S207-(+)ssRNA-37 | 4528  | 0.22 | 1.10 | 0.44 | 0      | 0      | 0      | 1.77 |
| S208-(+)ssRNA-38 | 6625  | 0.75 | 1.51 | 0.75 | 0      | 0      | 0      | 3.02 |
| S209-(+)ssRNA-39 | 4194  | 0.48 | 2.62 | 0.48 | 0      | 0      | 0      | 3.58 |
| S210-(+)ssRNA-40 | 5677  | 0.88 | 2.29 | 0.53 | 0.1761 | 0      | 0      | 3.88 |
| S211-(+)ssRNA-41 | 5987  | 0.17 | 1.67 | 0.50 | 0      | 0      | 0      | 2.34 |

## Additional file 4 Continued

|                  |       |      |      |      |        |   |        |      |
|------------------|-------|------|------|------|--------|---|--------|------|
| S212-(+)ssRNA-42 | 5706  | 0.88 | 0.88 | 0.35 | 0      | 0 | 0      | 2.10 |
| S213-(+)ssRNA-43 | 4776  | 0.42 | 3.14 | 0.21 | 0      | 0 | 0      | 3.77 |
| S214-(+)ssRNA-44 | 4003  | 1.00 | 3.00 | 0.00 | 0      | 0 | 0      | 4.00 |
| S215-(+)ssRNA-45 | 3684  | 1.09 | 1.36 | 1.09 | 0      | 0 | 0      | 3.53 |
| S216-(+)ssRNA-46 | 5243  | 0.19 | 1.72 | 0.00 | 0      | 0 | 0      | 1.91 |
| S217-(+)ssRNA-47 | 4437  | 0.45 | 2.93 | 0.23 | 0      | 0 | 0      | 3.61 |
| S218-(+)ssRNA-48 | 4114  | 0.24 | 2.43 | 0.00 | 0      | 0 | 0      | 2.67 |
| S219-(+)ssRNA-49 | 4354  | 0.92 | 2.30 | 0.69 | 0      | 0 | 0      | 3.90 |
| S220-(+)ssRNA-50 | 4326  | 0.92 | 2.08 | 0.69 | 0      | 0 | 0      | 3.70 |
| S221-(+)ssRNA-51 | 12704 | 0.08 | 2.20 | 0.87 | 0      | 0 | 0      | 3.15 |
| S222-(+)ssRNA-52 | 27608 | 0.36 | 2.39 | 0.51 | 0      | 0 | 0      | 3.26 |
| S223-(+)ssRNA-53 | 28475 | 1.37 | 1.72 | 0.49 | 0      | 0 | 0      | 3.58 |
| S224-(+)ssRNA-54 | 26253 | 0.15 | 3.54 | 0.53 | 0      | 0 | 0      | 4.23 |
| S225-(+)ssRNA-55 | 10862 | 0.92 | 2.67 | 0.46 | 0      | 0 | 0      | 4.05 |
| S226-(+)ssRNA-56 | 12573 | 1.51 | 2.47 | 0.80 | 0      | 0 | 0      | 4.77 |
| S227-(+)ssRNA-57 | 9646  | 2.07 | 1.66 | 0.41 | 0      | 0 | 0      | 4.15 |
| S228-(+)ssRNA-58 | 11703 | 0.68 | 1.45 | 0.43 | 0.0854 | 0 | 0      | 2.65 |
| S229-(+)ssRNA-59 | 9755  | 1.54 | 4.82 | 0.92 | 0      | 0 | 0      | 7.28 |
| S230-(+)ssRNA-60 | 6395  | 1.25 | 3.28 | 0.47 | 0      | 0 | 0      | 5.00 |
| S231-(+)ssRNA-61 | 10646 | 0.85 | 2.35 | 0.66 | 0      | 0 | 0      | 3.85 |
| S232-(+)ssRNA-62 | 10221 | 0.59 | 1.47 | 0.68 | 0      | 0 | 0      | 2.74 |
| S233-(+)ssRNA-63 | 10692 | 0.94 | 2.15 | 0.94 | 0      | 0 | 0      | 4.02 |
| S234-(+)ssRNA-64 | 12141 | 1.81 | 1.89 | 0.74 | 0      | 0 | 0      | 4.45 |
| S235-(+)ssRNA-65 | 10401 | 1.06 | 3.17 | 1.06 | 0      | 0 | 0      | 5.29 |
| S236-(+)ssRNA-66 | 15914 | 0.25 | 2.07 | 1.07 | 0      | 0 | 0.0628 | 3.46 |
| S237-(+)ssRNA-67 | 8274  | 0.73 | 1.93 | 0.24 | 0      | 0 | 0      | 2.90 |
| S238-(+)ssRNA-68 | 8622  | 0.46 | 2.78 | 0.23 | 0      | 0 | 0      | 3.48 |
| S239-(+)ssRNA-69 | 8210  | 0.37 | 2.92 | 0.73 | 0      | 0 | 0      | 4.02 |
| S240-(+)ssRNA-70 | 8623  | 0.46 | 2.55 | 0.58 | 0      | 0 | 0      | 3.60 |
| S241-(+)ssRNA-71 | 8301  | 1.20 | 1.57 | 0.36 | 0      | 0 | 0      | 3.13 |
| S242-(+)ssRNA-72 | 4852  | 0.62 | 1.03 | 0.62 | 0      | 0 | 0      | 2.27 |
| S243-(+)ssRNA-73 | 7680  | 0.39 | 2.73 | 0.26 | 0      | 0 | 0      | 3.39 |
| S244-(+)ssRNA-74 | 7564  | 4.36 | 1.32 | 1.45 | 0      | 0 | 0      | 7.14 |
| S245-(+)ssRNA-75 | 6318  | 1.27 | 1.58 | 0.16 | 0      | 0 | 0      | 3.01 |
| S246-(+)ssRNA-76 | 6305  | 0.63 | 1.90 | 0.48 | 0      | 0 | 0      | 3.01 |
| S247-(+)ssRNA-77 | 15480 | 0.78 | 2.07 | 0.39 | 0      | 0 | 0      | 3.23 |
| S248-(+)ssRNA-78 | 15311 | 0.72 | 2.35 | 0.46 | 0.0653 | 0 | 0      | 3.59 |
| S249-(+)ssRNA-79 | 17919 | 0.89 | 1.90 | 0.45 | 0      | 0 | 0      | 3.24 |
| S250-(+)ssRNA-80 | 6435  | 0.16 | 2.02 | 0.62 | 0      | 0 | 0      | 2.80 |
| S251-(+)ssRNA-81 | 7560  | 0.13 | 3.84 | 0.79 | 0.1323 | 0 | 0      | 4.89 |
| S252-(+)ssRNA-82 | 8832  | 0.23 | 2.26 | 0.00 | 0      | 0 | 0      | 2.49 |
| S253-(+)ssRNA-83 | 9306  | 0.54 | 2.15 | 0.43 | 0      | 0 | 0      | 3.12 |
| S254-(+)ssRNA-84 | 6495  | 1.69 | 1.54 | 0.15 | 0.1540 | 0 | 0      | 3.54 |

Additional file 4 Continued

|                  |      |      |      |      |   |   |   |      |
|------------------|------|------|------|------|---|---|---|------|
| S255-(+)ssRNA-85 | 7351 | 0.14 | 1.90 | 0.27 | 0 | 0 | 0 | 2.31 |
| S256-(+)ssRNA-86 | 7555 | 1.19 | 2.51 | 0.40 | 0 | 0 | 0 | 4.10 |
| S257-(+)ssRNA-87 | 4009 | 0.50 | 1.00 | 0.75 | 0 | 0 | 0 | 2.24 |
