# Supplementary material for: Coevolution between simple sequence repeats (SSRs) and virus genome size
Source: PubMed Central journal article supplement (PMC3585866; doi:10.1186/1471-2164-13-435), 2012-08-30
Supplement: 1471-2164-13-435-S5.pdf [file 1471-2164-13-435-S5.pdf]

## Additional file 5 Relative density of SSRs in analyzed virus genomes

| No. Type     | Genome size (bp) | Mono- | Di-   | Tri-  | Tetra- | Penta- | Hexa- | Total  |
|--------------|------------------|-------|-------|-------|--------|--------|-------|--------|
| S1-dsDNA-1   | 168903           | 6.83  | 7.52  | 3.57  | 0.071  | 0.089  | 0.107 | 18.19  |
| S2-dsDNA-2   | 94800            | 9.19  | 8.40  | 3.16  | 0      | 0      | 0     | 20.75  |
| S3-dsDNA-3   | 33593            | 13.66 | 11.01 | 4.02  | 0.357  | 0      | 0     | 29.05  |
| S4-dsDNA-4   | 36717            | 9.21  | 6.05  | 1.96  | 0      | 0      | 0     | 17.21  |
| S5-dsDNA-5   | 132562           | 7.37  | 11.83 | 2.51  | 0      | 0      | 0     | 21.71  |
| S6-dsDNA-6   | 48502            | 10.66 | 9.07  | 3.59  | 0      | 0      | 0     | 23.32  |
| S7-dsDNA-7   | 48836            | 8.52  | 7.99  | 2.95  | 0.246  | 0      | 0     | 19.70  |
| S8-dsDNA-8   | 121750           | 4.94  | 10.09 | 3.43  | 0.099  | 0      | 0     | 18.55  |
| S9-dsDNA-9   | 22172            | 18.54 | 10.10 | 6.36  | 0.541  | 0      | 0     | 35.54  |
| S10-dsDNA-10 | 52297            | 1.53  | 5.43  | 4.76  | 0.229  | 0      | 0     | 11.95  |
| S11-dsDNA-11 | 46375            | 9.83  | 7.68  | 3.56  | 0      | 0.323  | 0     | 21.39  |
| S12-dsDNA-12 | 41491            | 1.61  | 14.94 | 4.48  | 0      | 0      | 0     | 21.04  |
| S13-dsDNA-13 | 39937            | 0.15  | 9.41  | 2.70  | 0      | 0      | 0     | 12.27  |
| S14-dsDNA-14 | 19282            | 1.56  | 10.89 | 2.80  | 0      | 0      | 0     | 15.25  |
| S15-dsDNA-15 | 41724            | 6.97  | 7.96  | 4.53  | 0      | 0      | 0     | 19.46  |
| S16-dsDNA-16 | 70153            | 2.25  | 5.22  | 4.88  | 0.342  | 0      | 0     | 12.69  |
| S17-dsDNA-17 | 14927            | 6.30  | 1.61  | 5.23  | 0      | 0      | 0     | 13.13  |
| S18-dsDNA-18 | 10079            | 22.82 | 18.65 | 7.14  | 0      | 0      | 0     | 48.62  |
| S19-dsDNA-19 | 11965            | 11.37 | 9.69  | 2.26  | 0      | 0      | 0     | 23.32  |
| S20-dsDNA-20 | 40900            | 20.10 | 16.43 | 4.03  | 0      | 0      | 0     | 40.56  |
| S21-dsDNA-21 | 20869            | 13.32 | 18.98 | 3.02  | 0.575  | 0      | 0     | 35.89  |
| S22-dsDNA-22 | 35450            | 35.57 | 22.34 | 4.91  | 0      | 0.846  | 0     | 63.67  |
| S23-dsDNA-23 | 15465            | 7.95  | 14.87 | 1.75  | 0      | 0      | 0     | 24.57  |
| S24-dsDNA-24 | 14462            | 2.07  | 12.45 | 0.00  | 0.830  | 0      | 0     | 15.35  |
| S25-dsDNA-25 | 194711           | 16.32 | 21.28 | 5.08  | 0.308  | 0.077  | 0.185 | 43.26  |
| S26-dsDNA-26 | 139962           | 2.24  | 39.70 | 11.23 | 1.772  | 0      | 0.257 | 55.19  |
| S27-dsDNA-27 | 288539           | 16.08 | 21.30 | 5.32  | 0.416  | 0.052  | 0     | 43.18  |
| S28-dsDNA-28 | 149955           | 50.03 | 20.57 | 7.10  | 0.640  | 0.100  | 0.120 | 78.56  |
| S29-dsDNA-29 | 161773           | 11.79 | 14.64 | 3.49  | 0.297  | 0      | 0     | 30.21  |
| S30-dsDNA-30 | 146454           | 24.03 | 32.61 | 7.58  | 0.655  | 0.171  | 0.533 | 65.58  |
| S31-dsDNA-31 | 190289           | 4.56  | 49.78 | 7.65  | 0.189  | 0.158  | 0.284 | 62.62  |
| S32-dsDNA-32 | 134721           | 41.46 | 15.56 | 4.56  | 0.178  | 0      | 0     | 61.76  |
| S33-dsDNA-33 | 232392           | 39.99 | 51.32 | 22.38 | 1.136  | 0.387  | 0.232 | 115.45 |
| S34-dsDNA-34 | 170101           | 31.46 | 11.10 | 4.30  | 0.423  | 0      | 0     | 47.28  |
| S35-dsDNA-35 | 212482           | 32.07 | 12.18 | 8.03  | 0.395  | 0.141  | 0.113 | 52.93  |
| S36-dsDNA-36 | 191100           | 9.51  | 7.02  | 5.84  | 0.377  | 0.078  | 0.094 | 22.93  |
| S37-dsDNA-37 | 105903           | 5.52  | 15.81 | 5.47  | 0      | 0      | 0     | 26.80  |
| S38-dsDNA-38 | 102653           | 25.23 | 12.31 | 5.52  | 0.117  | 0.292  | 0.409 | 43.89  |
| S39-dsDNA-39 | 111362           | 3.62  | 22.52 | 6.82  | 0.108  | 0      | 0     | 33.06  |

## Additional file 5 Continued

|              |        |       |       |       |       |       |       |       |
|--------------|--------|-------|-------|-------|-------|-------|-------|-------|
| S40-dsDNA-40 | 330743 | 16.28 | 13.90 | 3.92  | 0.169 | 0.181 | 0.109 | 34.56 |
| S41-dsDNA-41 | 335593 | 9.73  | 18.70 | 9.26  | 0.393 | 0.045 | 1.287 | 39.41 |
| S42-dsDNA-42 | 407339 | 11.91 | 15.25 | 8.94  | 0.383 | 0     | 0.133 | 36.61 |
| S43-dsDNA-43 | 133894 | 14.43 | 14.21 | 7.33  | 0.358 | 0.224 | 0.403 | 36.95 |
| S44-dsDNA-44 | 123500 | 10.82 | 21.91 | 11.44 | 0.939 | 0.121 | 0.194 | 45.43 |
| S45-dsDNA-45 | 305107 | 10.81 | 12.90 | 19.31 | 0.210 | 0     | 0.472 | 43.71 |
| S46-dsDNA-46 | 134226 | 14.09 | 20.61 | 5.65  | 0.358 | 0.335 | 0.402 | 41.45 |
| S47-dsDNA-47 | 152261 | 28.83 | 19.51 | 10.17 | 1.497 | 0.558 | 0.867 | 61.42 |
| S48-dsDNA-48 | 124884 | 15.23 | 15.90 | 2.83  | 0.480 | 0.240 | 0.144 | 34.83 |
| S49-dsDNA-49 | 177874 | 13.93 | 15.20 | 2.83  | 0.337 | 0.197 | 5.566 | 38.06 |
| S50-dsDNA-50 | 148687 | 10.59 | 15.02 | 3.65  | 0.242 | 0     | 0     | 29.51 |
| S51-dsDNA-51 | 235646 | 9.93  | 18.08 | 11.73 | 0.119 | 0     | 0     | 39.85 |
| S52-dsDNA-52 | 230278 | 6.78  | 18.48 | 14.73 | 1.060 | 0     | 0.417 | 41.47 |
| S53-dsDNA-53 | 159322 | 21.11 | 16.91 | 3.54  | 0.075 | 0     | 7.268 | 48.91 |
| S54-dsDNA-54 | 172764 | 15.30 | 11.99 | 7.00  | 0.370 | 0     | 0     | 34.66 |
| S55-dsDNA-55 | 112930 | 20.07 | 16.86 | 5.58  | 0.248 | 0     | 0     | 42.76 |
| S56-dsDNA-56 | 35937  | 12.30 | 16.58 | 11.69 | 0     | 0     | 0.501 | 41.07 |
| S57-dsDNA-57 | 43804  | 6.89  | 15.25 | 7.94  | 0     | 0     | 0     | 30.09 |
| S58-dsDNA-58 | 29576  | 24.18 | 9.33  | 3.35  | 0     | 0     | 0     | 36.85 |
| S59-dsDNA-59 | 26163  | 17.89 | 10.32 | 4.13  | 0     | 0     | 0     | 32.34 |
| S60-dsDNA-60 | 5243   | 25.37 | 6.87  | 8.58  | 0     | 0     | 0     | 40.82 |
| S61-dsDNA-61 | 7961   | 12.69 | 25.62 | 8.29  | 0     | 0     | 0     | 46.60 |
| S62-dsDNA-62 | 7746   | 13.43 | 15.23 | 4.65  | 0     | 0     | 0     | 33.31 |
| S63-dsDNA-63 | 7353   | 7.75  | 12.51 | 7.75  | 0     | 0     | 0     | 28.02 |
| S64-dsDNA-64 | 8095   | 10.99 | 11.37 | 1.11  | 0     | 0     | 0     | 23.47 |
| S65-dsDNA-65 | 7841   | 17.09 | 11.48 | 8.03  | 0     | 0     | 0     | 36.60 |
| S66-dsDNA-66 | 7610   | 23.00 | 11.30 | 6.31  | 0     | 0     | 0     | 40.60 |
| S67-dsDNA-67 | 7729   | 7.12  | 6.73  | 4.66  | 0     | 0     | 0     | 18.50 |
| S68-dsDNA-68 | 7304   | 4.93  | 13.96 | 3.70  | 0     | 0     | 0     | 22.59 |
| S69-dsDNA-69 | 7687   | 8.85  | 11.71 | 5.07  | 0     | 0     | 0     | 25.63 |
| S70-dsDNA-70 | 7868   | 14.23 | 7.63  | 4.96  | 0     | 0     | 0     | 26.82 |
| S71-dsDNA-71 | 8607   | 27.88 | 16.50 | 6.97  | 1.394 | 0     | 0     | 52.75 |
| S72-dsDNA-72 | 7815   | 9.34  | 14.08 | 4.61  | 0     | 0     | 0     | 28.02 |
| S73-dsDNA-73 | 7614   | 9.06  | 11.03 | 8.67  | 0     | 0     | 0     | 28.76 |
| S74-dsDNA-74 | 7276   | 9.76  | 11.82 | 9.48  | 0     | 0     | 0     | 31.06 |
| S75-dsDNA-75 | 7879   | 9.90  | 19.80 | 6.85  | 0     | 0     | 0     | 36.55 |
| S76-dsDNA-76 | 246734 | 12.84 | 12.47 | 4.26  | 0.875 | 0.203 | 0.073 | 30.71 |
| S77-dsDNA-77 | 156922 | 3.53  | 14.26 | 8.39  | 0.459 | 0     | 0     | 26.64 |
| S78-ssDNA-1  | 6407   | 6.09  | 6.56  | 7.02  | 0     | 0     | 0     | 19.67 |
| S79-ssDNA-2  | 4491   | 24.27 | 22.71 | 10.02 | 0     | 0     | 0     | 57.00 |
| S80-ssDNA-3  | 5386   | 4.64  | 4.46  | 0.00  | 0     | 0     | 0     | 9.10  |
| S81-ssDNA-4  | 4421   | 22.62 | 11.31 | 2.04  | 0     | 0     | 0     | 35.96 |
| S82-ssDNA-5  | 4594   | 21.11 | 9.14  | 8.49  | 0     | 0     | 0     | 38.75 |

## Additional file 5 Continued

|                 |       |       |       |       |        |       |       |       |
|-----------------|-------|-------|-------|-------|--------|-------|-------|-------|
| S83-ssDNA-6     | 4877  | 9.02  | 5.33  | 9.23  | 0      | 0     | 0     | 23.58 |
| S84-ssDNA-7     | 2690  | 7.06  | 11.15 | 6.69  | 0      | 0     | 0     | 24.91 |
| S85-ssDNA-8     | 2994  | 8.35  | 12.02 | 15.03 | 0      | 0     | 0     | 35.40 |
| S86-ssDNA-9     | 5232  | 4.59  | 14.14 | 3.44  | 0      | 0     | 0     | 22.17 |
| S87-ssDNA-10    | 2861  | 10.49 | 14.68 | 9.44  | 0      | 0     | 0     | 34.60 |
| S88-ssDNA-11    | 1758  | 14.22 | 6.83  | 10.24 | 6.826  | 0     | 0     | 38.11 |
| S89-ssDNA-12    | 2319  | 49.59 | 18.11 | 3.88  | 0      | 0     | 0     | 71.58 |
| S90-ssDNA-13    | 3852  | 39.20 | 20.77 | 14.02 | 0      | 0     | 0     | 73.99 |
| S91-ssDNA-14    | 8024  | 1.74  | 23.68 | 11.59 | 0      | 1.869 | 0     | 38.88 |
| S92-ssDNA-15    | 6396  | 7.04  | 19.39 | 12.66 | 0      | 0     | 0     | 39.09 |
| S93-ssDNA-16    | 5149  | 14.76 | 14.76 | 5.24  | 0      | 0     | 0     | 34.76 |
| S94-ssDNA-17    | 5594  | 17.70 | 15.73 | 3.22  | 0      | 0     | 0     | 36.65 |
| S95-ssDNA-18    | 4679  | 2.56  | 20.94 | 10.26 | 10.259 | 0     | 0     | 44.03 |
| S96-ssDNA-19    | 4801  | 9.37  | 22.91 | 13.12 | 0      | 0     | 0     | 45.41 |
| S97-ssDNA-20    | 5517  | 16.13 | 31.54 | 8.16  | 0      | 0     | 0     | 55.83 |
| S98-ssDNA-21    | 5908  | 7.62  | 11.17 | 13.20 | 0      | 0     | 0     | 31.99 |
| S99-ssDNA-22    | 5078  | 19.69 | 21.27 | 14.18 | 2.363  | 0     | 0     | 57.50 |
| S100-ssDNA-23   | 3776  | 15.36 | 19.07 | 9.53  | 0      | 0     | 0     | 43.96 |
| S101-ssDNA-24   | 5454  | 7.15  | 10.27 | 13.75 | 0      | 0     | 0     | 31.17 |
| S102-dsDNA-RT-1 | 3215  | 3.73  | 13.06 | 5.60  | 0      | 0     | 0     | 22.40 |
| S103-dsDNA-RT-2 | 3027  | 0.00  | 10.57 | 11.89 | 0      | 0     | 0     | 22.46 |
| S104-dsDNA-RT-3 | 8024  | 6.11  | 11.96 | 7.85  | 0      | 0     | 0     | 25.92 |
| S105-dsDNA-RT-4 | 8178  | 23.60 | 8.80  | 4.40  | 0      | 0     | 0     | 36.81 |
| S106-dsDNA-RT-5 | 8159  | 26.84 | 21.33 | 12.50 | 1.471  | 0     | 0     | 62.14 |
| S107-dsDNA-RT-6 | 8002  | 12.00 | 17.25 | 4.50  | 0      | 0     | 0     | 33.74 |
| S108-dsDNA-RT-7 | 7489  | 0.80  | 8.01  | 8.41  | 0      | 0     | 0     | 17.23 |
| S109-dsDNA-RT-8 | 7206  | 10.82 | 8.60  | 5.00  | 0      | 0     | 0     | 24.42 |
| S110-ssRNA-RT-1 | 8805  | 8.18  | 11.36 | 3.41  | 1.363  | 0     | 0     | 24.30 |
| S111-ssRNA-RT-2 | 8282  | 8.33  | 12.07 | 2.17  | 0      | 0     | 0     | 22.58 |
| S112-ssRNA-RT-3 | 7286  | 4.12  | 19.49 | 4.12  | 0      | 0     | 0     | 27.72 |
| S113-ssRNA-RT-4 | 8419  | 17.34 | 19.48 | 2.14  | 0      | 0     | 0     | 38.96 |
| S114-ssRNA-RT-5 | 9181  | 13.83 | 22.00 | 12.09 | 0      | 0     | 0     | 47.93 |
| S115-ssRNA-RT-6 | 12708 | 9.76  | 11.49 | 5.67  | 0.944  | 0     | 0     | 27.86 |
| S116-ssRNA-RT-7 | 13246 | 5.44  | 13.74 | 6.79  | 0      | 0     | 1.359 | 27.33 |
| S117-dsRNA-1    | 13385 | 2.02  | 14.05 | 3.36  | 0      | 0     | 0     | 19.42 |
| S118-dsRNA-2    | 23564 | 1.61  | 12.39 | 3.06  | 0      | 0     | 0     | 17.06 |
| S119-dsRNA-3    | 19208 | 6.72  | 14.68 | 5.15  | 0      | 0     | 0     | 26.55 |
| S120-dsRNA-4    | 17448 | 9.46  | 14.10 | 4.13  | 0      | 0     | 0     | 27.68 |
| S121-dsRNA-5    | 29174 | 3.36  | 13.44 | 4.94  | 0.411  | 0     | 0     | 22.14 |
| S122-dsRNA-6    | 23015 | 4.17  | 11.21 | 3.52  | 0      | 0     | 0     | 18.90 |
| S123-dsRNA-7    | 24732 | 0.24  | 16.01 | 2.55  | 0      | 0     | 0     | 18.80 |
| S124-dsRNA-8    | 29339 | 11.45 | 10.98 | 5.52  | 0      | 0     | 0     | 27.95 |
| S125-dsRNA-9    | 25709 | 3.81  | 11.28 | 4.90  | 0      | 0     | 0     | 19.99 |

## Additional file 5 Continued

|                  |       |       |       |       |       |       |   |       |
|------------------|-------|-------|-------|-------|-------|-------|---|-------|
| S126-dsRNA-10    | 26164 | 0.96  | 14.45 | 3.21  | 0     | 0     | 0 | 18.61 |
| S127-dsRNA-11    | 20682 | 1.45  | 9.09  | 4.50  | 0     | 0     | 0 | 15.04 |
| S128-dsRNA-12    | 23433 | 1.19  | 12.03 | 3.07  | 0.512 | 0     | 0 | 16.81 |
| S129-dsRNA-13    | 5881  | 5.27  | 13.26 | 4.59  | 0     | 0     | 0 | 23.13 |
| S130-dsRNA-14    | 5898  | 1.02  | 10.17 | 3.05  | 0     | 0     | 0 | 14.24 |
| S131-dsRNA-15    | 6603  | 6.66  | 9.09  | 1.36  | 0     | 0     | 0 | 17.11 |
| S132-dsRNA-16    | 4579  | 1.53  | 11.79 | 1.97  | 0     | 0     | 0 | 15.29 |
| S133-dsRNA-17    | 6277  | 7.65  | 12.11 | 2.87  | 0     | 0     | 0 | 22.62 |
| S134-dsRNA-18    | 5284  | 6.81  | 16.28 | 5.11  | 0     | 0     | 0 | 28.20 |
| S135-dsRNA-19    | 6105  | 12.78 | 12.45 | 4.42  | 0     | 0     | 0 | 29.65 |
| S136-dsRNA-20    | 3663  | 3.82  | 13.10 | 3.28  | 0     | 0     | 0 | 20.20 |
| S137-dsRNA-21    | 12640 | 8.62  | 11.39 | 12.10 | 0     | 0     | 0 | 32.12 |
| S138-dsRNA-22    | 12734 | 2.28  | 8.48  | 3.53  | 0     | 0     | 0 | 14.29 |
| S139-dsRNA-23    | 17635 | 8.56  | 14.74 | 4.59  | 0     | 0     | 0 | 27.90 |
| S140-(-)ssRNA-1  | 8910  | 7.07  | 11.67 | 2.02  | 0     | 0     | 0 | 20.76 |
| S141-(-)ssRNA-2  | 11161 | 10.66 | 13.62 | 2.69  | 0     | 0     | 0 | 26.97 |
| S142-(-)ssRNA-3  | 11932 | 11.40 | 17.77 | 1.51  | 0     | 0     | 0 | 30.67 |
| S143-(-)ssRNA-4  | 14900 | 17.92 | 15.97 | 5.03  | 0.805 | 0     | 0 | 39.73 |
| S144-(-)ssRNA-5  | 12807 | 4.53  | 18.74 | 6.09  | 0     | 0     | 0 | 29.36 |
| S145-(-)ssRNA-6  | 12020 | 3.00  | 14.98 | 7.24  | 0     | 0     | 0 | 25.21 |
| S146-(-)ssRNA-7  | 11131 | 11.77 | 12.40 | 9.43  | 0     | 0     | 0 | 33.60 |
| S147-(-)ssRNA-8  | 19111 | 7.27  | 11.83 | 1.41  | 0     | 0     | 0 | 20.51 |
| S148-(-)ssRNA-9  | 18959 | 8.44  | 12.03 | 2.85  | 1.266 | 0     | 0 | 24.58 |
| S149-(-)ssRNA-10 | 15384 | 1.95  | 15.34 | 2.34  | 0     | 0     | 0 | 19.63 |
| S150-(-)ssRNA-11 | 15894 | 9.69  | 10.57 | 2.27  | 0     | 0     | 0 | 22.52 |
| S151-(-)ssRNA-12 | 15384 | 8.06  | 15.47 | 0.59  | 0     | 0     | 0 | 24.12 |
| S152-(-)ssRNA-13 | 18234 | 5.05  | 14.70 | 4.44  | 0     | 0     | 0 | 24.19 |
| S153-(-)ssRNA-14 | 15186 | 8.89  | 15.15 | 2.37  | 0     | 0     | 0 | 26.41 |
| S154-(-)ssRNA-15 | 15225 | 15.50 | 15.63 | 2.96  | 0     | 0     | 0 | 34.09 |
| S155-(-)ssRNA-16 | 14071 | 11.94 | 19.33 | 6.61  | 0     | 0     | 0 | 37.88 |
| S156-(-)ssRNA-17 | 12878 | 8.39  | 23.45 | 5.59  | 0     | 0     | 0 | 37.43 |
| S157-(-)ssRNA-18 | 11278 | 17.73 | 17.73 | 7.98  | 0     | 0     | 0 | 43.45 |
| S158-(-)ssRNA-19 | 13460 | 3.64  | 18.13 | 4.01  | 0     | 0     | 0 | 25.78 |
| S159-(-)ssRNA-20 | 12555 | 9.56  | 14.81 | 4.30  | 0     | 0     | 0 | 28.67 |
| S160-(-)ssRNA-21 | 10461 | 5.16  | 22.18 | 3.44  | 0     | 0     | 0 | 30.78 |
| S161-(-)ssRNA-22 | 14452 | 6.30  | 9.27  | 5.60  | 0.830 | 0     | 0 | 22.00 |
| S162-(-)ssRNA-23 | 12716 | 4.72  | 16.83 | 7.31  | 0.944 | 0     | 0 | 29.80 |
| S163-(-)ssRNA-24 | 12294 | 8.70  | 19.03 | 8.05  | 0.976 | 0     | 0 | 36.77 |
| S164-(-)ssRNA-25 | 11845 | 10.22 | 18.07 | 11.40 | 1.013 | 0     | 0 | 40.69 |
| S165-(-)ssRNA-26 | 18859 | 13.63 | 12.20 | 4.30  | 0     | 0     | 0 | 30.12 |
| S166-(-)ssRNA-27 | 11979 | 4.26  | 18.87 | 9.77  | 0     | 0     | 0 | 32.89 |
| S167-(-)ssRNA-28 | 16634 | 22.06 | 13.59 | 4.51  | 0     | 1.804 | 0 | 41.96 |
| S168-(-)ssRNA-29 | 17145 | 10.73 | 22.51 | 3.15  | 0     | 0     | 0 | 36.40 |

|                  |       |       |       |      |       |       |       |       |
|------------------|-------|-------|-------|------|-------|-------|-------|-------|
| S169-(-)ssRNA-30 | 10056 | 6.07  | 10.94 | 0.89 | 0     | 0     | 0     | 17.90 |
| S170-(-)ssRNA-31 | 1682  | 21.40 | 19.02 | 5.35 | 0     | 0     | 0     | 45.78 |
| S171-(+)ssRNA-1  | 3569  | 3.36  | 10.09 | 0.00 | 0     | 0     | 0     | 13.45 |
| S172-(+)ssRNA-2  | 4215  | 2.85  | 6.17  | 4.27 | 0     | 0     | 0     | 13.29 |
| S173-(+)ssRNA-3  | 2514  | 7.16  | 8.75  | 3.58 | 0     | 0     | 0     | 19.49 |
| S174-(+)ssRNA-4  | 2728  | 0.00  | 15.40 | 0.00 | 0     | 0     | 0     | 15.40 |
| S175-(+)ssRNA-5  | 7440  | 2.69  | 12.37 | 3.63 | 0     | 0     | 0     | 18.68 |
| S176-(+)ssRNA-6  | 7152  | 1.68  | 20.69 | 1.26 | 0     | 0     | 0     | 23.63 |
| S177-(+)ssRNA-7  | 7478  | 7.22  | 7.22  | 4.81 | 0     | 0     | 0     | 19.26 |
| S178-(+)ssRNA-8  | 7835  | 20.55 | 14.04 | 4.59 | 0     | 0     | 0     | 39.18 |
| S179-(+)ssRNA-9  | 8161  | 3.31  | 17.40 | 3.31 | 0     | 0     | 0     | 24.02 |
| S180-(+)ssRNA-10 | 7348  | 6.67  | 10.34 | 0.00 | 0     | 0     | 0     | 17.01 |
| S181-(+)ssRNA-11 | 8828  | 2.04  | 11.33 | 1.02 | 0     | 0     | 0     | 14.39 |
| S182-(+)ssRNA-12 | 8251  | 12.12 | 17.94 | 2.18 | 4.363 | 0     | 0     | 36.60 |
| S183-(+)ssRNA-13 | 7117  | 2.81  | 13.49 | 2.53 | 0     | 0     | 0     | 18.83 |
| S184-(+)ssRNA-14 | 9650  | 7.25  | 16.17 | 2.80 | 0     | 0     | 0     | 26.22 |
| S185-(+)ssRNA-15 | 9185  | 2.72  | 17.20 | 6.53 | 0     | 0     | 0     | 26.46 |
| S186-(+)ssRNA-16 | 8587  | 4.77  | 11.41 | 4.19 | 0     | 0     | 0     | 20.38 |
| S187-(+)ssRNA-17 | 9871  | 2.63  | 17.83 | 3.04 | 0     | 0     | 0     | 23.50 |
| S188-(+)ssRNA-18 | 12226 | 5.32  | 16.03 | 0.74 | 0     | 0     | 0     | 22.08 |
| S189-(+)ssRNA-19 | 12138 | 5.44  | 20.27 | 5.19 | 0     | 0     | 0     | 30.89 |
| S190-(+)ssRNA-20 | 10349 | 7.05  | 17.20 | 5.51 | 0     | 0     | 0     | 29.76 |
| S191-(+)ssRNA-21 | 9370  | 1.28  | 12.59 | 3.20 | 0     | 0     | 0     | 17.08 |
| S192-(+)ssRNA-22 | 9263  | 5.83  | 15.33 | 0.97 | 0     | 0     | 0     | 22.13 |
| S193-(+)ssRNA-23 | 11443 | 4.54  | 15.90 | 2.36 | 2.097 | 0     | 0     | 24.91 |
| S194-(+)ssRNA-24 | 9704  | 0.72  | 20.20 | 1.85 | 0     | 0     | 1.855 | 24.63 |
| S195-(+)ssRNA-25 | 9535  | 0.63  | 13.21 | 2.83 | 0     | 0     | 0     | 16.68 |
| S196-(+)ssRNA-26 | 11219 | 2.23  | 18.36 | 6.42 | 0     | 3.565 | 0     | 30.57 |
| S197-(+)ssRNA-27 | 10818 | 3.42  | 8.87  | 4.16 | 0     | 0     | 0     | 16.45 |
| S198-(+)ssRNA-28 | 9384  | 0.64  | 10.23 | 1.92 | 0     | 0     | 0     | 12.79 |
| S199-(+)ssRNA-29 | 8284  | 4.35  | 8.93  | 1.09 | 0     | 0     | 0     | 14.37 |
| S200-(+)ssRNA-30 | 7437  | 0.81  | 12.10 | 1.21 | 0     | 0     | 0     | 14.12 |
| S201-(+)ssRNA-31 | 7654  | 6.53  | 12.02 | 5.88 | 0     | 0     | 0     | 24.43 |
| S202-(+)ssRNA-32 | 7476  | 2.41  | 13.91 | 2.41 | 1.605 | 0     | 0     | 20.33 |
| S203-(+)ssRNA-33 | 7176  | 4.46  | 9.48  | 7.94 | 0     | 0     | 0     | 21.88 |
| S204-(+)ssRNA-34 | 6813  | 8.37  | 12.04 | 3.96 | 0     | 0     | 0     | 24.37 |
| S205-(+)ssRNA-35 | 7003  | 10.00 | 16.56 | 5.14 | 0     | 0     | 0     | 31.70 |
| S206-(+)ssRNA-36 | 4540  | 0.00  | 3.96  | 1.98 | 0     | 0     | 0     | 5.95  |
| S207-(+)ssRNA-37 | 4528  | 1.77  | 6.63  | 3.98 | 0     | 0     | 0     | 12.37 |
| S208-(+)ssRNA-38 | 6625  | 4.53  | 9.06  | 7.70 | 0     | 0     | 0     | 21.28 |
| S209-(+)ssRNA-39 | 4194  | 2.86  | 16.21 | 4.29 | 0     | 0     | 0     | 23.37 |
| S210-(+)ssRNA-40 | 5677  | 5.64  | 13.74 | 4.76 | 2.114 | 0     | 0     | 26.25 |
| S211-(+)ssRNA-41 | 5987  | 1.00  | 10.69 | 4.51 | 0     | 0     | 0     | 16.20 |

## Additional file 5 Continued

|                  |       |       |       |       |       |   |       |       |
|------------------|-------|-------|-------|-------|-------|---|-------|-------|
| S212-(+)ssRNA-42 | 5706  | 5.78  | 5.61  | 3.15  | 0     | 0 | 0     | 14.55 |
| S213-(+)ssRNA-43 | 4776  | 2.51  | 19.68 | 1.88  | 0     | 0 | 0     | 24.08 |
| S214-(+)ssRNA-44 | 4003  | 6.74  | 18.49 | 0.00  | 0     | 0 | 0     | 25.23 |
| S215-(+)ssRNA-45 | 3684  | 7.06  | 8.14  | 11.40 | 0     | 0 | 0     | 26.60 |
| S216-(+)ssRNA-46 | 5243  | 1.14  | 10.30 | 0.00  | 0     | 0 | 0     | 11.44 |
| S217-(+)ssRNA-47 | 4437  | 1.35  | 19.38 | 2.03  | 0     | 0 | 0     | 25.47 |
| S218-(+)ssRNA-48 | 4114  | 4.38  | 15.07 | 0.00  | 0     | 0 | 0     | 16.53 |
| S219-(+)ssRNA-49 | 4354  | 5.51  | 14.24 | 6.20  | 0     | 0 | 0     | 25.95 |
| S220-(+)ssRNA-50 | 4326  | 6.24  | 12.48 | 6.24  | 0     | 0 | 0     | 24.97 |
| S221-(+)ssRNA-51 | 12704 | 0.55  | 13.70 | 7.79  | 0     | 0 | 0     | 22.04 |
| S222-(+)ssRNA-52 | 27608 | 2.21  | 14.85 | 4.56  | 0     | 0 | 0     | 21.62 |
| S223-(+)ssRNA-53 | 28475 | 8.74  | 10.82 | 4.42  | 0     | 0 | 0     | 23.99 |
| S224-(+)ssRNA-54 | 26253 | 1.37  | 22.32 | 5.03  | 0     | 0 | 0     | 28.72 |
| S225-(+)ssRNA-55 | 10862 | 5.52  | 16.57 | 4.14  | 0     | 0 | 0     | 26.24 |
| S226-(+)ssRNA-56 | 12573 | 9.15  | 15.43 | 7.40  | 0     | 0 | 0     | 31.97 |
| S227-(+)ssRNA-57 | 9646  | 20.63 | 10.16 | 3.73  | 0     | 0 | 0     | 34.52 |
| S228-(+)ssRNA-58 | 11703 | 4.19  | 8.72  | 3.85  | 1.025 | 0 | 0     | 17.77 |
| S229-(+)ssRNA-59 | 9755  | 9.94  | 30.55 | 9.23  | 0     | 0 | 0     | 49.72 |
| S230-(+)ssRNA-60 | 6395  | 7.51  | 20.33 | 4.69  | 0     | 0 | 0     | 32.53 |
| S231-(+)ssRNA-61 | 10646 | 5.07  | 14.65 | 6.20  | 0     | 0 | 0     | 25.93 |
| S232-(+)ssRNA-62 | 10221 | 7.92  | 9.39  | 6.16  | 0     | 0 | 0     | 23.48 |
| S233-(+)ssRNA-63 | 10692 | 5.89  | 14.03 | 8.98  | 0     | 0 | 0     | 28.90 |
| S234-(+)ssRNA-64 | 12141 | 11.70 | 11.53 | 7.17  | 0     | 0 | 0     | 30.39 |
| S235-(+)ssRNA-65 | 10401 | 6.44  | 19.61 | 9.81  | 0     | 0 | 0     | 35.86 |
| S236-(+)ssRNA-66 | 15914 | 1.51  | 12.94 | 10.18 | 0     | 0 | 1.131 | 25.76 |
| S237-(+)ssRNA-67 | 8274  | 4.71  | 11.84 | 2.18  | 0     | 0 | 0     | 18.73 |
| S238-(+)ssRNA-68 | 8622  | 2.78  | 16.93 | 2.09  | 0     | 0 | 0     | 21.80 |
| S239-(+)ssRNA-69 | 8210  | 3.41  | 18.03 | 6.94  | 0     | 0 | 0     | 28.38 |
| S240-(+)ssRNA-70 | 8623  | 2.90  | 16.47 | 5.22  | 0     | 0 | 0     | 24.59 |
| S241-(+)ssRNA-71 | 8301  | 8.91  | 9.64  | 3.25  | 0     | 0 | 0     | 21.80 |
| S242-(+)ssRNA-72 | 4852  | 3.92  | 6.18  | 6.18  | 0     | 0 | 0     | 16.28 |
| S243-(+)ssRNA-73 | 7680  | 2.47  | 16.93 | 2.34  | 0     | 0 | 0     | 21.74 |
| S244-(+)ssRNA-74 | 7564  | 32.79 | 7.93  | 13.88 | 0     | 0 | 0     | 54.60 |
| S245-(+)ssRNA-75 | 6318  | 8.86  | 9.50  | 1.42  | 0     | 0 | 0     | 19.78 |
| S246-(+)ssRNA-76 | 6305  | 3.97  | 11.42 | 4.28  | 0     | 0 | 0     | 19.67 |
| S247-(+)ssRNA-77 | 15480 | 4.65  | 12.92 | 3.68  | 0     | 0 | 0     | 21.25 |
| S248-(+)ssRNA-78 | 15311 | 4.38  | 14.37 | 4.31  | 0.784 | 0 | 0     | 23.84 |
| S249-(+)ssRNA-79 | 17919 | 5.36  | 11.61 | 4.02  | 0     | 0 | 0     | 20.98 |
| S250-(+)ssRNA-80 | 6435  | 0.93  | 12.12 | 5.59  | 0     | 0 | 0     | 18.65 |
| S251-(+)ssRNA-81 | 7560  | 0.93  | 23.02 | 7.14  | 1.587 | 0 | 0     | 32.67 |
| S252-(+)ssRNA-82 | 8832  | 1.59  | 14.27 | 0.00  | 0     | 0 | 0     | 15.85 |
| S253-(+)ssRNA-83 | 9306  | 3.33  | 13.32 | 3.87  | 0     | 0 | 0     | 20.52 |
| S254-(+)ssRNA-84 | 6495  | 10.62 | 9.24  | 1.39  | 1.848 | 0 | 0     | 23.09 |

Additional file 5 Continued

|                  |      |      |       |      |   |   |   |       |
|------------------|------|------|-------|------|---|---|---|-------|
| S255-(+)ssRNA-85 | 7351 | 0.82 | 11.97 | 2.45 | 0 | 0 | 0 | 15.24 |
| S256-(+)ssRNA-86 | 7555 | 7.81 | 15.09 | 3.57 | 0 | 0 | 0 | 26.47 |
| S257-(+)ssRNA-87 | 4009 | 3.24 | 5.99  | 6.73 | 0 | 0 | 0 | 15.96 |
