# Supplementary material for: Coevolution between simple sequence repeats (SSRs) and virus genome size
Source: PubMed Central journal article supplement (PMC3585866; doi:10.1186/1471-2164-13-435), 2012-08-30
Supplement: 1471-2164-13-435-S6.pdf [file 1471-2164-13-435-S6.pdf]

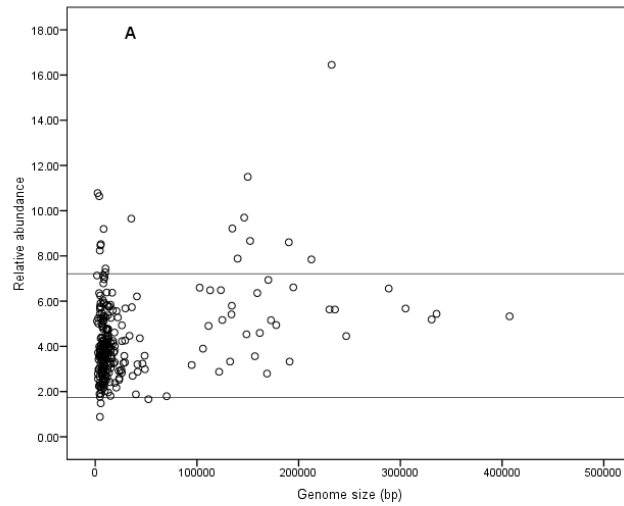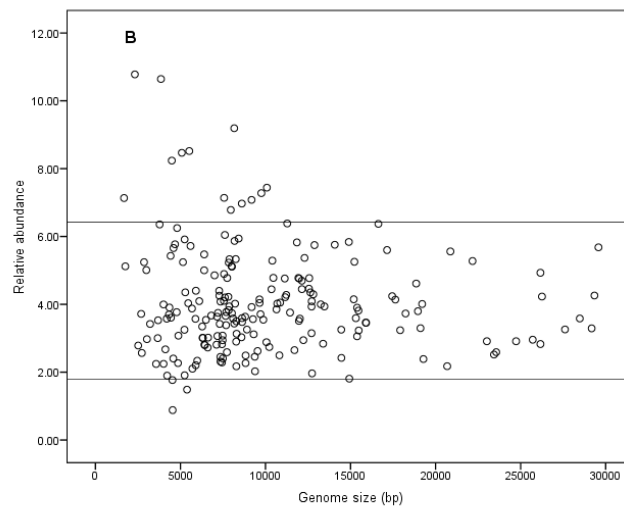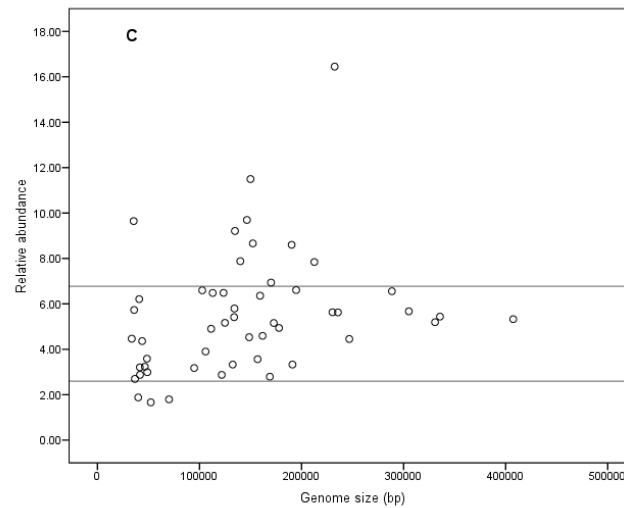

**Additional file 13 Scatter plots of SSRs relative abundance versus genome size.**

(A) Scatter plot of SSRs relative abundances in all analysed virus genomes. (B) Scatter plot of

SSRs relative abundances in analysed virus genomes with size of  $< 30000$  bp. (C) Scatter plot of SSRs relative abundances in analysed virus genomes with size of  $> 30000$  bp.
