# Supplementary material for: Coevolution between simple sequence repeats (SSRs) and virus genome size
Source: PubMed Central journal article supplement (PMC3585866; doi:10.1186/1471-2164-13-435), 2012-08-30
Supplement: 1471-2164-13-435-S8.pdf [file 1471-2164-13-435-S8.pdf]

## Additional file 6 Descriptive statistics of SSRs variables

| Parameters | Mean   | Std. deviation | Minimum | Maximum |
|------------|--------|----------------|---------|---------|
| Mono-      | 76.008 | 191.514        | 0       | 1383    |
| Di-        | 99.035 | 222.988        | 2       | 1855    |
| Tri-       | 26.673 | 70.186         | 0       | 555     |
| Tetra-     | 1.066  | 3.184          | 0       | 22      |
| Penta-     | 1.187  | 0.693          | 0       | 6       |
| Hexa-      | 0.486  | 2.714          | 0       | 27      |
