# Supplementary material for: Coevolution between simple sequence repeats (SSRs) and virus genome size
Source: PubMed Central journal article supplement (PMC3585866; doi:10.1186/1471-2164-13-435), 2012-08-30
Supplement: 1471-2164-13-435-S9.pdf [file 1471-2164-13-435-S9.pdf]

## Additional file 7 Matrix of correlation coefficients and 1-tailed tests

### between SSRs

|        | <b>Mono-</b>       | <b>Di-</b> | <b>Tri-</b> | <b>Tetra-</b> | <b>Penta-</b> | <b>Hexa-</b> |
|--------|--------------------|------------|-------------|---------------|---------------|--------------|
| Mono-  |                    | **         | **          | **            | **            | **           |
| Di-    | 0.790 <sup>a</sup> |            | **          | **            | **            | **           |
| Tri-   | 0.742              | 0.867      |             | **            | **            | **           |
| Tetra- | 0.698              | 0.796      | 0.771       |               | **            | **           |
| Penta- | 0.662              | 0.639      | 0.504       | 0.594         |               | **           |
| Hexa-  | 0.356              | 0.416      | 0.375       | 0.319         | 0.265         |              |

<sup>a</sup> Correlation coefficients between repeat classes.

\*\* Represents extremely significant difference ( $P < 0.001$ ) between variables.
