# Supplementary material for: Coevolution between simple sequence repeats (SSRs) and virus genome size
Source: PubMed Central journal article supplement (PMC3585866; doi:10.1186/1471-2164-13-435), 2012-08-30
Supplement: 1471-2164-13-435-S10.pdf [file 1471-2164-13-435-S10.pdf]

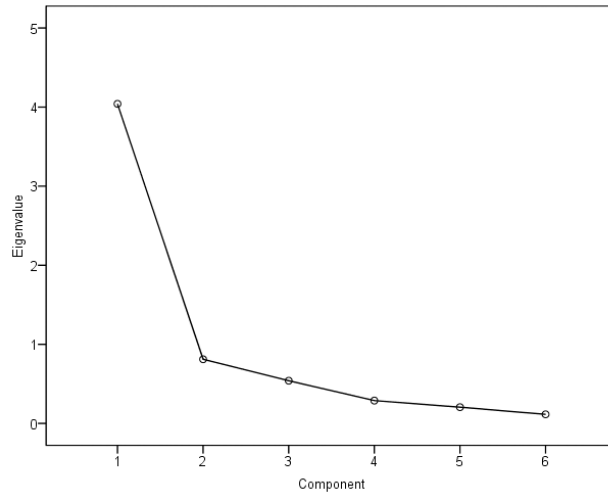

**Additional file 15 Scree plot.**

It displays the "cliff" and the "screens" vividly, which can be visually proved that the applicability of PCA is very good to the current data set.
