# Supplementary material for: Coevolution between simple sequence repeats (SSRs) and virus genome size
Source: PubMed Central journal article supplement (PMC3585866; doi:10.1186/1471-2164-13-435), 2012-08-30
Supplement: 1471-2164-13-435-S11.pdf [file 1471-2164-13-435-S11.pdf]

## Additional file 8 Occurrence of mono- SSRs in analyzed virus genomes

| No. Type     | Repeated motifs |    |    |       | Total mono- | A+T (%) | C+G (%) |
|--------------|-----------------|----|----|-------|-------------|---------|---------|
|              | A               | C  | G  | T (U) |             |         |         |
| S1-dsDNA-1   | 79              | 0  | 0  | 112   | 191         | 100.00  | 0       |
| S2-dsDNA-2   | 60              | 5  | 3  | 71    | 139         | 94.24   | 5.76    |
| S3-dsDNA-3   | 34              | 0  | 2  | 37    | 73          | 97.26   | 2.74    |
| S4-dsDNA-4   | 30              | 3  | 6  | 16    | 55          | 83.64   | 16.36   |
| S5-dsDNA-5   | 90              | 3  | 4  | 52    | 149         | 95.30   | 4.70    |
| S6-dsDNA-6   | 40              | 2  | 5  | 36    | 83          | 91.57   | 8.43    |
| S7-dsDNA-7   | 35              | 0  | 2  | 29    | 66          | 96.97   | 3.03    |
| S8-dsDNA-8   | 33              | 4  | 0  | 63    | 100         | 96.00   | 4.00    |
| S9-dsDNA-9   | 32              | 1  | 1  | 30    | 64          | 96.88   | 3.13    |
| S10-dsDNA-10 | 1               | 10 | 2  | 0     | 13          | 7.69    | 92.31   |
| S11-dsDNA-11 | 34              | 1  | 1  | 36    | 72          | 97.22   | 2.78    |
| S12-dsDNA-12 | 0               | 2  | 8  | 1     | 11          | 9.09    | 90.91   |
| S13-dsDNA-13 | 0               | 0  | 0  | 1     | 1           | 100.00  | 0       |
| S14-dsDNA-14 | 2               | 0  | 0  | 3     | 5           | 100.00  | 0       |
| S15-dsDNA-15 | 23              | 0  | 3  | 20    | 46          | 93.48   | 6.52    |
| S16-dsDNA-16 | 11              | 1  | 0  | 13    | 25          | 96.00   | 4.00    |
| S17-dsDNA-17 | 12              | 0  | 0  | 3     | 15          | 100.00  | 0.00    |
| S18-dsDNA-18 | 24              | 0  | 2  | 10    | 36          | 94.44   | 5.56    |
| S19-dsDNA-19 | 17              | 0  | 0  | 4     | 21          | 100.00  | 0       |
| S20-dsDNA-20 | 53              | 2  | 2  | 71    | 128         | 96.88   | 3.13    |
| S21-dsDNA-21 | 25              | 2  | 1  | 16    | 44          | 93.18   | 6.82    |
| S22-dsDNA-22 | 98              | 0  | 0  | 95    | 193         | 100.00  | 0       |
| S23-dsDNA-23 | 8               | 0  | 0  | 12    | 20          | 100.00  | 0       |
| S24-dsDNA-24 | 2               | 0  | 0  | 3     | 5           | 100.00  | 0       |
| S25-dsDNA-25 | 237             | 0  | 2  | 256   | 495         | 99.60   | 0.40    |
| S26-dsDNA-26 | 18              | 7  | 8  | 17    | 50          | 70.00   | 30.00   |
| S27-dsDNA-27 | 379             | 5  | 5  | 335   | 724         | 98.62   | 1.38    |
| S28-dsDNA-28 | 598             | 2  | 0  | 507   | 1107        | 99.82   | 0.18    |
| S29-dsDNA-29 | 138             | 13 | 10 | 134   | 295         | 92.20   | 7.80    |
| S30-dsDNA-30 | 275             | 0  | 1  | 260   | 536         | 99.81   | 0.19    |
| S31-dsDNA-31 | 47              | 15 | 23 | 38    | 123         | 69.11   | 30.89   |
| S32-dsDNA-32 | 432             | 4  | 2  | 398   | 836         | 99.28   | 0.72    |
| S33-dsDNA-33 | 613             | 2  | 4  | 764   | 1383        | 99.57   | 0.43    |
| S34-dsDNA-34 | 384             | 15 | 28 | 360   | 787         | 94.54   | 5.46    |
| S35-dsDNA-35 | 476             | 10 | 2  | 566   | 1054        | 98.86   | 1.14    |
| S36-dsDNA-36 | 135             | 7  | 12 | 132   | 286         | 93.36   | 6.64    |
| S37-dsDNA-37 | 27              | 23 | 13 | 27    | 90          | 60.00   | 40.00   |
| S38-dsDNA-38 | 174             | 1  | 0  | 230   | 405         | 99.75   | 0.25    |
| S39-dsDNA-39 | 21              | 13 | 6  | 24    | 64          | 70.31   | 29.69   |

## Additional file 8 Continued

|              |     |     |     |     |     |        |       |
|--------------|-----|-----|-----|-----|-----|--------|-------|
| S40-dsDNA-40 | 381 | 29  | 24  | 388 | 822 | 93.55  | 6.45  |
| S41-dsDNA-41 | 196 | 47  | 53  | 193 | 489 | 79.55  | 20.45 |
| S42-dsDNA-42 | 373 | 18  | 14  | 363 | 768 | 95.83  | 4.17  |
| S43-dsDNA-43 | 161 | 1   | 3   | 141 | 306 | 98.69  | 1.31  |
| S44-dsDNA-44 | 101 | 11  | 8   | 86  | 206 | 90.78  | 9.22  |
| S45-dsDNA-45 | 295 | 18  | 11  | 198 | 522 | 94.44  | 5.56  |
| S46-dsDNA-46 | 63  | 68  | 81  | 70  | 282 | 47.16  | 52.84 |
| S47-dsDNA-47 | 33  | 290 | 310 | 30  | 663 | 9.50   | 90.50 |
| S48-dsDNA-48 | 80  | 58  | 46  | 99  | 283 | 63.25  | 36.75 |
| S49-dsDNA-49 | 126 | 56  | 53  | 113 | 348 | 68.68  | 31.32 |
| S50-dsDNA-50 | 76  | 36  | 30  | 103 | 245 | 73.06  | 26.94 |
| S51-dsDNA-51 | 129 | 46  | 48  | 120 | 343 | 72.59  | 27.41 |
| S52-dsDNA-52 | 49  | 60  | 63  | 67  | 239 | 48.54  | 51.46 |
| S53-dsDNA-53 | 231 | 15  | 26  | 225 | 497 | 91.75  | 8.25  |
| S54-dsDNA-54 | 18  | 166 | 210 | 26  | 420 | 10.48  | 89.52 |
| S55-dsDNA-55 | 182 | 2   | 3   | 167 | 354 | 98.59  | 1.41  |
| S56-dsDNA-56 | 24  | 13  | 14  | 17  | 68  | 60.29  | 39.71 |
| S57-dsDNA-57 | 17  | 12  | 8   | 10  | 47  | 57.45  | 42.55 |
| S58-dsDNA-58 | 56  | 2   | 0   | 54  | 112 | 98.21  | 1.79  |
| S59-dsDNA-59 | 31  | 2   | 1   | 39  | 73  | 95.89  | 4.11  |
| S60-dsDNA-60 | 10  | 1   | 0   | 10  | 21  | 95.24  | 4.76  |
| S61-dsDNA-61 | 6   | 1   | 1   | 7   | 15  | 86.67  | 13.33 |
| S62-dsDNA-62 | 5   | 2   | 3   | 6   | 16  | 68.75  | 31.25 |
| S63-dsDNA-63 | 3   | 1   | 1   | 4   | 9   | 77.78  | 22.22 |
| S64-dsDNA-64 | 6   | 1   | 3   | 3   | 13  | 69.23  | 30.77 |
| S65-dsDNA-65 | 9   | 2   | 3   | 6   | 20  | 75.00  | 25.00 |
| S66-dsDNA-66 | 4   | 6   | 10  | 7   | 27  | 40.74  | 59.26 |
| S67-dsDNA-67 | 3   | 1   | 3   | 1   | 8   | 50.00  | 50.00 |
| S68-dsDNA-68 | 1   | 1   | 2   | 2   | 6   | 50.00  | 50.00 |
| S69-dsDNA-69 | 2   | 5   | 2   | 1   | 10  | 30.00  | 70.00 |
| S70-dsDNA-70 | 3   | 3   | 5   | 6   | 17  | 52.94  | 47.06 |
| S71-dsDNA-71 | 10  | 3   | 4   | 14  | 31  | 77.42  | 22.58 |
| S72-dsDNA-72 | 6   | 0   | 0   | 5   | 11  | 100.00 | 0     |
| S73-dsDNA-73 | 1   | 0   | 4   | 6   | 11  | 63.64  | 36.36 |
| S74-dsDNA-74 | 4   | 2   | 1   | 4   | 11  | 72.73  | 27.27 |
| S75-dsDNA-75 | 3   | 2   | 3   | 3   | 11  | 54.55  | 45.45 |
| S76-dsDNA-76 | 213 | 5   | 2   | 249 | 469 | 98.51  | 1.49  |
| S77-dsDNA-77 | 38  | 2   | 0   | 38  | 78  | 97.44  | 2.56  |
| S78-ssDNA-1  | 5   | 0   | 0   | 1   | 6   | 100.00 | 0     |
| S79-ssDNA-2  | 16  | 0   | 0   | 0   | 16  | 100.00 | 0     |
| S80-ssDNA-3  | 1   | 0   | 0   | 3   | 4   | 100.00 | 0     |
| S81-ssDNA-4  | 11  | 0   | 0   | 4   | 15  | 100.00 | 0     |
| S82-ssDNA-5  | 14  | 1   | 0   | 0   | 15  | 93.33  | 6.67  |

Additional file 8 Continued

|                 |    |    |    |    |    |        |        |
|-----------------|----|----|----|----|----|--------|--------|
| S83-ssDNA-6     | 1  | 0  | 0  | 5  | 6  | 100.00 | 0      |
| S84-ssDNA-7     | 1  | 0  | 1  | 1  | 3  | 66.67  | 33.33  |
| S85-ssDNA-8     | 2  | 0  | 0  | 2  | 4  | 100.00 | 0      |
| S86-ssDNA-9     | 1  | 0  | 1  | 2  | 4  | 75.00  | 25.00  |
| S87-ssDNA-10    | 1  | 0  | 1  | 3  | 5  | 80.00  | 20.00  |
| S88-ssDNA-11    | 0  | 1  | 1  | 2  | 4  | 50.00  | 50.00  |
| S89-ssDNA-12    | 0  | 7  | 10 | 0  | 17 | 0      | 100.00 |
| S90-ssDNA-13    | 8  | 7  | 5  | 2  | 22 | 45.45  | 54.55  |
| S91-ssDNA-14    | 1  | 0  | 0  | 1  | 2  | 100.00 | 0      |
| S92-ssDNA-15    | 5  | 2  | 0  | 0  | 7  | 71.43  | 28.57  |
| S93-ssDNA-16    | 8  | 0  | 0  | 4  | 12 | 100.00 | 0      |
| S94-ssDNA-17    | 8  | 0  | 3  | 5  | 16 | 81.25  | 18.75  |
| S95-ssDNA-18    | 1  | 0  | 0  | 1  | 2  | 100.00 | 0      |
| S96-ssDNA-19    | 4  | 0  | 2  | 1  | 7  | 71.43  | 28.57  |
| S97-ssDNA-20    | 9  | 0  | 5  | 0  | 14 | 64.29  | 35.71  |
| S98-ssDNA-21    | 5  | 0  | 0  | 2  | 7  | 100.00 | 0      |
| S99-ssDNA-22    | 8  | 2  | 2  | 4  | 16 | 75.00  | 25.00  |
| S100-ssDNA-23   | 8  | 0  | 0  | 1  | 9  | 100.00 | 0      |
| S101-ssDNA-24   | 5  | 0  | 0  | 1  | 6  | 100.00 | 0      |
| S102-dsDNA-RT-1 | 1  | 0  | 0  | 1  | 2  | 100.00 | 0      |
| S103-dsDNA-RT-2 | 0  | 0  | 0  | 0  | 0  | 0      | 0      |
| S104-dsDNA-RT-3 | 7  | 0  | 1  | 0  | 8  | 87.50  | 12.50  |
| S105-dsDNA-RT-4 | 32 | 0  | 0  | 0  | 32 | 100.00 | 0      |
| S106-dsDNA-RT-5 | 36 | 0  | 0  | 0  | 36 | 100.00 | 0      |
| S107-dsDNA-RT-6 | 15 | 0  | 1  | 0  | 16 | 93.75  | 6.25   |
| S108-dsDNA-RT-7 | 0  | 1  | 0  | 0  | 1  | 0      | 100.00 |
| S109-dsDNA-RT-8 | 8  | 2  | 0  | 3  | 13 | 84.62  | 15.38  |
| S110-ssRNA-RT-1 | 7  | 4  | 0  | 1  | 12 | 66.67  | 33.33  |
| S111-ssRNA-RT-2 | 1  | 7  | 2  | 1  | 11 | 18.18  | 81.82  |
| S112-ssRNA-RT-3 | 1  | 1  | 3  | 0  | 5  | 20.00  | 80.00  |
| S113-ssRNA-RT-4 | 5  | 12 | 1  | 4  | 22 | 40.91  | 59.09  |
| S114-ssRNA-RT-5 | 14 | 0  | 5  | 2  | 21 | 76.19  | 23.81  |
| S115-ssRNA-RT-6 | 10 | 3  | 1  | 6  | 20 | 80.00  | 20.00  |
| S116-ssRNA-RT-7 | 10 | 1  | 0  | 1  | 12 | 91.67  | 8.33   |
| S117-dsRNA-1    | 3  | 0  | 1  | 0  | 4  | 75.00  | 25.00  |
| S118-dsRNA-2    | 0  | 1  | 5  | 0  | 6  | 0      | 100.00 |
| S119-dsRNA-3    | 12 | 0  | 3  | 6  | 21 | 85.71  | 14.29  |
| S120-dsRNA-4    | 17 | 0  | 0  | 10 | 27 | 100.00 | 0      |
| S121-dsRNA-5    | 2  | 3  | 2  | 9  | 16 | 68.75  | 31.25  |
| S122-dsRNA-6    | 0  | 14 | 1  | 0  | 15 | 0      | 100.00 |
| S123-dsRNA-7    | 0  | 0  | 1  | 0  | 1  | 0      | 100.00 |
| S124-dsRNA-8    | 22 | 0  | 0  | 33 | 55 | 100.00 | 0      |
| S125-dsRNA-9    | 11 | 0  | 0  | 5  | 16 | 100.00 | 0      |

## Additional file 8 Continued

|                  |    |   |   |    |    |        |        |
|------------------|----|---|---|----|----|--------|--------|
| S126-dsRNA-10    | 0  | 2 | 2 | 0  | 4  | 0      | 100.00 |
| S127-dsRNA-11    | 3  | 1 | 0 | 1  | 5  | 80.00  | 20.00  |
| S128-dsRNA-12    | 1  | 3 | 0 | 0  | 4  | 25.00  | 75.00  |
| S129-dsRNA-13    | 0  | 4 | 1 | 0  | 5  | 0      | 100.00 |
| S130-dsRNA-14    | 0  | 1 | 0 | 0  | 1  | 0      | 100.00 |
| S131-dsRNA-15    | 1  | 3 | 1 | 2  | 7  | 42.86  | 57.14  |
| S132-dsRNA-16    | 0  | 1 | 0 | 0  | 1  | 0      | 100.00 |
| S133-dsRNA-17    | 2  | 1 | 4 | 0  | 7  | 28.57  | 71.43  |
| S134-dsRNA-18    | 3  | 0 | 1 | 2  | 6  | 83.33  | 16.67  |
| S135-dsRNA-19    | 3  | 2 | 1 | 4  | 10 | 70.00  | 30.00  |
| S136-dsRNA-20    | 0  | 0 | 0 | 2  | 2  | 100.00 | 0      |
| S137-dsRNA-21    | 9  | 0 | 1 | 7  | 17 | 94.12  | 5.88   |
| S138-dsRNA-22    | 1  | 1 | 0 | 0  | 2  | 50.00  | 50.00  |
| S139-dsRNA-23    | 17 | 3 | 2 | 1  | 23 | 78.26  | 21.74  |
| S140-(-)ssRNA-1  | 6  | 0 | 4 | 0  | 10 | 60.00  | 40.00  |
| S141-(-)ssRNA-2  | 9  | 2 | 0 | 8  | 19 | 89.47  | 10.53  |
| S142-(-)ssRNA-3  | 11 | 1 | 5 | 4  | 21 | 71.43  | 28.57  |
| S143-(-)ssRNA-4  | 34 | 0 | 2 | 5  | 41 | 95.12  | 4.88   |
| S144-(-)ssRNA-5  | 6  | 1 | 2 | 0  | 9  | 66.67  | 33.33  |
| S145-(-)ssRNA-6  | 2  | 0 | 3 | 1  | 6  | 50.00  | 50.00  |
| S146-(-)ssRNA-7  | 15 | 2 | 1 | 2  | 20 | 85.00  | 15.00  |
| S147-(-)ssRNA-8  | 13 | 2 | 0 | 8  | 23 | 91.30  | 8.70   |
| S148-(-)ssRNA-9  | 17 | 1 | 0 | 8  | 26 | 96.15  | 3.85   |
| S149-(-)ssRNA-10 | 1  | 2 | 2 | 0  | 5  | 20.00  | 80.00  |
| S150-(-)ssRNA-11 | 8  | 7 | 6 | 3  | 24 | 45.83  | 54.17  |
| S151-(-)ssRNA-12 | 11 | 1 | 4 | 4  | 20 | 75.00  | 25.00  |
| S152-(-)ssRNA-13 | 6  | 1 | 2 | 6  | 15 | 80.00  | 20.00  |
| S153-(-)ssRNA-14 | 10 | 5 | 5 | 2  | 22 | 54.55  | 45.45  |
| S154-(-)ssRNA-15 | 34 | 0 | 0 | 3  | 37 | 100.00 | 0      |
| S155-(-)ssRNA-16 | 19 | 0 | 3 | 5  | 27 | 88.89  | 11.11  |
| S156-(-)ssRNA-17 | 13 | 1 | 1 | 2  | 17 | 88.24  | 11.76  |
| S157-(-)ssRNA-18 | 7  | 0 | 0 | 24 | 31 | 100.00 | 0      |
| S158-(-)ssRNA-19 | 4  | 0 | 2 | 2  | 8  | 75.00  | 25.00  |
| S159-(-)ssRNA-20 | 17 | 0 | 0 | 3  | 20 | 100.00 | 0      |
| S160-(-)ssRNA-21 | 6  | 1 | 1 | 1  | 9  | 77.78  | 22.22  |
| S161-(-)ssRNA-22 | 12 | 0 | 2 | 1  | 15 | 86.67  | 13.33  |
| S162-(-)ssRNA-23 | 4  | 0 | 1 | 2  | 7  | 85.71  | 14.29  |
| S163-(-)ssRNA-24 | 16 | 0 | 0 | 1  | 17 | 100.00 | 0      |
| S164-(-)ssRNA-25 | 6  | 1 | 1 | 11 | 19 | 89.47  | 10.53  |
| S165-(-)ssRNA-26 | 29 | 0 | 2 | 9  | 40 | 95.00  | 5.00   |
| S166-(-)ssRNA-27 | 1  | 4 | 3 | 0  | 8  | 12.50  | 87.50  |
| S167-(-)ssRNA-28 | 34 | 0 | 1 | 24 | 59 | 98.31  | 1.69   |
| S168-(-)ssRNA-29 | 16 | 1 | 0 | 11 | 28 | 96.43  | 3.57   |

## Additional file 8 Continued

|                  |   |    |   |    |    |        |        |
|------------------|---|----|---|----|----|--------|--------|
| S169-(-)ssRNA-30 | 4 | 1  | 3 | 2  | 10 | 60.00  | 40.00  |
| S170-(-)ssRNA-31 | 1 | 4  | 1 | 0  | 6  | 16.67  | 83.33  |
| S171-(+)ssRNA-1  | 0 | 1  | 1 | 0  | 2  | 0      | 100.00 |
| S172-(+)ssRNA-2  | 0 | 1  | 1 | 0  | 2  | 0      | 100.00 |
| S173-(+)ssRNA-3  | 0 | 1  | 2 | 0  | 3  | 0      | 100.00 |
| S174-(+)ssRNA-4  | 0 | 0  | 0 | 0  | 0  | 0      | 0      |
| S175-(+)ssRNA-5  | 2 | 1  | 0 | 0  | 3  | 66.67  | 33.33  |
| S176-(+)ssRNA-6  | 1 | 0  | 1 | 0  | 2  | 50.00  | 50.00  |
| S177-(+)ssRNA-7  | 3 | 0  | 1 | 5  | 9  | 88.89  | 11.11  |
| S178-(+)ssRNA-8  | 1 | 6  | 0 | 1  | 8  | 25.00  | 75.00  |
| S179-(+)ssRNA-9  | 1 | 1  | 0 | 0  | 2  | 50.00  | 50.00  |
| S180-(+)ssRNA-10 | 4 | 0  | 1 | 1  | 6  | 83.33  | 16.67  |
| S181-(+)ssRNA-11 | 1 | 2  | 0 | 0  | 3  | 33.33  | 66.67  |
| S182-(+)ssRNA-12 | 0 | 15 | 1 | 0  | 16 | 0      | 100.00 |
| S183-(+)ssRNA-13 | 1 | 1  | 0 | 0  | 2  | 50.00  | 50.00  |
| S184-(+)ssRNA-14 | 4 | 1  | 0 | 6  | 11 | 90.91  | 9.09   |
| S185-(+)ssRNA-15 | 2 | 0  | 0 | 2  | 4  | 100.00 | 0      |
| S186-(+)ssRNA-16 | 1 | 1  | 0 | 4  | 6  | 83.33  | 16.67  |
| S187-(+)ssRNA-17 | 1 | 1  | 1 | 1  | 4  | 50.00  | 50.00  |
| S188-(+)ssRNA-18 | 1 | 1  | 1 | 0  | 3  | 33.33  | 66.67  |
| S189-(+)ssRNA-19 | 1 | 3  | 1 | 6  | 11 | 63.64  | 36.36  |
| S190-(+)ssRNA-20 | 2 | 0  | 0 | 10 | 12 | 100.00 | 0      |
| S191-(+)ssRNA-21 | 0 | 0  | 0 | 2  | 2  | 100.00 | 0      |
| S192-(+)ssRNA-22 | 3 | 0  | 1 | 5  | 9  | 88.89  | 11.11  |
| S193-(+)ssRNA-23 | 1 | 3  | 0 | 4  | 8  | 62.50  | 37.50  |
| S194-(+)ssRNA-24 | 1 | 0  | 0 | 0  | 1  | 100.00 | 0      |
| S195-(+)ssRNA-25 | 1 | 0  | 0 | 0  | 1  | 100.00 | 0      |
| S196-(+)ssRNA-26 | 1 | 2  | 1 | 0  | 4  | 25.00  | 75.00  |
| S197-(+)ssRNA-27 | 5 | 0  | 1 | 0  | 6  | 83.33  | 16.67  |
| S198-(+)ssRNA-28 | 1 | 0  | 0 | 0  | 1  | 100.00 | 0      |
| S199-(+)ssRNA-29 | 3 | 2  | 0 | 0  | 5  | 60.00  | 40.00  |
| S200-(+)ssRNA-30 | 0 | 0  | 1 | 0  | 1  | 0      | 100.00 |
| S201-(+)ssRNA-31 | 0 | 6  | 2 | 0  | 8  | 0      | 100.00 |
| S202-(+)ssRNA-32 | 0 | 3  | 0 | 0  | 3  | 0      | 100.00 |
| S203-(+)ssRNA-33 | 1 | 4  | 0 | 0  | 5  | 20.00  | 80.00  |
| S204-(+)ssRNA-34 | 6 | 0  | 1 | 2  | 9  | 88.89  | 11.11  |
| S205-(+)ssRNA-35 | 5 | 0  | 0 | 6  | 11 | 100.00 | 0      |
| S206-(+)ssRNA-36 | 0 | 0  | 0 | 0  | 0  | 0      | 0      |
| S207-(+)ssRNA-37 | 0 | 1  | 0 | 0  | 1  | 0      | 100.00 |
| S208-(+)ssRNA-38 | 1 | 3  | 1 | 0  | 5  | 20.00  | 80.00  |
| S209-(+)ssRNA-39 | 0 | 1  | 1 | 0  | 2  | 0      | 100.00 |
| S210-(+)ssRNA-40 | 1 | 3  | 0 | 1  | 5  | 40.00  | 60.00  |
| S211-(+)ssRNA-41 | 0 | 1  | 0 | 0  | 1  | 0      | 100.00 |

## Additional file 8 Continued

|                  |    |    |   |    |    |        |        |
|------------------|----|----|---|----|----|--------|--------|
| S212-(+)ssRNA-42 | 0  | 4  | 1 | 0  | 5  | 0      | 100.00 |
| S213-(+)ssRNA-43 | 0  | 0  | 2 | 0  | 2  | 0      | 100.00 |
| S214-(+)ssRNA-44 | 0  | 1  | 3 | 0  | 4  | 0      | 100.00 |
| S215-(+)ssRNA-45 | 0  | 0  | 4 | 0  | 4  | 0      | 100.00 |
| S216-(+)ssRNA-46 | 1  | 0  | 0 | 0  | 1  | 100.00 | 0      |
| S217-(+)ssRNA-47 | 0  | 1  | 1 | 0  | 2  | 0      | 100.00 |
| S218-(+)ssRNA-48 | 0  | 0  | 1 | 0  | 1  | 0      | 100.00 |
| S219-(+)ssRNA-49 | 0  | 0  | 4 | 0  | 4  | 0      | 100.00 |
| S220-(+)ssRNA-50 | 0  | 2  | 2 | 0  | 4  | 0      | 100.00 |
| S221-(+)ssRNA-51 | 0  | 1  | 0 | 0  | 1  | 0      | 100.00 |
| S222-(+)ssRNA-52 | 4  | 1  | 1 | 4  | 10 | 80.00  | 20.00  |
| S223-(+)ssRNA-53 | 4  | 1  | 2 | 32 | 39 | 92.31  | 7.69   |
| S224-(+)ssRNA-54 | 1  | 2  | 0 | 1  | 4  | 50.00  | 50.00  |
| S225-(+)ssRNA-55 | 6  | 0  | 0 | 4  | 10 | 100.00 | 0      |
| S226-(+)ssRNA-56 | 14 | 0  | 3 | 2  | 19 | 84.21  | 15.79  |
| S227-(+)ssRNA-57 | 0  | 8  | 8 | 4  | 20 | 20.00  | 80.00  |
| S228-(+)ssRNA-58 | 5  | 1  | 0 | 2  | 8  | 87.50  | 12.50  |
| S229-(+)ssRNA-59 | 0  | 13 | 2 | 0  | 15 | 0      | 100.00 |
| S230-(+)ssRNA-60 | 4  | 1  | 1 | 2  | 8  | 75.00  | 25.00  |
| S231-(+)ssRNA-61 | 3  | 0  | 3 | 3  | 9  | 66.67  | 33.33  |
| S232-(+)ssRNA-62 | 4  | 0  | 0 | 2  | 6  | 100.00 | 0      |
| S233-(+)ssRNA-63 | 5  | 2  | 0 | 3  | 10 | 80.00  | 20.00  |
| S234-(+)ssRNA-64 | 10 | 3  | 0 | 9  | 22 | 86.36  | 13.64  |
| S235-(+)ssRNA-65 | 7  | 1  | 0 | 3  | 11 | 90.91  | 9.09   |
| S236-(+)ssRNA-66 | 1  | 0  | 0 | 3  | 4  | 100.00 | 0      |
| S237-(+)ssRNA-67 | 2  | 0  | 0 | 4  | 6  | 100.00 | 0      |
| S238-(+)ssRNA-68 | 3  | 0  | 1 | 0  | 4  | 75.00  | 25.00  |
| S239-(+)ssRNA-69 | 2  | 0  | 0 | 1  | 3  | 100.00 | 0      |
| S240-(+)ssRNA-70 | 0  | 3  | 0 | 1  | 4  | 25.00  | 75.00  |
| S241-(+)ssRNA-71 | 5  | 1  | 0 | 4  | 10 | 90.00  | 10.00  |
| S242-(+)ssRNA-72 | 0  | 2  | 1 | 0  | 3  | 0      | 100.00 |
| S243-(+)ssRNA-73 | 1  | 1  | 0 | 1  | 3  | 66.67  | 33.33  |
| S244-(+)ssRNA-74 | 0  | 33 | 0 | 0  | 33 | 0      | 100.00 |
| S245-(+)ssRNA-75 | 0  | 8  | 0 | 0  | 8  | 0      | 100.00 |
| S246-(+)ssRNA-76 | 0  | 4  | 0 | 0  | 4  | 0      | 100.00 |
| S247-(+)ssRNA-77 | 4  | 0  | 1 | 7  | 12 | 91.67  | 8.33   |
| S248-(+)ssRNA-78 | 5  | 1  | 0 | 5  | 11 | 90.91  | 9.09   |
| S249-(+)ssRNA-79 | 3  | 1  | 4 | 8  | 16 | 68.75  | 31.25  |
| S250-(+)ssRNA-80 | 1  | 0  | 0 | 0  | 1  | 100.00 | 0      |
| S251-(+)ssRNA-81 | 0  | 1  | 0 | 0  | 1  | 0      | 100.00 |
| S252-(+)ssRNA-82 | 0  | 1  | 1 | 0  | 2  | 0      | 100.00 |
| S253-(+)ssRNA-83 | 4  | 0  | 0 | 1  | 5  | 100.00 | 0      |
| S254-(+)ssRNA-84 | 8  | 0  | 0 | 3  | 11 | 100.00 | 0      |

Additional file 8 Continued

|                  |   |   |   |   |   |       |        |
|------------------|---|---|---|---|---|-------|--------|
| S255-(+)ssRNA-85 | 0 | 0 | 1 | 0 | 1 | 0     | 100.00 |
| S256-(+)ssRNA-86 | 6 | 0 | 1 | 2 | 9 | 88.89 | 11.11  |
| S257-(+)ssRNA-87 | 0 | 1 | 1 | 0 | 2 | 0     | 100.00 |
