# Supplementary material for: Coevolution between simple sequence repeats (SSRs) and virus genome size
Source: PubMed Central journal article supplement (PMC3585866; doi:10.1186/1471-2164-13-435), 2012-08-30
Supplement: 1471-2164-13-435-S12.pdf [file 1471-2164-13-435-S12.pdf]

## Additional file 9 Occurrence of di- SSRs in analyzed virus genomes

| No. Type     | Repeated motifs |       |       |       |       |       | Total |
|--------------|-----------------|-------|-------|-------|-------|-------|-------|
|              | AC/CA           | AG/GA | AT/TA | CG/GC | CT/TC | GT/TG |       |
| S1-dsDNA-1   | 29              | 17    | 119   | 1     | 22    | 23    | 211   |
| S2-dsDNA-2   | 21              | 10    | 24    | 43    | 12    | 19    | 129   |
| S3-dsDNA-3   | 6               | 3     | 14    | 22    | 6     | 10    | 61    |
| S4-dsDNA-4   | 3               | 4     | 4     | 10    | 8     | 7     | 36    |
| S5-dsDNA-5   | 27              | 70    | 85    | 0     | 31    | 42    | 255   |
| S6-dsDNA-6   | 16              | 13    | 12    | 6     | 14    | 11    | 72    |
| S7-dsDNA-7   | 1               | 11    | 20    | 20    | 4     | 7     | 63    |
| S8-dsDNA-8   | 11              | 31    | 103   | 8     | 27    | 23    | 203   |
| S9-dsDNA-9   | 8               | 7     | 13    | 0     | 8     | 1     | 37    |
| S10-dsDNA-10 | 7               | 9     | 0     | 7     | 11    | 12    | 46    |
| S11-dsDNA-11 | 11              | 11    | 6     | 24    | 1     | 6     | 59    |
| S12-dsDNA-12 | 6               | 6     | 0     | 78    | 7     | 5     | 102   |
| S13-dsDNA-13 | 14              | 18    | 3     | 3     | 15    | 9     | 62    |
| S14-dsDNA-14 | 3               | 4     | 14    | 0     | 4     | 10    | 35    |
| S15-dsDNA-15 | 10              | 12    | 11    | 1     | 10    | 9     | 53    |
| S16-dsDNA-16 | 7               | 14    | 15    | 0     | 13    | 12    | 61    |
| S17-dsDNA-17 | 0               | 0     | 4     | 0     | 0     | 0     | 4     |
| S18-dsDNA-18 | 5               | 5     | 6     | 12    | 0     | 3     | 31    |
| S19-dsDNA-19 | 1               | 1     | 15    | 0     | 0     | 1     | 18    |
| S20-dsDNA-20 | 4               | 13    | 61    | 0     | 22    | 8     | 108   |
| S21-dsDNA-21 | 5               | 18    | 28    | 0     | 7     | 6     | 64    |
| S22-dsDNA-22 | 4               | 15    | 96    | 0     | 10    | 3     | 128   |
| S23-dsDNA-23 | 7               | 6     | 16    | 0     | 7     | 0     | 36    |
| S24-dsDNA-24 | 6               | 3     | 10    | 2     | 3     | 5     | 29    |
| S25-dsDNA-25 | 45              | 89    | 391   | 5     | 112   | 34    | 676   |
| S26-dsDNA-26 | 40              | 62    | 13    | 648   | 62    | 33    | 858   |
| S27-dsDNA-27 | 34              | 45    | 812   | 11    | 44    | 42    | 988   |
| S28-dsDNA-28 | 25              | 12    | 420   | 0     | 10    | 25    | 492   |
| S29-dsDNA-29 | 55              | 53    | 148   | 28    | 47    | 53    | 384   |
| S30-dsDNA-30 | 24              | 27    | 668   | 0     | 10    | 23    | 752   |
| S31-dsDNA-31 | 108             | 55    | 6     | 1036  | 30    | 114   | 1349  |
| S32-dsDNA-32 | 27              | 29    | 228   | 2     | 26    | 25    | 337   |
| S33-dsDNA-33 | 40              | 11    | 1764  | 0     | 6     | 34    | 1855  |
| S34-dsDNA-34 | 34              | 28    | 165   | 19    | 25    | 36    | 307   |
| S35-dsDNA-35 | 43              | 23    | 284   | 2     | 33    | 32    | 417   |
| S36-dsDNA-36 | 42              | 28    | 24    | 48    | 33    | 45    | 220   |
| S37-dsDNA-37 | 20              | 94    | 34    | 6     | 78    | 27    | 259   |
| S38-dsDNA-38 | 20              | 2     | 155   | 3     | 10    | 15    | 205   |
| S39-dsDNA-39 | 151             | 16    | 39    | 60    | 18    | 119   | 403   |

## Additional file 9 Continued

|              |     |     |     |     |     |     |     |
|--------------|-----|-----|-----|-----|-----|-----|-----|
| S40-dsDNA-40 | 109 | 76  | 357 | 31  | 78  | 95  | 746 |
| S41-dsDNA-41 | 193 | 183 | 64  | 145 | 168 | 246 | 999 |
| S42-dsDNA-42 | 142 | 60  | 535 | 105 | 39  | 117 | 998 |
| S43-dsDNA-43 | 53  | 19  | 93  | 51  | 21  | 72  | 309 |
| S44-dsDNA-44 | 152 | 30  | 45  | 39  | 33  | 137 | 436 |
| S45-dsDNA-45 | 117 | 152 | 136 | 9   | 125 | 102 | 641 |
| S46-dsDNA-46 | 69  | 64  | 40  | 105 | 79  | 52  | 409 |
| S47-dsDNA-47 | 57  | 23  | 24  | 300 | 16  | 48  | 468 |
| S48-dsDNA-48 | 67  | 22  | 106 | 39  | 31  | 50  | 315 |
| S49-dsDNA-49 | 58  | 53  | 196 | 30  | 52  | 53  | 442 |
| S50-dsDNA-50 | 43  | 64  | 50  | 106 | 65  | 38  | 366 |
| S51-dsDNA-51 | 114 | 62  | 70  | 291 | 53  | 95  | 685 |
| S52-dsDNA-52 | 94  | 101 | 56  | 236 | 112 | 81  | 680 |
| S53-dsDNA-53 | 83  | 67  | 102 | 37  | 64  | 77  | 430 |
| S54-dsDNA-54 | 60  | 73  | 14  | 44  | 75  | 68  | 334 |
| S55-dsDNA-55 | 58  | 24  | 134 | 2   | 38  | 53  | 309 |
| S56-dsDNA-56 | 11  | 6   | 5   | 53  | 9   | 11  | 95  |
| S57-dsDNA-57 | 13  | 16  | 14  | 36  | 20  | 9   | 108 |
| S58-dsDNA-58 | 8   | 5   | 25  | 0   | 4   | 3   | 45  |
| S59-dsDNA-59 | 3   | 16  | 10  | 3   | 9   | 4   | 45  |
| S60-dsDNA-60 | 2   | 0   | 0   | 0   | 2   | 2   | 6   |
| S61-dsDNA-61 | 4   | 0   | 12  | 0   | 0   | 16  | 32  |
| S62-dsDNA-62 | 5   | 3   | 8   | 0   | 1   | 1   | 18  |
| S63-dsDNA-63 | 0   | 2   | 9   | 0   | 1   | 3   | 15  |
| S64-dsDNA-64 | 2   | 4   | 2   | 1   | 4   | 2   | 15  |
| S65-dsDNA-65 | 4   | 3   | 2   | 1   | 2   | 3   | 15  |
| S66-dsDNA-66 | 0   | 1   | 3   | 2   | 2   | 6   | 14  |
| S67-dsDNA-67 | 0   | 3   | 3   | 0   | 1   | 1   | 8   |
| S68-dsDNA-68 | 0   | 4   | 5   | 1   | 3   | 3   | 16  |
| S69-dsDNA-69 | 3   | 1   | 8   | 1   | 1   | 1   | 15  |
| S70-dsDNA-70 | 4   | 1   | 1   | 0   | 1   | 3   | 10  |
| S71-dsDNA-71 | 6   | 3   | 4   | 1   | 4   | 5   | 23  |
| S72-dsDNA-72 | 1   | 4   | 9   | 0   | 0   | 4   | 18  |
| S73-dsDNA-73 | 3   | 4   | 5   | 0   | 0   | 2   | 14  |
| S74-dsDNA-74 | 5   | 5   | 2   | 0   | 0   | 2   | 14  |
| S75-dsDNA-75 | 3   | 4   | 9   | 1   | 1   | 7   | 25  |
| S76-dsDNA-76 | 87  | 63  | 170 | 27  | 68  | 80  | 495 |
| S77-dsDNA-77 | 117 | 36  | 32  | 35  | 22  | 112 | 354 |
| S78-ssDNA-1  | 0   | 0   | 4   | 0   | 3   | 0   | 7   |
| S79-ssDNA-2  | 4   | 1   | 8   | 0   | 3   | 0   | 16  |
| S80-ssDNA-3  | 0   | 1   | 0   | 1   | 0   | 2   | 4   |
| S81-ssDNA-4  | 0   | 1   | 4   | 0   | 0   | 3   | 8   |
| S82-ssDNA-5  | 5   | 0   | 1   | 0   | 1   | 0   | 7   |

Additional file 9 Continued

|                 |    |    |    |    |    |    |    |
|-----------------|----|----|----|----|----|----|----|
| S83-ssDNA-6     | 0  | 1  | 3  | 0  | 0  | 0  | 4  |
| S84-ssDNA-7     | 0  | 2  | 0  | 1  | 1  | 1  | 5  |
| S85-ssDNA-8     | 0  | 1  | 2  | 0  | 3  | 0  | 6  |
| S86-ssDNA-9     | 0  | 1  | 7  | 0  | 1  | 2  | 11 |
| S87-ssDNA-10    | 1  | 0  | 2  | 1  | 2  | 1  | 7  |
| S88-ssDNA-11    | 0  | 0  | 0  | 0  | 1  | 1  | 2  |
| S89-ssDNA-12    | 0  | 1  | 3  | 0  | 2  | 1  | 7  |
| S90-ssDNA-13    | 5  | 0  | 1  | 6  | 0  | 1  | 13 |
| S91-ssDNA-14    | 0  | 10 | 8  | 0  | 6  | 4  | 28 |
| S92-ssDNA-15    | 3  | 3  | 8  | 0  | 3  | 2  | 19 |
| S93-ssDNA-16    | 4  | 1  | 3  | 3  | 0  | 1  | 12 |
| S94-ssDNA-17    | 2  | 0  | 3  | 2  | 1  | 6  | 14 |
| S95-ssDNA-18    | 3  | 5  | 0  | 4  | 4  | 0  | 16 |
| S96-ssDNA-19    | 4  | 3  | 8  | 0  | 1  | 1  | 17 |
| S97-ssDNA-20    | 8  | 9  | 2  | 5  | 2  | 2  | 28 |
| S98-ssDNA-21    | 2  | 0  | 6  | 0  | 3  | 0  | 11 |
| S99-ssDNA-22    | 3  | 4  | 8  | 2  | 1  | 0  | 18 |
| S100-ssDNA-23   | 2  | 1  | 8  | 0  | 0  | 0  | 11 |
| S101-ssDNA-24   | 1  | 0  | 7  | 1  | 0  | 0  | 9  |
| S102-dsDNA-RT-1 | 0  | 1  | 1  | 0  | 5  | 0  | 7  |
| S103-dsDNA-RT-2 | 0  | 0  | 2  | 0  | 3  | 0  | 5  |
| S104-dsDNA-RT-3 | 0  | 2  | 5  | 0  | 6  | 2  | 15 |
| S105-dsDNA-RT-4 | 3  | 2  | 7  | 0  | 0  | 0  | 12 |
| S106-dsDNA-RT-5 | 1  | 2  | 23 | 0  | 0  | 1  | 27 |
| S107-dsDNA-RT-6 | 1  | 7  | 12 | 0  | 0  | 1  | 21 |
| S108-dsDNA-RT-7 | 2  | 1  | 2  | 0  | 4  | 1  | 10 |
| S109-dsDNA-RT-8 | 1  | 1  | 2  | 0  | 5  | 1  | 10 |
| S110-ssRNA-RT-1 | 1  | 6  | 3  | 0  | 4  | 2  | 16 |
| S111-ssRNA-RT-2 | 0  | 6  | 1  | 2  | 6  | 1  | 16 |
| S112-ssRNA-RT-3 | 4  | 6  | 1  | 3  | 6  | 3  | 23 |
| S113-ssRNA-RT-4 | 1  | 3  | 4  | 1  | 16 | 1  | 26 |
| S114-ssRNA-RT-5 | 7  | 10 | 4  | 1  | 5  | 5  | 32 |
| S115-ssRNA-RT-6 | 4  | 4  | 9  | 1  | 4  | 0  | 22 |
| S116-ssRNA-RT-7 | 3  | 7  | 12 | 0  | 3  | 5  | 30 |
| S117-dsRNA-1    | 2  | 3  | 4  | 6  | 10 | 4  | 29 |
| S118-dsRNA-2    | 6  | 11 | 11 | 10 | 4  | 5  | 47 |
| S119-dsRNA-3    | 6  | 11 | 13 | 7  | 4  | 4  | 45 |
| S120-dsRNA-4    | 2  | 16 | 15 | 0  | 3  | 3  | 39 |
| S121-dsRNA-5    | 9  | 22 | 6  | 3  | 11 | 12 | 63 |
| S122-dsRNA-6    | 4  | 2  | 2  | 13 | 13 | 9  | 43 |
| S123-dsRNA-7    | 13 | 8  | 26 | 5  | 2  | 10 | 64 |
| S124-dsRNA-8    | 4  | 10 | 26 | 0  | 4  | 8  | 52 |
| S125-dsRNA-9    | 5  | 6  | 26 | 1  | 2  | 7  | 47 |

## Additional file 9 Continued

|                  |    |    |    |   |    |   |    |
|------------------|----|----|----|---|----|---|----|
| S126-dsRNA-10    | 6  | 26 | 12 | 5 | 3  | 9 | 61 |
| S127-dsRNA-11    | 4  | 6  | 11 | 1 | 1  | 7 | 30 |
| S128-dsRNA-12    | 5  | 5  | 14 | 3 | 13 | 6 | 46 |
| S129-dsRNA-13    | 4  | 6  | 0  | 1 | 1  | 1 | 13 |
| S130-dsRNA-14    | 6  | 2  | 0  | 0 | 2  | 0 | 10 |
| S131-dsRNA-15    | 1  | 4  | 4  | 0 | 1  | 0 | 10 |
| S132-dsRNA-16    | 4  | 0  | 1  | 0 | 0  | 4 | 9  |
| S133-dsRNA-17    | 2  | 3  | 3  | 0 | 2  | 2 | 12 |
| S134-dsRNA-18    | 5  | 2  | 1  | 0 | 1  | 5 | 14 |
| S135-dsRNA-19    | 2  | 2  | 3  | 0 | 4  | 1 | 12 |
| S136-dsRNA-20    | 3  | 0  | 1  | 1 | 3  | 0 | 8  |
| S137-dsRNA-21    | 4  | 11 | 2  | 2 | 0  | 4 | 23 |
| S138-dsRNA-22    | 3  | 2  | 1  | 5 | 5  | 2 | 18 |
| S139-dsRNA-23    | 19 | 9  | 2  | 3 | 0  | 8 | 41 |
| S140-(-)ssRNA-1  | 5  | 3  | 6  | 0 | 2  | 1 | 17 |
| S141-(-)ssRNA-2  | 4  | 7  | 7  | 0 | 5  | 2 | 25 |
| S142-(-)ssRNA-3  | 2  | 16 | 3  | 0 | 7  | 6 | 34 |
| S143-(-)ssRNA-4  | 1  | 17 | 15 | 0 | 1  | 3 | 37 |
| S144-(-)ssRNA-5  | 4  | 16 | 5  | 0 | 7  | 6 | 38 |
| S145-(-)ssRNA-6  | 1  | 7  | 8  | 0 | 8  | 4 | 28 |
| S146-(-)ssRNA-7  | 3  | 9  | 2  | 0 | 6  | 2 | 22 |
| S147-(-)ssRNA-8  | 9  | 7  | 11 | 0 | 3  | 7 | 37 |
| S148-(-)ssRNA-9  | 8  | 10 | 11 | 0 | 5  | 4 | 38 |
| S149-(-)ssRNA-10 | 4  | 15 | 8  | 0 | 8  | 3 | 38 |
| S150-(-)ssRNA-11 | 6  | 5  | 5  | 0 | 5  | 6 | 27 |
| S151-(-)ssRNA-12 | 6  | 6  | 10 | 0 | 9  | 8 | 39 |
| S152-(-)ssRNA-13 | 5  | 18 | 12 | 1 | 7  | 1 | 44 |
| S153-(-)ssRNA-14 | 2  | 9  | 11 | 0 | 11 | 4 | 37 |
| S154-(-)ssRNA-15 | 15 | 6  | 14 | 0 | 3  | 0 | 38 |
| S155-(-)ssRNA-16 | 8  | 17 | 8  | 0 | 3  | 8 | 44 |
| S156-(-)ssRNA-17 | 1  | 27 | 7  | 0 | 13 | 1 | 49 |
| S157-(-)ssRNA-18 | 3  | 1  | 15 | 0 | 9  | 4 | 32 |
| S158-(-)ssRNA-19 | 9  | 15 | 4  | 0 | 6  | 5 | 39 |
| S159-(-)ssRNA-20 | 4  | 10 | 10 | 0 | 6  | 0 | 30 |
| S160-(-)ssRNA-21 | 8  | 16 | 3  | 0 | 6  | 4 | 37 |
| S161-(-)ssRNA-22 | 4  | 12 | 3  | 0 | 1  | 2 | 22 |
| S162-(-)ssRNA-23 | 4  | 14 | 4  | 0 | 4  | 8 | 34 |
| S163-(-)ssRNA-24 | 1  | 10 | 19 | 0 | 3  | 4 | 37 |
| S164-(-)ssRNA-25 | 7  | 11 | 9  | 1 | 2  | 4 | 34 |
| S165-(-)ssRNA-26 | 8  | 15 | 7  | 0 | 5  | 3 | 38 |
| S166-(-)ssRNA-27 | 2  | 15 | 5  | 0 | 9  | 5 | 36 |
| S167-(-)ssRNA-28 | 7  | 15 | 9  | 0 | 4  | 2 | 37 |
| S168-(-)ssRNA-29 | 10 | 11 | 20 | 0 | 14 | 7 | 62 |

## Additional file 9 Continued

|                  |    |    |    |   |    |    |    |
|------------------|----|----|----|---|----|----|----|
| S169-(-)ssRNA-30 | 3  | 4  | 4  | 0 | 4  | 3  | 18 |
| S170-(-)ssRNA-31 | 0  | 3  | 0  | 0 | 2  | 0  | 5  |
| S171-(+)ssRNA-1  | 0  | 2  | 0  | 1 | 3  | 0  | 6  |
| S172-(+)ssRNA-2  | 0  | 1  | 0  | 1 | 2  | 0  | 4  |
| S173-(+)ssRNA-3  | 0  | 0  | 0  | 1 | 2  | 0  | 3  |
| S174-(+)ssRNA-4  | 0  | 2  | 3  | 0 | 2  | 0  | 7  |
| S175-(+)ssRNA-5  | 5  | 4  | 0  | 1 | 4  | 1  | 15 |
| S176-(+)ssRNA-6  | 9  | 3  | 8  | 0 | 0  | 3  | 23 |
| S177-(+)ssRNA-7  | 0  | 3  | 0  | 0 | 3  | 3  | 9  |
| S178-(+)ssRNA-8  | 2  | 8  | 1  | 1 | 3  | 3  | 18 |
| S179-(+)ssRNA-9  | 9  | 5  | 1  | 4 | 0  | 4  | 23 |
| S180-(+)ssRNA-10 | 3  | 5  | 2  | 0 | 0  | 2  | 12 |
| S181-(+)ssRNA-11 | 5  | 2  | 0  | 2 | 4  | 3  | 16 |
| S182-(+)ssRNA-12 | 1  | 0  | 0  | 4 | 15 | 3  | 23 |
| S183-(+)ssRNA-13 | 3  | 3  | 0  | 0 | 5  | 5  | 16 |
| S184-(+)ssRNA-14 | 1  | 5  | 11 | 2 | 1  | 5  | 25 |
| S185-(+)ssRNA-15 | 7  | 10 | 5  | 0 | 3  | 1  | 26 |
| S186-(+)ssRNA-16 | 4  | 1  | 1  | 6 | 1  | 3  | 16 |
| S187-(+)ssRNA-17 | 5  | 8  | 1  | 0 | 9  | 5  | 28 |
| S188-(+)ssRNA-18 | 4  | 7  | 7  | 2 | 2  | 10 | 32 |
| S189-(+)ssRNA-19 | 1  | 3  | 10 | 5 | 11 | 9  | 39 |
| S190-(+)ssRNA-20 | 2  | 7  | 5  | 1 | 11 | 3  | 29 |
| S191-(+)ssRNA-21 | 6  | 2  | 2  | 0 | 6  | 2  | 18 |
| S192-(+)ssRNA-22 | 1  | 9  | 4  | 0 | 6  | 3  | 23 |
| S193-(+)ssRNA-23 | 3  | 4  | 3  | 2 | 11 | 7  | 30 |
| S194-(+)ssRNA-24 | 8  | 10 | 5  | 0 | 3  | 6  | 32 |
| S195-(+)ssRNA-25 | 9  | 4  | 3  | 3 | 0  | 2  | 21 |
| S196-(+)ssRNA-26 | 13 | 4  | 3  | 4 | 5  | 5  | 34 |
| S197-(+)ssRNA-27 | 1  | 3  | 2  | 3 | 0  | 7  | 16 |
| S198-(+)ssRNA-28 | 4  | 3  | 2  | 2 | 0  | 5  | 16 |
| S199-(+)ssRNA-29 | 6  | 2  | 1  | 0 | 3  | 0  | 12 |
| S200-(+)ssRNA-30 | 4  | 3  | 0  | 1 | 0  | 7  | 15 |
| S201-(+)ssRNA-31 | 6  | 3  | 1  | 0 | 3  | 2  | 15 |
| S202-(+)ssRNA-32 | 8  | 2  | 0  | 4 | 0  | 3  | 17 |
| S203-(+)ssRNA-33 | 0  | 1  | 0  | 2 | 6  | 2  | 11 |
| S204-(+)ssRNA-34 | 4  | 3  | 1  | 1 | 1  | 3  | 13 |
| S205-(+)ssRNA-35 | 7  | 3  | 2  | 1 | 2  | 4  | 19 |
| S206-(+)ssRNA-36 | 1  | 0  | 0  | 2 | 0  | 0  | 3  |
| S207-(+)ssRNA-37 | 1  | 0  | 0  | 0 | 2  | 2  | 5  |
| S208-(+)ssRNA-38 | 3  | 3  | 2  | 2 | 0  | 0  | 10 |
| S209-(+)ssRNA-39 | 1  | 2  | 0  | 2 | 1  | 5  | 11 |
| S210-(+)ssRNA-40 | 1  | 5  | 3  | 0 | 2  | 2  | 13 |
| S211-(+)ssRNA-41 | 1  | 3  | 1  | 3 | 1  | 1  | 10 |

|                  |    |    |    |    |    |    |    |
|------------------|----|----|----|----|----|----|----|
| S212-(+)ssRNA-42 | 0  | 3  | 0  | 0  | 2  | 0  | 5  |
| S213-(+)ssRNA-43 | 4  | 4  | 1  | 2  | 1  | 3  | 15 |
| S214-(+)ssRNA-44 | 2  | 2  | 1  | 0  | 3  | 4  | 12 |
| S215-(+)ssRNA-45 | 1  | 1  | 2  | 0  | 1  | 0  | 5  |
| S216-(+)ssRNA-46 | 4  | 0  | 1  | 1  | 2  | 1  | 9  |
| S217-(+)ssRNA-47 | 4  | 4  | 1  | 0  | 2  | 2  | 13 |
| S218-(+)ssRNA-48 | 1  | 2  | 0  | 0  | 1  | 6  | 10 |
| S219-(+)ssRNA-49 | 1  | 2  | 1  | 1  | 2  | 3  | 10 |
| S220-(+)ssRNA-50 | 4  | 1  | 1  | 0  | 2  | 1  | 9  |
| S221-(+)ssRNA-51 | 5  | 4  | 0  | 5  | 4  | 10 | 28 |
| S222-(+)ssRNA-52 | 10 | 10 | 10 | 0  | 6  | 30 | 66 |
| S223-(+)ssRNA-53 | 3  | 9  | 12 | 0  | 1  | 24 | 49 |
| S224-(+)ssRNA-54 | 54 | 2  | 6  | 0  | 29 | 2  | 93 |
| S225-(+)ssRNA-55 | 4  | 13 | 0  | 0  | 3  | 9  | 29 |
| S226-(+)ssRNA-56 | 6  | 12 | 5  | 0  | 3  | 5  | 31 |
| S227-(+)ssRNA-57 | 2  | 2  | 0  | 4  | 4  | 4  | 16 |
| S228-(+)ssRNA-58 | 6  | 4  | 1  | 2  | 0  | 4  | 17 |
| S229-(+)ssRNA-59 | 3  | 0  | 0  | 41 | 1  | 2  | 47 |
| S230-(+)ssRNA-60 | 4  | 8  | 2  | 2  | 1  | 4  | 21 |
| S231-(+)ssRNA-61 | 3  | 15 | 2  | 1  | 1  | 3  | 25 |
| S232-(+)ssRNA-62 | 1  | 7  | 3  | 0  | 2  | 2  | 15 |
| S233-(+)ssRNA-63 | 3  | 6  | 2  | 2  | 3  | 7  | 23 |
| S234-(+)ssRNA-64 | 2  | 12 | 3  | 0  | 2  | 4  | 23 |
| S235-(+)ssRNA-65 | 2  | 12 | 5  | 1  | 2  | 11 | 33 |
| S236-(+)ssRNA-66 | 5  | 4  | 9  | 1  | 1  | 13 | 33 |
| S237-(+)ssRNA-67 | 1  | 7  | 7  | 0  | 1  | 0  | 16 |
| S238-(+)ssRNA-68 | 5  | 6  | 4  | 0  | 1  | 8  | 24 |
| S239-(+)ssRNA-69 | 3  | 4  | 2  | 1  | 9  | 5  | 24 |
| S240-(+)ssRNA-70 | 2  | 3  | 4  | 3  | 4  | 6  | 22 |
| S241-(+)ssRNA-71 | 1  | 6  | 0  | 1  | 5  | 0  | 13 |
| S242-(+)ssRNA-72 | 0  | 1  | 0  | 0  | 4  | 0  | 5  |
| S243-(+)ssRNA-73 | 1  | 6  | 5  | 1  | 4  | 4  | 21 |
| S244-(+)ssRNA-74 | 0  | 0  | 0  | 1  | 9  | 0  | 10 |
| S245-(+)ssRNA-75 | 2  | 0  | 0  | 0  | 8  | 0  | 10 |
| S246-(+)ssRNA-76 | 1  | 0  | 0  | 3  | 8  | 0  | 12 |
| S247-(+)ssRNA-77 | 0  | 5  | 2  | 11 | 9  | 5  | 32 |
| S248-(+)ssRNA-78 | 2  | 8  | 16 | 0  | 3  | 7  | 36 |
| S249-(+)ssRNA-79 | 2  | 7  | 8  | 4  | 4  | 9  | 34 |
| S250-(+)ssRNA-80 | 3  | 5  | 1  | 0  | 2  | 2  | 13 |
| S251-(+)ssRNA-81 | 14 | 3  | 0  | 3  | 8  | 1  | 29 |
| S252-(+)ssRNA-82 | 9  | 2  | 2  | 0  | 4  | 3  | 20 |
| S253-(+)ssRNA-83 | 0  | 7  | 3  | 0  | 3  | 7  | 20 |
| S254-(+)ssRNA-84 | 0  | 7  | 1  | 0  | 1  | 1  | 10 |

Additional file 9 Continued

|                  |   |   |   |   |   |   |    |
|------------------|---|---|---|---|---|---|----|
| S255-(+)ssRNA-85 | 4 | 3 | 2 | 1 | 3 | 1 | 14 |
| S256-(+)ssRNA-86 | 4 | 7 | 1 | 0 | 0 | 7 | 19 |
| S257-(+)ssRNA-87 | 3 | 1 | 0 | 0 | 0 | 0 | 4  |
