# Supplementary material for: Coevolution between simple sequence repeats (SSRs) and virus genome size
Source: PubMed Central journal article supplement (PMC3585866; doi:10.1186/1471-2164-13-435), 2012-08-30
Supplement: 1471-2164-13-435-S13.pdf [file 1471-2164-13-435-S13.pdf]

## Additional file 10 Occurrence of tri- SSRs in analyzed virus genomes

| No. Type     | Repeat motif groups |         |         |         |         |         |         |         |         |         | Total |
|--------------|---------------------|---------|---------|---------|---------|---------|---------|---------|---------|---------|-------|
|              | aat ata             | aac aca | aag aga | acc cac | acg cga | agt act | agc cag | agg cct | atg atc | ggc cgg |       |
|              | att taa             | caa gtt | ctt gaa | cca ggt | cgt gac | cta gta | ctg gca | ctc gag | cat gat | cgc cgg |       |
|              | tat tta             | tgt ttg | tct ttc | gtg tgg | gtc tcg | tac tag | gct tgc | gga tcc | tca tga | gcc gcg |       |
| S1-dsDNA-1   | 27                  | 7       | 13      | 2       |         |         | 3       |         | 15      |         | 67    |
| S2-dsDNA-2   | 2                   | 5       | 3       | 1       | 3       | 1       | 3       | 4       | 8       | 3       | 33    |
| S3-dsDNA-3   | 2                   |         |         | 1       |         |         | 3       |         | 2       | 7       | 15    |
| S4-dsDNA-4   |                     | 1       |         |         | 1       |         | 2       |         | 1       | 3       | 8     |
| S5-dsDNA-5   | 7                   | 4       | 10      |         |         | 2       | 1       | 6       | 7       |         | 37    |
| S6-dsDNA-6   | 3                   | 1       | 3       | 2       | 3       |         | 1       | 1       | 2       | 3       | 19    |
| S7-dsDNA-7   |                     | 2       | 1       |         |         | 1       | 1       |         | 7       | 4       | 16    |
| S8-dsDNA-8   | 19                  | 4       | 7       | 1       |         | 2       | 5       | 1       | 6       | 1       | 46    |
| S9-dsDNA-9   | 6                   | 1       | 3       |         |         | 3       |         |         | 2       |         | 15    |
| S10-dsDNA-10 |                     |         | 4       | 3       | 7       | 1       | 3       | 2       | 2       | 5       | 27    |
| S11-dsDNA-11 |                     | 2       | 1       |         |         |         | 5       | 2       | 5       | 3       | 18    |
| S12-dsDNA-12 |                     |         | 4       | 1       | 9       |         | 4       |         |         | 2       | 20    |
| S13-dsDNA-13 | 1                   |         | 1       | 1       | 3       | 1       | 2       |         | 3       |         | 12    |
| S14-dsDNA-14 | 1                   | 2       | 1       |         |         | 1       |         |         |         | 1       | 6     |
| S15-dsDNA-15 | 1                   | 2       | 6       | 3       | 2       |         | 5       |         | 1       | 1       | 21    |
| S16-dsDNA-16 |                     | 3       | 7       | 3       |         | 4       | 17      |         | 4       |         | 38    |
| S17-dsDNA-17 | 1                   | 4       |         |         |         |         |         |         |         | 3       | 8     |
| S18-dsDNA-18 | 2                   | 4       |         |         |         |         |         |         |         | 2       | 8     |
| S19-dsDNA-19 | 2                   |         |         |         |         |         |         |         | 1       |         | 3     |
| S20-dsDNA-20 | 8                   | 2       | 5       | 1       |         | 1       |         | 1       |         |         | 18    |
| S21-dsDNA-21 |                     | 1       | 5       | 1       |         |         |         |         |         |         | 7     |
| S22-dsDNA-22 | 7                   | 1       | 7       | 1       | 1       | 2       |         |         |         |         | 19    |
| S23-dsDNA-23 | 2                   |         |         |         |         | 1       |         |         |         |         | 3     |
| S24-dsDNA-24 |                     |         |         |         |         |         |         |         |         |         | 0     |
| S25-dsDNA-25 | 36                  | 5       | 15      | 1       | 8       | 10      | 1       | 6       | 25      | 1       | 108   |
| S26-dsDNA-26 | 2                   | 6       | 10      | 15      | 19      | 5       | 32      | 15      | 3       | 66      | 173   |
| S27-dsDNA-27 | 89                  | 9       | 27      | 3       | 2       | 13      | 2       | 3       | 21      |         | 169   |
| S28-dsDNA-28 | 69                  | 6       | 10      | 1       | 1       | 4       |         | 3       | 21      |         | 115   |
| S29-dsDNA-29 | 9                   | 9       | 11      | 2       | 20      | 2       |         | 5       | 1       | 1       | 60    |
| S30-dsDNA-30 | 80                  | 9       | 8       |         |         | 6       |         | 1       | 16      |         | 120   |
| S31-dsDNA-31 |                     | 6       | 18      | 10      | 22      | 4       | 38      | 5       | 6       | 48      | 157   |
| S32-dsDNA-32 | 30                  | 14      | 7       | 1       | 4       | 4       | 1       | 2       | 2       | 1       | 66    |
| S33-dsDNA-33 | 510                 | 4       | 11      |         | 1       | 3       | 1       | 1       | 23      |         | 554   |
| S34-dsDNA-34 | 31                  | 8       | 11      | 2       |         | 2       | 2       | 9       | 12      | 3       | 80    |
| S35-dsDNA-35 | 65                  | 18      | 55      | 1       | 7       | 5       | 2       | 4       | 29      |         | 186   |
| S36-dsDNA-36 | 16                  | 13      | 9       | 16      | 15      | 7       | 12      | 13      | 4       | 17      | 122   |
| S37-dsDNA-37 |                     | 1       | 5       | 7       | 5       | 1       | 21      | 11      | 2       | 11      | 64    |

Additional file 10 Continued

|              |    |    |     |     |    |    |    |    |    |    |     |
|--------------|----|----|-----|-----|----|----|----|----|----|----|-----|
| S38-dsDNA-38 | 36 | 9  | 4   | 3   | 2  |    | 1  |    | 7  |    | 62  |
| S39-dsDNA-39 | 2  | 12 | 1   | 12  | 7  | 2  | 14 | 4  | 8  | 16 | 78  |
| S40-dsDNA-40 | 33 | 19 | 37  | 6   | 7  | 4  | 9  | 2  | 23 | 1  | 141 |
| S41-dsDNA-41 | 11 | 26 | 44  | 27  | 47 | 2  | 40 | 21 | 59 | 29 | 306 |
| S42-dsDNA-42 | 54 | 39 | 29  | 144 | 19 | 6  | 16 | 12 | 28 | 41 | 388 |
| S43-dsDNA-43 | 18 | 18 | 5   | 5   | 20 | 4  | 3  | 3  | 5  | 20 | 101 |
| S44-dsDNA-44 | 7  | 25 | 6   | 38  | 14 | 13 | 6  | 9  | 23 | 7  | 148 |
| S45-dsDNA-45 | 41 | 96 | 157 | 23  | 12 | 31 | 56 | 80 | 53 | 6  | 555 |
| S46-dsDNA-46 | 7  | 4  | 6   | 9   | 3  |    | 4  | 14 | 24 | 7  | 78  |
| S47-dsDNA-47 |    | 3  | 4   | 20  | 31 | 2  | 12 | 15 | 1  | 73 | 161 |
| S48-dsDNA-48 | 9  | 3  | 4   | 3   | 6  |    |    | 6  | 2  | 6  | 39  |
| S49-dsDNA-49 | 15 | 9  | 6   | 1   | 4  | 1  | 2  | 8  | 8  | 2  | 56  |
| S50-dsDNA-50 | 8  | 3  | 9   | 6   | 3  | 3  | 5  | 11 | 4  | 8  | 60  |
| S51-dsDNA-51 | 3  | 13 | 17  | 43  | 45 | 5  | 25 | 26 | 22 | 97 | 296 |
| S52-dsDNA-52 | 6  | 22 | 24  | 24  | 63 | 11 | 41 | 41 | 29 | 94 | 355 |
| S53-dsDNA-53 | 4  | 11 | 7   | 3   | 4  | 3  | 5  | 7  | 7  | 7  | 58  |
| S54-dsDNA-54 | 1  | 4  | 3   | 17  | 1  | 1  | 23 | 41 | 7  | 34 | 132 |
| S55-dsDNA-55 | 11 | 7  | 31  | 1   |    | 2  | 9  | 1  | 5  |    | 67  |
| S56-dsDNA-56 | 2  | 1  | 4   | 4   |    |    | 4  | 6  | 3  | 18 | 42  |
| S57-dsDNA-57 |    | 1  | 4   | 5   | 4  |    | 4  | 10 | 1  | 7  | 36  |
| S58-dsDNA-58 | 2  |    | 5   |     |    | 3  |    | 1  |    |    | 11  |
| S59-dsDNA-59 |    | 3  | 3   | 2   |    |    | 1  |    | 2  |    | 11  |
| S60-dsDNA-60 |    | 1  |     |     |    |    | 1  |    | 2  |    | 4   |
| S61-dsDNA-61 |    | 2  | 1   |     |    |    | 2  | 2  |    |    | 7   |
| S62-dsDNA-62 | 1  |    |     |     |    |    |    | 2  |    |    | 3   |
| S63-dsDNA-63 |    |    | 1   |     |    |    | 1  | 4  |    |    | 6   |
| S64-dsDNA-64 |    |    |     |     |    |    | 1  |    |    |    | 1   |
| S65-dsDNA-65 |    |    |     |     |    | 1  | 1  | 3  | 1  |    | 6   |
| S66-dsDNA-66 |    | 1  | 1   |     |    |    | 1  | 1  |    | 1  | 5   |
| S67-dsDNA-67 |    |    | 1   |     |    |    | 2  | 1  |    |    | 4   |
| S68-dsDNA-68 |    |    |     | 1   |    |    |    |    |    | 2  | 3   |
| S69-dsDNA-69 |    |    |     | 1   |    |    | 1  | 1  |    | 1  | 4   |
| S70-dsDNA-70 |    |    | 1   |     |    |    | 1  | 1  | 1  |    | 4   |
| S71-dsDNA-71 | 1  | 1  | 1   | 1   |    |    |    | 1  |    |    | 5   |
| S72-dsDNA-72 | 1  | 1  | 1   |     |    |    |    | 1  |    |    | 4   |
| S73-dsDNA-73 | 1  | 1  |     |     |    |    | 1  | 1  | 2  | 1  | 7   |
| S74-dsDNA-74 | 2  | 1  |     | 2   |    |    |    | 2  |    |    | 7   |
| S75-dsDNA-75 | 1  | 3  |     | 1   |    |    |    |    | 1  |    | 6   |
| S76-dsDNA-76 | 31 | 12 | 23  | 4   | 4  | 1  | 8  | 10 | 18 | 3  | 114 |
| S77-dsDNA-77 | 5  | 21 | 6   | 30  | 26 | 2  | 3  | 2  | 19 | 7  | 121 |
| S78-ssDNA-1  | 1  |    |     | 1   | 1  | 1  |    |    |    | 1  | 5   |
| S79-ssDNA-2  |    | 4  |     |     |    | 1  |    |    |    |    | 5   |
| S80-ssDNA-3  |    |    |     |     |    |    |    |    |    |    | 0   |

Additional file 10 Continued

|                 |   |   |   |   |   |   |   |   |   |    |    |
|-----------------|---|---|---|---|---|---|---|---|---|----|----|
| S81-ssDNA-4     | 1 |   |   |   |   |   |   |   |   | 1  |    |
| S82-ssDNA-5     |   |   | 1 |   | 1 |   | 1 |   | 1 | 4  |    |
| S83-ssDNA-6     | 1 | 1 | 3 |   |   |   |   |   |   | 5  |    |
| S84-ssDNA-7     |   |   | 1 |   |   |   |   | 1 |   | 2  |    |
| S85-ssDNA-8     | 1 | 1 | 2 |   |   |   | 1 |   |   | 5  |    |
| S86-ssDNA-9     |   | 1 | 1 |   |   |   |   |   |   | 2  |    |
| S87-ssDNA-10    |   | 2 | 1 |   |   |   |   |   |   | 3  |    |
| S88-ssDNA-11    |   | 1 |   |   |   |   |   | 1 |   | 2  |    |
| S89-ssDNA-12    |   |   |   |   |   |   |   |   | 1 | 1  |    |
| S90-ssDNA-13    | 1 | 1 |   | 1 |   | 1 | 1 | 1 |   | 6  |    |
| S91-ssDNA-14    | 4 |   | 5 |   |   |   |   | 1 |   | 10 |    |
| S92-ssDNA-15    | 6 |   | 2 |   |   |   |   |   | 1 | 9  |    |
| S93-ssDNA-16    |   |   |   | 1 |   |   | 1 |   | 1 | 3  |    |
| S94-ssDNA-17    |   |   |   |   |   |   | 1 | 1 |   | 2  |    |
| S95-ssDNA-18    |   | 2 |   | 1 | 1 |   |   | 1 |   | 5  |    |
| S96-ssDNA-19    |   | 1 | 2 | 2 |   | 1 |   |   |   | 6  |    |
| S97-ssDNA-20    | 1 | 2 |   |   |   |   | 1 |   |   | 5  |    |
| S98-ssDNA-21    | 3 |   |   |   | 1 |   | 1 |   | 3 | 8  |    |
| S99-ssDNA-22    | 2 |   | 1 | 4 |   |   |   | 1 |   | 8  |    |
| S100-ssDNA-23   |   | 1 | 2 |   |   |   | 1 |   |   | 4  |    |
| S101-ssDNA-24   | 1 |   | 1 | 4 |   |   |   | 1 |   | 7  |    |
| S102-dsDNA-RT-1 |   |   | 1 |   |   |   |   |   | 1 | 2  |    |
| S103-dsDNA-RT-2 |   |   | 2 | 2 |   |   |   |   |   | 4  |    |
| S104-dsDNA-RT-3 |   |   | 6 |   |   |   | 1 |   |   | 7  |    |
| S105-dsDNA-RT-4 | 1 |   | 2 |   |   |   |   | 1 |   | 4  |    |
| S106-dsDNA-RT-5 | 6 |   | 5 |   |   |   |   |   |   | 11 |    |
| S107-dsDNA-RT-6 | 1 |   | 2 |   |   | 1 |   |   |   | 4  |    |
| S108-dsDNA-RT-7 | 1 | 1 | 4 |   |   |   | 1 |   |   | 7  |    |
| S109-dsDNA-RT-8 | 1 |   | 3 |   |   |   |   |   |   | 4  |    |
| S110-ssRNA-RT-1 | 2 |   |   |   |   |   |   |   | 1 | 3  |    |
| S111-ssRNA-RT-2 | 1 |   |   |   |   |   |   | 1 |   | 2  |    |
| S112-ssRNA-RT-3 |   |   |   | 2 |   |   |   | 1 |   | 3  |    |
| S113-ssRNA-RT-4 | 1 | 1 |   |   |   |   |   |   |   | 2  |    |
| S114-ssRNA-RT-5 | 2 | 1 | 2 |   |   | 2 | 3 | 2 |   | 12 |    |
| S115-ssRNA-RT-6 | 1 | 2 | 1 |   |   |   |   | 3 |   | 7  |    |
| S116-ssRNA-RT-7 | 1 | 1 | 4 | 1 |   | 1 |   | 1 | 1 | 10 |    |
| S117-dsRNA-1    | 1 | 1 |   | 2 |   |   | 1 |   |   | 5  |    |
| S118-dsRNA-2    | 1 |   | 1 | 1 | 1 |   | 1 |   | 3 | 8  |    |
| S119-dsRNA-3    |   |   | 1 |   |   |   | 1 | 4 | 5 | 11 |    |
| S120-dsRNA-4    | 4 |   | 1 |   |   |   | 1 |   | 2 | 8  |    |
| S121-dsRNA-5    | 1 | 4 |   |   | 1 |   | 1 | 3 | 4 | 2  | 16 |
| S122-dsRNA-6    |   | 1 | 1 |   | 1 |   | 1 | 2 | 1 | 2  | 9  |
| S123-dsRNA-7    | 1 | 2 |   |   |   | 1 | 1 |   | 2 |    | 7  |

Additional file 10 Continued

|                  |   |   |   |   |   |   |   |   |   |   |    |
|------------------|---|---|---|---|---|---|---|---|---|---|----|
| S124-dsRNA-8     | 7 | 3 | 4 |   |   | 1 |   | 1 | 2 |   | 18 |
| S125-dsRNA-9     | 2 | 1 | 4 | 1 |   | 1 |   |   | 3 | 1 | 13 |
| S126-dsRNA-10    |   | 2 |   |   | 1 | 1 |   | 2 | 3 |   | 9  |
| S127-dsRNA-11    | 1 | 5 |   | 1 |   | 1 | 1 |   | 1 |   | 10 |
| S128-dsRNA-12    | 1 | 1 | 1 |   | 1 | 1 | 1 |   | 2 |   | 8  |
| S129-dsRNA-13    |   | 1 |   | 1 |   | 1 |   |   |   |   | 3  |
| S130-dsRNA-14    |   |   | 1 |   |   |   | 1 |   |   |   | 2  |
| S131-dsRNA-15    |   |   | 1 |   |   |   |   |   |   |   | 1  |
| S132-dsRNA-16    |   |   |   |   |   |   |   |   | 1 |   | 1  |
| S133-dsRNA-17    |   | 1 |   |   |   |   |   | 1 |   |   | 2  |
| S134-dsRNA-18    |   | 1 | 1 | 1 |   |   |   |   |   |   | 3  |
| S135-dsRNA-19    |   |   |   | 1 |   | 2 |   |   |   |   | 3  |
| S136-dsRNA-20    |   |   |   |   |   |   | 1 |   |   |   | 1  |
| S137-dsRNA-21    |   | 8 | 1 | 3 |   |   |   | 1 | 2 |   | 15 |
| S138-dsRNA-22    |   |   |   | 1 | 1 |   | 1 | 2 |   |   | 5  |
| S139-dsRNA-23    |   | 2 | 2 | 2 |   | 1 | 2 |   |   |   | 9  |
| S140-(-)ssRNA-1  |   |   |   | 1 |   |   |   | 1 |   |   | 2  |
| S141-(-)ssRNA-2  | 1 | 1 |   |   |   |   |   |   | 1 |   | 3  |
| S142-(-)ssRNA-3  |   |   |   |   |   |   |   | 1 |   | 1 | 2  |
| S143-(-)ssRNA-4  | 1 |   | 1 |   |   |   |   | 1 | 5 |   | 8  |
| S144-(-)ssRNA-5  | 1 |   | 3 | 1 |   |   | 1 |   | 2 |   | 8  |
| S145-(-)ssRNA-6  | 1 |   | 1 |   |   |   | 2 | 2 | 3 |   | 9  |
| S146-(-)ssRNA-7  |   | 2 | 2 |   | 1 |   | 1 | 5 |   |   | 11 |
| S147-(-)ssRNA-8  |   |   |   |   |   |   |   | 1 | 2 |   | 3  |
| S148-(-)ssRNA-9  | 1 | 1 |   | 1 | 1 |   |   |   | 2 |   | 6  |
| S149-(-)ssRNA-10 |   |   | 1 |   |   |   |   | 2 | 1 |   | 4  |
| S150-(-)ssRNA-11 |   |   |   |   | 1 |   |   | 1 | 2 |   | 4  |
| S151-(-)ssRNA-12 | 1 |   |   |   |   |   |   |   |   |   | 1  |
| S152-(-)ssRNA-13 |   | 1 |   |   |   | 2 |   | 2 | 4 |   | 9  |
| S153-(-)ssRNA-14 | 1 | 2 | 1 |   |   |   |   |   |   |   | 4  |
| S154-(-)ssRNA-15 | 1 |   | 2 | 1 |   |   |   |   | 1 |   | 5  |
| S155-(-)ssRNA-16 | 1 | 3 | 1 | 1 | 1 |   | 2 | 1 |   |   | 10 |
| S156-(-)ssRNA-17 |   |   | 3 |   |   |   |   | 2 | 3 |   | 8  |
| S157-(-)ssRNA-18 | 2 |   | 3 |   |   |   |   | 1 | 3 |   | 9  |
| S158-(-)ssRNA-19 | 1 | 1 | 2 |   |   |   |   |   | 2 |   | 6  |
| S159-(-)ssRNA-20 |   |   | 1 |   |   |   | 1 | 2 | 2 |   | 6  |
| S160-(-)ssRNA-21 |   |   | 1 | 3 |   |   |   |   |   |   | 4  |
| S161-(-)ssRNA-22 | 1 | 3 | 2 |   |   |   |   | 1 | 2 |   | 9  |
| S162-(-)ssRNA-23 | 1 | 1 | 5 | 1 |   |   | 2 |   |   |   | 10 |
| S163-(-)ssRNA-24 | 1 | 2 | 3 |   |   |   |   |   | 5 |   | 11 |
| S164-(-)ssRNA-25 | 1 | 1 | 1 | 1 |   | 5 | 2 |   | 4 |   | 15 |
| S165-(-)ssRNA-26 |   |   | 2 | 2 |   | 1 | 1 | 1 | 2 |   | 9  |
| S166-(-)ssRNA-27 |   | 1 | 2 |   |   |   | 2 | 4 | 4 |   | 13 |

Additional file 10 Continued

|                  |   |   |   |   |   |   |   |   |   |   |   |
|------------------|---|---|---|---|---|---|---|---|---|---|---|
| S167-(-)ssRNA-28 |   | 1 | 4 |   |   |   |   | 1 | 2 |   | 8 |
| S168-(-)ssRNA-29 | 2 | 1 | 3 |   |   |   |   |   |   |   | 6 |
| S169-(-)ssRNA-30 |   |   | 1 |   |   |   |   |   |   |   | 1 |
| S170-(-)ssRNA-31 |   |   |   |   |   |   |   | 1 |   |   | 1 |
| S171-(+)ssRNA-1  |   |   |   |   |   |   |   |   |   |   | 0 |
| S172-(+)ssRNA-2  |   |   | 1 |   |   |   |   |   |   | 1 | 2 |
| S173-(+)ssRNA-3  |   |   |   |   | 1 |   |   |   |   |   | 1 |
| S174-(+)ssRNA-4  |   |   |   |   |   |   |   |   |   |   | 0 |
| S175-(+)ssRNA-5  |   |   | 2 | 1 |   |   |   |   |   |   | 3 |
| S176-(+)ssRNA-6  |   |   |   | 1 |   |   |   |   |   |   | 1 |
| S177-(+)ssRNA-7  | 2 |   |   |   |   |   |   | 1 | 1 |   | 4 |
| S178-(+)ssRNA-8  |   | 1 | 1 |   |   |   |   | 1 |   | 1 | 4 |
| S179-(+)ssRNA-9  |   |   | 1 | 1 |   |   |   |   | 1 |   | 3 |
| S180-(+)ssRNA-10 |   |   |   |   |   |   |   |   |   |   | 0 |
| S181-(+)ssRNA-11 |   |   |   |   |   |   |   |   | 1 |   | 1 |
| S182-(+)ssRNA-12 |   |   |   |   | 1 |   | 1 |   |   |   | 2 |
| S183-(+)ssRNA-13 |   |   | 1 |   |   |   | 1 |   |   |   | 2 |
| S184-(+)ssRNA-14 |   |   |   |   |   |   | 2 |   | 1 |   | 3 |
| S185-(+)ssRNA-15 | 2 | 3 | 1 |   |   |   |   |   |   |   | 6 |
| S186-(+)ssRNA-16 |   |   | 1 |   |   |   | 1 |   | 1 | 1 | 4 |
| S187-(+)ssRNA-17 | 1 |   |   | 1 |   |   |   | 1 |   |   | 3 |
| S188-(+)ssRNA-18 |   |   | 1 |   |   |   |   |   |   |   | 1 |
| S189-(+)ssRNA-19 |   |   | 1 | 1 |   |   | 2 | 2 | 1 |   | 7 |
| S190-(+)ssRNA-20 |   | 2 |   | 2 |   |   |   | 1 |   |   | 5 |
| S191-(+)ssRNA-21 |   | 2 | 1 |   |   |   |   |   |   |   | 3 |
| S192-(+)ssRNA-22 |   |   |   |   |   |   |   | 1 |   |   | 1 |
| S193-(+)ssRNA-23 |   |   | 2 |   |   |   |   |   | 1 |   | 3 |
| S194-(+)ssRNA-24 |   | 1 |   |   |   | 1 |   |   |   |   | 2 |
| S195-(+)ssRNA-25 |   |   | 1 | 1 |   |   | 1 |   |   |   | 3 |
| S196-(+)ssRNA-26 |   | 2 | 1 |   |   |   |   |   | 5 |   | 8 |
| S197-(+)ssRNA-27 |   | 1 | 1 | 2 |   |   |   |   | 1 |   | 5 |
| S198-(+)ssRNA-28 |   | 1 | 1 |   |   |   |   |   |   |   | 2 |
| S199-(+)ssRNA-29 |   |   |   |   |   |   |   |   | 1 |   | 1 |
| S200-(+)ssRNA-30 |   |   |   |   |   |   |   |   | 1 |   | 1 |
| S201-(+)ssRNA-31 |   |   | 1 |   |   |   |   | 1 | 3 |   | 5 |
| S202-(+)ssRNA-32 |   |   | 1 | 1 |   |   |   |   |   |   | 2 |
| S203-(+)ssRNA-33 |   |   |   | 2 |   |   | 1 | 1 |   | 2 | 6 |
| S204-(+)ssRNA-34 |   | 1 |   |   |   |   | 1 |   | 1 |   | 3 |
| S205-(+)ssRNA-35 |   | 1 |   | 1 |   |   |   |   | 2 |   | 4 |
| S206-(+)ssRNA-36 |   | 1 |   |   |   |   |   |   |   |   | 1 |
| S207-(+)ssRNA-37 | 1 |   |   |   |   |   |   | 1 |   |   | 2 |
| S208-(+)ssRNA-38 |   | 2 |   | 1 |   | 1 |   | 1 |   |   | 5 |
| S209-(+)ssRNA-39 |   |   |   | 1 |   |   |   |   | 1 |   | 2 |

Additional file 10 Continued

|                  |   |   |   |   |   |   |   |   |   |   |    |
|------------------|---|---|---|---|---|---|---|---|---|---|----|
| S210-(+)ssRNA-40 |   | 1 | 1 |   |   |   |   | 1 |   | 3 |    |
| S211-(+)ssRNA-41 |   |   |   |   |   | 1 | 1 |   | 1 | 3 |    |
| S212-(+)ssRNA-42 |   |   | 1 |   | 1 |   |   |   |   | 2 |    |
| S213-(+)ssRNA-43 |   | 1 |   |   |   |   |   |   |   | 1 |    |
| S214-(+)ssRNA-44 |   |   |   |   |   |   |   |   |   | 0 |    |
| S215-(+)ssRNA-45 |   | 1 | 1 | 1 |   | 1 |   |   |   | 4 |    |
| S216-(+)ssRNA-46 |   |   |   |   |   |   |   |   |   | 0 |    |
| S217-(+)ssRNA-47 |   |   |   |   |   |   |   |   | 1 | 1 |    |
| S218-(+)ssRNA-48 |   |   |   |   |   |   |   |   |   | 0 |    |
| S219-(+)ssRNA-49 | 1 |   | 1 |   |   |   |   | 1 |   | 3 |    |
| S220-(+)ssRNA-50 |   | 1 |   | 1 |   | 1 |   |   |   | 3 |    |
| S221-(+)ssRNA-51 |   | 2 | 1 | 2 | 1 |   | 1 |   | 3 | 1 | 11 |
| S222-(+)ssRNA-52 | 1 | 5 | 2 | 2 |   | 2 | 1 |   | 1 |   | 14 |
| S223-(+)ssRNA-53 | 5 | 5 |   | 2 |   | 1 |   |   | 1 |   | 14 |
| S224-(+)ssRNA-54 |   | 5 | 1 | 4 |   | 3 |   |   | 1 |   | 14 |
| S225-(+)ssRNA-55 |   |   | 1 | 1 |   |   |   | 1 | 2 |   | 5  |
| S226-(+)ssRNA-56 | 4 | 1 | 3 |   |   | 2 |   |   |   |   | 10 |
| S227-(+)ssRNA-57 |   |   | 1 | 1 |   |   | 1 |   | 1 |   | 4  |
| S228-(+)ssRNA-58 |   |   | 1 | 2 |   |   | 1 |   | 1 |   | 5  |
| S229-(+)ssRNA-59 |   |   |   | 2 |   |   |   | 1 |   | 6 | 9  |
| S230-(+)ssRNA-60 |   | 1 |   |   |   |   |   |   | 2 |   | 3  |
| S231-(+)ssRNA-61 | 1 | 1 | 2 | 1 |   | 2 |   |   |   |   | 7  |
| S232-(+)ssRNA-62 |   | 2 | 3 | 2 |   |   |   |   |   |   | 7  |
| S233-(+)ssRNA-63 | 1 |   | 3 | 2 | 1 | 1 |   |   | 2 |   | 10 |
| S234-(+)ssRNA-64 | 2 | 1 |   | 2 |   |   | 4 |   |   |   | 9  |
| S235-(+)ssRNA-65 | 1 | 2 | 4 | 1 | 1 |   |   | 1 | 1 |   | 11 |
| S236-(+)ssRNA-66 | 2 | 3 | 3 | 2 |   | 1 | 3 | 1 | 2 |   | 17 |
| S237-(+)ssRNA-67 |   |   | 1 |   |   |   | 1 |   |   |   | 2  |
| S238-(+)ssRNA-68 |   | 1 |   | 1 |   |   |   |   |   |   | 2  |
| S239-(+)ssRNA-69 | 2 | 1 | 1 | 1 |   |   |   |   | 1 |   | 6  |
| S240-(+)ssRNA-70 |   | 2 | 1 | 1 |   |   |   |   | 1 |   | 5  |
| S241-(+)ssRNA-71 |   | 2 | 1 |   |   |   |   |   |   |   | 3  |
| S242-(+)ssRNA-72 |   |   | 1 |   |   |   |   | 1 |   | 1 | 3  |
| S243-(+)ssRNA-73 |   | 1 |   |   |   |   |   |   | 1 |   | 2  |
| S244-(+)ssRNA-74 |   | 1 | 2 | 1 |   |   |   | 6 |   | 1 | 11 |
| S245-(+)ssRNA-75 |   |   |   |   | 1 |   |   |   |   |   | 1  |
| S246-(+)ssRNA-76 |   |   |   |   |   |   |   | 3 |   |   | 3  |
| S247-(+)ssRNA-77 |   |   | 3 | 2 |   | 1 |   |   |   |   | 6  |
| S248-(+)ssRNA-78 | 1 | 1 | 1 |   |   | 1 | 1 |   | 2 |   | 7  |
| S249-(+)ssRNA-79 | 1 | 2 | 2 |   | 1 |   | 2 |   |   |   | 8  |
| S250-(+)ssRNA-80 |   | 2 |   | 1 |   |   | 1 |   |   |   | 4  |
| S251-(+)ssRNA-81 |   |   |   | 1 | 2 | 1 |   | 2 |   |   | 6  |
| S252-(+)ssRNA-82 |   |   |   |   |   |   |   |   |   |   | 0  |

Additional file 10 Continued

|                  |   |  |   |  |   |  |   |   |   |  |   |
|------------------|---|--|---|--|---|--|---|---|---|--|---|
| S253-(+)ssRNA-83 | 1 |  | 2 |  |   |  | 1 |   |   |  | 4 |
| S254-(+)ssRNA-84 |   |  | 1 |  |   |  |   |   |   |  | 1 |
| S255-(+)ssRNA-85 |   |  | 2 |  |   |  |   |   |   |  | 2 |
| S256-(+)ssRNA-86 |   |  |   |  |   |  |   | 1 | 2 |  | 3 |
| S257-(+)ssRNA-87 |   |  | 2 |  | 1 |  |   |   |   |  | 3 |
