# Supplementary material for: Coevolution between simple sequence repeats (SSRs) and virus genome size
Source: PubMed Central journal article supplement (PMC3585866; doi:10.1186/1471-2164-13-435), 2012-08-30
Supplement: 1471-2164-13-435-S14.pdf [file 1471-2164-13-435-S14.pdf]

## Additional file 11 Occurrence of tetra-, penta- and hexa- SSRs in analyzed virus genomes

| No. Type     | Tetra- |                                                                                                                             | Penta- |                      | Hexa- |                        |
|--------------|--------|-----------------------------------------------------------------------------------------------------------------------------|--------|----------------------|-------|------------------------|
|              | Total  | Repeat motifs                                                                                                               | Total  | Repeat motifs        | Total | Repeat motifs          |
| S1-dsDNA-1   | 1      | tctt (1)                                                                                                                    | 1      | tttaa (1)            | 1     | tcgtgt (1)             |
| S2-dsDNA-2   | 0      |                                                                                                                             | 0      |                      | 0     |                        |
| S3-dsDNA-3   | 1      | gttt (1)                                                                                                                    | 0      |                      | 0     |                        |
| S4-dsDNA-4   | 0      |                                                                                                                             | 0      |                      | 0     |                        |
| S5-dsDNA-5   | 0      |                                                                                                                             | 0      |                      | 0     |                        |
| S6-dsDNA-6   | 0      |                                                                                                                             | 0      |                      | 0     |                        |
| S7-dsDNA-7   | 1      | cgac (1)                                                                                                                    | 0      |                      | 0     |                        |
| S8-dsDNA-8   | 1      | aatt (1)                                                                                                                    | 0      |                      | 0     |                        |
| S9-dsDNA-9   | 1      | aaga (1)                                                                                                                    | 0      |                      | 0     |                        |
| S10-dsDNA-10 | 1      | cggc (1)                                                                                                                    | 0      |                      | 0     |                        |
| S11-dsDNA-11 | 0      |                                                                                                                             | 1      | ggcgc (1)            | 0     |                        |
| S12-dsDNA-12 | 0      |                                                                                                                             | 0      |                      | 0     |                        |
| S13-dsDNA-13 | 0      |                                                                                                                             | 0      |                      | 0     |                        |
| S14-dsDNA-14 | 0      |                                                                                                                             | 0      |                      | 0     |                        |
| S15-dsDNA-15 | 0      |                                                                                                                             | 0      |                      | 0     |                        |
| S16-dsDNA-16 | 2      | aaat (1); ttca (1)                                                                                                          | 0      |                      | 0     |                        |
| S17-dsDNA-17 | 0      |                                                                                                                             | 0      |                      | 0     |                        |
| S18-dsDNA-18 | 0      |                                                                                                                             | 0      |                      | 0     |                        |
| S19-dsDNA-19 | 0      |                                                                                                                             | 0      |                      | 0     |                        |
| S20-dsDNA-20 | 0      |                                                                                                                             | 0      |                      | 0     |                        |
| S21-dsDNA-21 | 1      | aaag (1)                                                                                                                    | 0      |                      | 0     |                        |
| S22-dsDNA-22 | 0      |                                                                                                                             | 2      | aatat (1); atatt (1) | 0     |                        |
| S23-dsDNA-23 | 0      |                                                                                                                             | 0      |                      | 0     |                        |
| S24-dsDNA-24 | 1      | cgtg (1)                                                                                                                    | 0      |                      | 0     |                        |
| S25-dsDNA-25 | 5      | atag (1); atta (1);<br>tgaa (1); ttat (1);<br>ttta (1)                                                                      | 1      | aattc (1)            | 2     | aatagg (1); ttctta (1) |
| S26-dsDNA-26 | 20     | actc (3); agcg (1);<br>cact (1); ccca (1);<br>cgag (2); ctcg (4);<br>gagc (1); gagt (4);<br>gtga (1); taat (1);<br>tcac (1) | 0      |                      | 2     | agttac (1); acactc (1) |
| S27-dsDNA-27 | 10     | aata (1); aatt (1);<br>agtt (1); atac (1);<br>gatg (1); tatt (1);<br>tctt (1); ttac (1);<br>ttat (1); ttgg (1)              | 1      | attat (1)            | 0     |                        |
| S28-dsDNA-28 | 8      | aaat (2); aatt (1);                                                                                                         | 1      | atatt (1)            | 1     | gataat (1)             |

|              |    |                                                                                                                |   |                                               |    |                                                                                                                                                                                                                                    |
|--------------|----|----------------------------------------------------------------------------------------------------------------|---|-----------------------------------------------|----|------------------------------------------------------------------------------------------------------------------------------------------------------------------------------------------------------------------------------------|
|              |    | tca (1); attt (1);<br>gatg (1); tta (2)                                                                        |   |                                               |    |                                                                                                                                                                                                                                    |
| S29-dsDNA-29 | 4  | aaat (1); ggta (1);<br>gttc (1); tacg (1)                                                                      | 0 |                                               | 0  |                                                                                                                                                                                                                                    |
| S30-dsDNA-30 | 8  | aata (1); agtg (1);<br>cact (1); gatg (1);<br>taca (1); tatt (1);<br>ttta (2)                                  | 1 | tgaaa (1)                                     | 3  | atectt (1); aatgac (1);<br>ataagg (1)                                                                                                                                                                                              |
| S31-dsDNA-31 | 3  | ccgc (1); gagc<br>(1); tgcg (1)                                                                                | 2 | gcgcg (1); cgcgc (1)                          | 3  | ctgcgc (1); gagcgc (1);<br>tccacg (1)                                                                                                                                                                                              |
| S32-dsDNA-32 | 2  | caaa (1); aatg (1)                                                                                             | 0 |                                               | 0  |                                                                                                                                                                                                                                    |
| S33-dsDNA-33 | 22 | aaac (1); aaat (3);<br>aata (3); aatt (3);<br>ataa (3); atac (1);<br>attt (4); tatt (1);<br>ttat (2); tttc (1) | 6 | atata (2); taata (2);<br>tattt (1); ttata (1) | 3  | taaata (1); tatatt (1);<br>tcaggt (1)                                                                                                                                                                                              |
| S34-dsDNA-34 | 6  | ataa (1); atca (2);<br>attt (1); tgat (2)                                                                      | 0 |                                               | 0  |                                                                                                                                                                                                                                    |
| S35-dsDNA-35 | 7  | aaat (2); aata (1);<br>gaaa (1); gttt (1);<br>tggt (1); ttga (1)                                               | 2 | atattt (1); atatt (1)                         | 1  | gaaacg (1)                                                                                                                                                                                                                         |
| S36-dsDNA-36 | 6  | aaat (1); ataa (1);<br>gttg (1); tcga (1);<br>ttga (1); ttg (1)                                                | 1 | tcgct (1)                                     | 1  | cggtcg (1)                                                                                                                                                                                                                         |
| S37-dsDNA-37 | 0  |                                                                                                                | 0 |                                               | 0  |                                                                                                                                                                                                                                    |
| S38-dsDNA-38 | 1  | aatt (1)                                                                                                       | 2 | tttat (1); ataata (1)                         | 2  | atattt (1); ttaaaa (1)                                                                                                                                                                                                             |
| S39-dsDNA-39 | 1  | accg (1)                                                                                                       | 0 |                                               | 0  |                                                                                                                                                                                                                                    |
| S40-dsDNA-40 | 2  | caaa (1); gttt (1)                                                                                             | 4 | ataat (1); atacg (1);<br>gcgga (1); gctcc (1) | 2  | ggtcct (1); tgttat (1)                                                                                                                                                                                                             |
| S41-dsDNA-41 | 11 | aaag (1); aatt (2);<br>accg (1); atgt (1);<br>cggt (1); taaa (1);<br>taat (1); ttaa (2);<br>ttat (1)           | 1 | cctac (1)                                     | 19 | actgaa (1); cagcaa (1);<br>ccgacc (1); ccgatg (1);<br>cgacat (1); ctcttt (1);<br>gaggcg (1); gatggc (2);<br>gcagat (1); ggcgga (1);<br>ggtgcc (1); ggtggc (2);<br>tcactt (1); tgccga (1);<br>tgcgtt (1); tggcgc (1);<br>tttcag (1) |
| S42-dsDNA-42 | 13 | aaag (1); aatt (3);<br>accg (1); atgt (1);<br>cggt (1); taaa (1);<br>taat (1); ttaa (3);<br>ttat (1)           | 0 |                                               | 3  | ctgcat (1); tcatcg (1);<br>tggagg (1)                                                                                                                                                                                              |
| S43-dsDNA-43 | 4  | ataa (1); gttt (1);                                                                                            | 2 | aaaat (1); aatta (1)                          | 3  | agggtgt (2); ggcgga (1)                                                                                                                                                                                                            |

|              |    |                                                                                                                                                                                                               |   |                      |    |                                                                                                                                  |
|--------------|----|---------------------------------------------------------------------------------------------------------------------------------------------------------------------------------------------------------------|---|----------------------|----|----------------------------------------------------------------------------------------------------------------------------------|
|              |    | tatt (1); ttta (1)                                                                                                                                                                                            |   |                      |    |                                                                                                                                  |
| S44-dsDNA-44 | 9  | aaat (2); acaa (1);<br>ggtg (1); gtgg (1);<br>tgat (1); tggg (1);<br>ttta (2)                                                                                                                                 | 1 | ataat (1)            | 1  | tcatct (1)                                                                                                                       |
| S45-dsDNA-45 | 5  | aacc (1); aaga (1);<br>atgc (1); ttct (1);<br>ttgg (1)                                                                                                                                                        | 0 |                      | 8  | accaga (1); aggagt (2);<br>atctgg (1); cagcaa (1);<br>cgatga (1); cttcct (1);<br>gaggaa (1)                                      |
| S46-dsDNA-46 | 4  | attc (1); cacg (1);<br>gagg (2)                                                                                                                                                                               | 3 | ggcgc (1); ttgtc (2) | 2  | tccgag (1); tgcccg (1)                                                                                                           |
| S47-dsDNA-47 | 19 | caaa (1); cacc (1);<br>ccca (1); cccg (1);<br>ccgg (1); cgcc<br>(1); cggc (1);<br>ggcg (1); ggtg<br>(2); gtgg (7); tggg<br>(1); ttta (1)                                                                      | 4 | cccgg (2); ggccg (2) | 4  | tggggc (2); tggggt (1);<br>ttgggg (1)                                                                                            |
| S48-dsDNA-48 | 5  | acag (1); accg<br>(1); cggg (1); gttg<br>(1); tgtc (1)                                                                                                                                                        | 2 | tgggg (1); cccca (1) | 1  | gaggac (1)                                                                                                                       |
| S49-dsDNA-49 | 5  | atag (1); attt (1);<br>taaa (1); tatg (1);<br>tctt (1)                                                                                                                                                        | 2 | aatat (1); tatat (1) | 26 | aaccct (9); acccta (3);<br>agggtt (2); ccctaa (1);<br>cctaac (1); ctaacc (2);<br>gggtta (4); ggtag (1);<br>taacc (1); tagggt (2) |
| S50-dsDNA-50 | 3  | aaag (1); agcc<br>(1); tggt (1)                                                                                                                                                                               | 0 |                      | 0  |                                                                                                                                  |
| S51-dsDNA-51 | 2  | gtcc (1); tgta (1)                                                                                                                                                                                            | 0 |                      | 0  |                                                                                                                                  |
| S52-dsDNA-52 | 18 | acgg (1); agct (1);<br>agtt (1); catc (1);<br>cgag (1); cgtt (1);<br>ctgt (1); gacc (1);<br>gcgg (1); ggac<br>(1); ggga (1);<br>gtga (1); gtgc (1);<br>tata (1); tcac (1);<br>tcga (1); tcgc (1);<br>tttc (1) | 0 |                      | 5  | cggcag (1); ggcgtc (1);<br>tcagcc (1); tgatgc (1);<br>tgccgg (1)                                                                 |
| S53-dsDNA-53 | 1  | tggt (1)                                                                                                                                                                                                      | 0 |                      | 27 | aaccct (1); acccta (6);<br>ccctaa (2); cctaac (5);<br>ctaacc (2); gtatgt (1);<br>taacc (1); tgatgt (3);<br>tgtgta (6)            |

|              |    |                                                                                                                                                              |   |                     |   |            |
|--------------|----|--------------------------------------------------------------------------------------------------------------------------------------------------------------|---|---------------------|---|------------|
| S54-dsDNA-54 | 5  | ttat (1); ccca (1);<br>ggcg (3)                                                                                                                              | 0 |                     | 0 |            |
| S55-dsDNA-55 | 2  | aaat (1); aaca (1)                                                                                                                                           | 0 |                     | 0 |            |
| S56-dsDNA-56 | 0  |                                                                                                                                                              | 0 |                     | 1 | gcggca (1) |
| S57-dsDNA-57 | 0  |                                                                                                                                                              | 0 |                     | 0 |            |
| S58-dsDNA-58 | 0  |                                                                                                                                                              | 0 |                     | 0 |            |
| S59-dsDNA-59 | 0  |                                                                                                                                                              | 0 |                     | 0 |            |
| S60-dsDNA-60 | 0  |                                                                                                                                                              | 0 |                     | 0 |            |
| S61-dsDNA-61 | 0  |                                                                                                                                                              | 0 |                     | 0 |            |
| S62-dsDNA-62 | 0  |                                                                                                                                                              | 0 |                     | 0 |            |
| S63-dsDNA-63 | 0  |                                                                                                                                                              | 0 |                     | 0 |            |
| S64-dsDNA-64 | 0  |                                                                                                                                                              | 0 |                     | 0 |            |
| S65-dsDNA-65 | 0  |                                                                                                                                                              | 0 |                     | 0 |            |
| S66-dsDNA-66 | 0  |                                                                                                                                                              | 0 |                     | 0 |            |
| S67-dsDNA-67 | 0  |                                                                                                                                                              | 0 |                     | 0 |            |
| S68-dsDNA-68 | 0  |                                                                                                                                                              | 0 |                     | 0 |            |
| S69-dsDNA-69 | 0  |                                                                                                                                                              | 0 |                     | 0 |            |
| S70-dsDNA-70 | 0  |                                                                                                                                                              | 0 |                     | 0 |            |
| S71-dsDNA-71 | 1  | aggg (1)                                                                                                                                                     | 0 |                     | 0 |            |
| S72-dsDNA-72 | 0  |                                                                                                                                                              | 0 |                     | 0 |            |
| S73-dsDNA-73 | 0  |                                                                                                                                                              | 0 |                     | 0 |            |
| S74-dsDNA-74 | 0  |                                                                                                                                                              | 0 |                     | 0 |            |
| S75-dsDNA-75 | 0  |                                                                                                                                                              | 0 |                     | 0 |            |
| S76-dsDNA-76 | 17 | aatc (1); ataa (1);<br>atgc (1); cata (1);<br>ccat (2); cctt (1);<br>ctca (2); gtat (1);<br>taca (1); taaa (2);<br>tgaa (1); tgga (1);<br>ttaa (1); ttgt (1) | 3 | ttaac (2) tatag (1) | 1 | atTTTT (1) |
| S77-dsDNA-77 | 6  | cacc (1); ccac (1);<br>cgat (1); cgtc (1);<br>gtat (1); taaa (1)                                                                                             | 0 |                     | 0 |            |
| S78-ssDNA-1  | 0  |                                                                                                                                                              | 0 |                     | 0 |            |
| S79-ssDNA-2  | 0  |                                                                                                                                                              | 0 |                     | 0 |            |
| S80-ssDNA-3  | 0  |                                                                                                                                                              | 0 |                     | 0 |            |
| S81-ssDNA-4  | 0  |                                                                                                                                                              | 0 |                     | 0 |            |
| S82-ssDNA-5  | 0  |                                                                                                                                                              | 0 |                     | 0 |            |
| S83-ssDNA-6  | 0  |                                                                                                                                                              | 0 |                     | 0 |            |
| S84-ssDNA-7  | 0  |                                                                                                                                                              | 0 |                     | 0 |            |
| S85-ssDNA-8  | 0  |                                                                                                                                                              | 0 |                     | 0 |            |
| S86-ssDNA-9  | 0  |                                                                                                                                                              | 0 |                     | 0 |            |
| S87-ssDNA-10 | 0  |                                                                                                                                                              | 0 |                     | 0 |            |

|                 |   |                    |   |           |   |            |
|-----------------|---|--------------------|---|-----------|---|------------|
| S88-ssDNA-11    | 1 | ttta (1)           | 0 |           | 0 |            |
| S89-ssDNA-12    | 0 |                    | 0 |           | 0 |            |
| S90-ssDNA-13    | 0 |                    | 0 |           | 0 |            |
| S91-ssDNA-14    | 0 |                    | 1 | taaat (1) | 0 |            |
| S92-ssDNA-15    | 0 |                    | 0 |           | 0 |            |
| S93-ssDNA-16    | 0 |                    | 0 |           | 0 |            |
| S94-ssDNA-17    | 0 |                    | 0 |           | 0 |            |
| S95-ssDNA-18    | 4 | cgct (2); gagc (2) | 0 |           | 0 |            |
| S96-ssDNA-19    | 0 |                    | 0 |           | 0 |            |
| S97-ssDNA-20    | 0 |                    | 0 |           | 0 |            |
| S98-ssDNA-21    | 0 |                    | 0 |           | 0 |            |
| S99-ssDNA-22    | 1 | taaa (1)           | 0 |           | 0 |            |
| S100-ssDNA-23   | 0 |                    | 0 |           | 0 |            |
| S101-ssDNA-24   | 0 |                    | 0 |           | 0 |            |
| S102-dsDNA-RT-1 | 0 |                    | 0 |           | 0 |            |
| S103-dsDNA-RT-2 | 0 |                    | 0 |           | 0 |            |
| S104-dsDNA-RT-3 | 0 |                    | 0 |           | 0 |            |
| S105-dsDNA-RT-4 | 0 |                    | 0 |           | 0 |            |
| S106-dsDNA-RT-5 | 1 | gaaa (1)           | 0 |           | 0 |            |
| S107-dsDNA-RT-6 | 0 |                    | 0 |           | 0 |            |
| S108-dsDNA-RT-7 | 0 |                    | 0 |           | 0 |            |
| S109-dsDNA-RT-8 | 0 |                    | 0 |           | 0 |            |
| S110-ssRNA-RT-1 | 1 | ccta (1)           | 0 |           | 0 |            |
| S111-ssRNA-RT-2 | 0 |                    | 0 |           | 0 |            |
| S112-ssRNA-RT-3 | 0 |                    | 0 |           | 0 |            |
| S113-ssRNA-RT-4 | 0 |                    | 0 |           | 0 |            |
| S114-ssRNA-RT-5 | 0 |                    | 0 |           | 0 |            |
| S115-ssRNA-RT-6 | 1 | aaat (1)           | 0 |           | 0 |            |
| S116-ssRNA-RT-7 | 0 |                    | 0 |           | 1 | agaggt (1) |
| S117-dsRNA-1    | 0 |                    | 0 |           | 0 |            |
| S118-dsRNA-2    | 0 |                    | 0 |           | 0 |            |
| S119-dsRNA-3    | 0 |                    | 0 |           | 0 |            |
| S120-dsRNA-4    | 0 |                    | 0 |           | 0 |            |
| S121-dsRNA-5    | 1 | ccgt (1)           | 0 |           | 0 |            |
| S122-dsRNA-6    | 0 |                    | 0 |           | 0 |            |
| S123-dsRNA-7    | 0 |                    | 0 |           | 0 |            |
| S124-dsRNA-8    | 0 |                    | 0 |           | 0 |            |
| S125-dsRNA-9    | 0 |                    | 0 |           | 0 |            |
| S126-dsRNA-10   | 0 |                    | 0 |           | 0 |            |
| S127-dsRNA-11   | 0 |                    | 0 |           | 0 |            |
| S128-dsRNA-12   | 1 | atac (1)           | 0 |           | 0 |            |
| S129-dsRNA-13   | 0 |                    | 0 |           | 0 |            |
| S130-dsRNA-14   | 0 |                    | 0 |           | 0 |            |

|                  |   |                    |   |                     |   |  |
|------------------|---|--------------------|---|---------------------|---|--|
| S131-dsRNA-15    | 0 |                    | 0 |                     | 0 |  |
| S132-dsRNA-16    | 0 |                    | 0 |                     | 0 |  |
| S133-dsRNA-17    | 0 |                    | 0 |                     | 0 |  |
| S134-dsRNA-18    | 0 |                    | 0 |                     | 0 |  |
| S135-dsRNA-19    | 0 |                    | 0 |                     | 0 |  |
| S136-dsRNA-20    | 0 |                    | 0 |                     | 0 |  |
| S137-dsRNA-21    | 0 |                    | 0 |                     | 0 |  |
| S138-dsRNA-22    | 0 |                    | 0 |                     | 0 |  |
| S139-dsRNA-23    | 0 |                    | 0 |                     | 0 |  |
| S140-(-)ssRNA-1  | 0 |                    | 0 |                     | 0 |  |
| S141-(-)ssRNA-2  | 0 |                    | 0 |                     | 0 |  |
| S142-(-)ssRNA-3  | 0 |                    | 0 |                     | 0 |  |
| S143-(-)ssRNA-4  | 1 | caat (1)           | 0 |                     | 0 |  |
| S144-(-)ssRNA-5  | 0 |                    | 0 |                     | 0 |  |
| S145-(-)ssRNA-6  | 0 |                    | 0 |                     | 0 |  |
| S146-(-)ssRNA-7  | 0 |                    | 0 |                     | 0 |  |
| S147-(-)ssRNA-8  | 0 |                    | 0 |                     | 0 |  |
| S148-(-)ssRNA-9  | 2 | aata (1); tcga (1) | 0 |                     | 0 |  |
| S149-(-)ssRNA-10 | 0 |                    | 0 |                     | 0 |  |
| S150-(-)ssRNA-11 | 0 |                    | 0 |                     | 0 |  |
| S151-(-)ssRNA-12 | 0 |                    | 0 |                     | 0 |  |
| S152-(-)ssRNA-13 | 0 |                    | 0 |                     | 0 |  |
| S153-(-)ssRNA-14 | 0 |                    | 0 |                     | 0 |  |
| S154-(-)ssRNA-15 | 0 |                    | 0 |                     | 0 |  |
| S155-(-)ssRNA-16 | 0 |                    | 0 |                     | 0 |  |
| S156-(-)ssRNA-17 | 0 |                    | 0 |                     | 0 |  |
| S157-(-)ssRNA-18 | 0 |                    | 0 |                     | 0 |  |
| S158-(-)ssRNA-19 | 0 |                    | 0 |                     | 0 |  |
| S159-(-)ssRNA-20 | 0 |                    | 0 |                     | 0 |  |
| S160-(-)ssRNA-21 | 0 |                    | 0 |                     | 0 |  |
| S161-(-)ssRNA-22 | 1 | aagc (1)           | 0 |                     | 0 |  |
| S162-(-)ssRNA-23 | 1 | agga (1)           | 0 |                     | 0 |  |
| S163-(-)ssRNA-24 | 1 | tgta (1)           | 0 |                     | 0 |  |
| S164-(-)ssRNA-25 | 1 | cttt (1)           | 0 |                     | 0 |  |
| S165-(-)ssRNA-26 | 0 |                    | 0 |                     | 0 |  |
| S166-(-)ssRNA-27 | 0 |                    | 0 |                     | 0 |  |
| S167-(-)ssRNA-28 | 0 |                    | 2 | taaaa (1); ttta (1) | 0 |  |
| S168-(-)ssRNA-29 | 0 |                    | 0 |                     | 0 |  |
| S169-(-)ssRNA-30 | 0 |                    | 0 |                     | 0 |  |
| S170-(-)ssRNA-31 | 0 |                    | 0 |                     | 0 |  |
| S171-(+)ssRNA-1  | 0 |                    | 0 |                     | 0 |  |
| S172-(+)ssRNA-2  | 0 |                    | 0 |                     | 0 |  |
| S173-(+)ssRNA-3  | 0 |                    | 0 |                     | 0 |  |

|                  |   |                                 |   |           |   |            |
|------------------|---|---------------------------------|---|-----------|---|------------|
| S174-(+)ssRNA-4  | 0 |                                 | 0 |           | 0 |            |
| S175-(+)ssRNA-5  | 0 |                                 | 0 |           | 0 |            |
| S176-(+)ssRNA-6  | 0 |                                 | 0 |           | 0 |            |
| S177-(+)ssRNA-7  | 0 |                                 | 0 |           | 0 |            |
| S178-(+)ssRNA-8  | 0 |                                 | 0 |           | 0 |            |
| S179-(+)ssRNA-9  | 0 |                                 | 0 |           | 0 |            |
| S180-(+)ssRNA-10 | 0 |                                 | 0 |           | 0 |            |
| S181-(+)ssRNA-11 | 0 |                                 | 0 |           | 0 |            |
| S182-(+)ssRNA-12 | 3 | ctcc (1); tcct (1);<br>ttag (1) | 0 |           | 0 |            |
| S183-(+)ssRNA-13 | 0 |                                 | 0 |           | 0 |            |
| S184-(+)ssRNA-14 | 0 |                                 | 0 |           | 0 |            |
| S185-(+)ssRNA-15 | 0 |                                 | 0 |           | 0 |            |
| S186-(+)ssRNA-16 | 0 |                                 | 0 |           | 0 |            |
| S187-(+)ssRNA-17 | 0 |                                 | 0 |           | 0 |            |
| S188-(+)ssRNA-18 | 0 |                                 | 0 |           | 0 |            |
| S189-(+)ssRNA-19 | 0 |                                 | 0 |           | 0 |            |
| S190-(+)ssRNA-20 | 0 |                                 | 0 |           | 0 |            |
| S191-(+)ssRNA-21 | 0 |                                 | 0 |           | 0 |            |
| S192-(+)ssRNA-22 | 0 |                                 | 0 |           | 0 |            |
| S193-(+)ssRNA-23 | 2 | tgtc (2)                        | 0 |           | 0 |            |
| S194-(+)ssRNA-24 | 0 |                                 | 0 |           | 1 | gcagag (1) |
| S195-(+)ssRNA-25 | 0 |                                 | 0 |           | 0 |            |
| S196-(+)ssRNA-26 | 0 |                                 | 2 | aaaca (2) | 0 |            |
| S197-(+)ssRNA-27 | 0 |                                 | 0 |           | 0 |            |
| S198-(+)ssRNA-28 | 0 |                                 | 0 |           | 0 |            |
| S199-(+)ssRNA-29 | 0 |                                 | 0 |           | 0 |            |
| S200-(+)ssRNA-30 | 0 |                                 | 0 |           | 0 |            |
| S201-(+)ssRNA-31 | 0 |                                 | 0 |           | 0 |            |
| S202-(+)ssRNA-32 | 1 | ggtt (1)                        | 0 |           | 0 |            |
| S203-(+)ssRNA-33 | 0 |                                 | 0 |           | 0 |            |
| S204-(+)ssRNA-34 | 0 |                                 | 0 |           | 0 |            |
| S205-(+)ssRNA-35 | 0 |                                 | 0 |           | 0 |            |
| S206-(+)ssRNA-36 | 0 |                                 | 0 |           | 0 |            |
| S207-(+)ssRNA-37 | 0 |                                 | 0 |           | 0 |            |
| S208-(+)ssRNA-38 | 0 |                                 | 0 |           | 0 |            |
| S209-(+)ssRNA-39 | 0 |                                 | 0 |           | 0 |            |
| S210-(+)ssRNA-40 | 1 | cctc (1)                        | 0 |           | 0 |            |
| S211-(+)ssRNA-41 | 0 |                                 | 0 |           | 0 |            |
| S212-(+)ssRNA-42 | 0 |                                 | 0 |           | 0 |            |
| S213-(+)ssRNA-43 | 0 |                                 | 0 |           | 0 |            |
| S214-(+)ssRNA-44 | 0 |                                 | 0 |           | 0 |            |
| S215-(+)ssRNA-45 | 0 |                                 | 0 |           | 0 |            |

|                  |   |          |   |  |   |            |
|------------------|---|----------|---|--|---|------------|
| S216-(+)ssRNA-46 | 0 |          | 0 |  | 0 |            |
| S217-(+)ssRNA-47 | 0 |          | 0 |  | 0 |            |
| S218-(+)ssRNA-48 | 0 |          | 0 |  | 0 |            |
| S219-(+)ssRNA-49 | 0 |          | 0 |  | 0 |            |
| S220-(+)ssRNA-50 | 0 |          | 0 |  | 0 |            |
| S221-(+)ssRNA-51 | 0 |          | 0 |  | 0 |            |
| S222-(+)ssRNA-52 | 0 |          | 0 |  | 0 |            |
| S223-(+)ssRNA-53 | 0 |          | 0 |  | 0 |            |
| S224-(+)ssRNA-54 | 0 |          | 0 |  | 0 |            |
| S225-(+)ssRNA-55 | 0 |          | 0 |  | 0 |            |
| S226-(+)ssRNA-56 | 0 |          | 0 |  | 0 |            |
| S227-(+)ssRNA-57 | 0 |          | 0 |  | 0 |            |
| S228-(+)ssRNA-58 | 1 | gaaa (1) | 0 |  | 0 |            |
| S229-(+)ssRNA-59 | 0 |          | 0 |  | 0 |            |
| S230-(+)ssRNA-60 | 0 |          | 0 |  | 0 |            |
| S231-(+)ssRNA-61 | 0 |          | 0 |  | 0 |            |
| S232-(+)ssRNA-62 | 0 |          | 0 |  | 0 |            |
| S233-(+)ssRNA-63 | 0 |          | 0 |  | 0 |            |
| S234-(+)ssRNA-64 | 0 |          | 0 |  | 0 |            |
| S235-(+)ssRNA-65 | 0 |          | 0 |  | 0 |            |
| S236-(+)ssRNA-66 | 0 |          | 0 |  | 1 | tataat (1) |
| S237-(+)ssRNA-67 | 0 |          | 0 |  | 0 |            |
| S238-(+)ssRNA-68 | 0 |          | 0 |  | 0 |            |
| S239-(+)ssRNA-69 | 0 |          | 0 |  | 0 |            |
| S240-(+)ssRNA-70 | 0 |          | 0 |  | 0 |            |
| S241-(+)ssRNA-71 | 0 |          | 0 |  | 0 |            |
| S242-(+)ssRNA-72 | 0 |          | 0 |  | 0 |            |
| S243-(+)ssRNA-73 | 0 |          | 0 |  | 0 |            |
| S244-(+)ssRNA-74 | 0 |          | 0 |  | 0 |            |
| S245-(+)ssRNA-75 | 0 |          | 0 |  | 0 |            |
| S246-(+)ssRNA-76 | 0 |          | 0 |  | 0 |            |
| S247-(+)ssRNA-77 | 0 |          | 0 |  | 0 |            |
| S248-(+)ssRNA-78 | 1 | aaac (1) | 0 |  | 0 |            |
| S249-(+)ssRNA-79 | 0 |          | 0 |  | 0 |            |
| S250-(+)ssRNA-80 | 0 |          | 0 |  | 0 |            |
| S251-(+)ssRNA-81 | 1 | ccac (1) | 0 |  | 0 |            |
| S252-(+)ssRNA-82 | 0 |          | 0 |  | 0 |            |
| S253-(+)ssRNA-83 | 0 |          | 0 |  | 0 |            |
| S254-(+)ssRNA-84 | 1 | gaag (1) | 0 |  | 0 |            |
| S255-(+)ssRNA-85 | 0 |          | 0 |  | 0 |            |
| S256-(+)ssRNA-86 | 0 |          | 0 |  | 0 |            |
| S257-(+)ssRNA-87 | 0 |          | 0 |  | 0 |            |
