# Supplementary material for: Coevolution between simple sequence repeats (SSRs) and virus genome size
Source: PubMed Central journal article supplement (PMC3585866; doi:10.1186/1471-2164-13-435), 2012-08-30
Supplement: 1471-2164-13-435-S15.pdf [file 1471-2164-13-435-S15.pdf]

## Additional file 12 Hosts of analyzed virus genomes

| No. Type     | Genome size (bp) | Occurrence | Length (bp) | SSRs (%) | Relative abundance | Relative density | Host              | Coding S (%) | Gene No. | GC content (%) |
|--------------|------------------|------------|-------------|----------|--------------------|------------------|-------------------|--------------|----------|----------------|
| S1-dsDNA-1   | 168903           | 472        | 3072        | 1.82     | 2.79               | 18.19            | archaea, bacteria | 93           | 288      | 35             |
| S2-dsDNA-2   | 94800            | 301        | 1967        | 2.07     | 3.18               | 20.75            | bacteria          | 86           | 117      | 47             |
| S3-dsDNA-3   | 33593            | 150        | 976         | 2.91     | 4.47               | 29.05            | bacteria          | 92           | 43       | 50             |
| S4-dsDNA-4   | 36717            | 99         | 632         | 1.72     | 2.70               | 17.21            | bacteria          | 94           | 55       | 52             |
| S5-dsDNA-5   | 132562           | 441        | 2878        | 2.17     | 3.33               | 21.71            | bacteria          | 89           | 209      | 39             |
| S6-dsDNA-6   | 48502            | 174        | 1131        | 2.33     | 3.59               | 23.32            | bacteria          | 87           | 92       | 49             |
| S7-dsDNA-7   | 48836            | 146        | 962         | 1.97     | 2.99               | 19.70            | bacteria          | 91           | 78       | 45             |
| S8-dsDNA-8   | 121750           | 350        | 2258        | 1.85     | 2.87               | 18.55            | bacteria          | 79           | 195      | 39             |
| S9-dsDNA-9   | 22172            | 117        | 788         | 3.55     | 5.28               | 35.54            | bacteria          | 92           | 41       | 36             |
| S10-dsDNA-10 | 52297            | 87         | 625         | 1.20     | 1.66               | 11.95            | bacteria          | 87           | 88       | 62             |
| S11-dsDNA-11 | 46375            | 150        | 992         | 2.14     | 3.23               | 21.39            | bacteria          | 90           | 60       | 51             |
| S12-dsDNA-12 | 41491            | 133        | 873         | 2.10     | 3.21               | 21.04            | archaea, bacteria | 89           | 54       | 63             |
| S13-dsDNA-13 | 39937            | 75         | 490         | 1.23     | 1.88               | 12.27            | bacteria          | 92           | 60       | 48             |
| S14-dsDNA-14 | 19282            | 46         | 294         | 1.52     | 2.39               | 15.25            | bacteria          | 93           | 27       | 39             |
| S15-dsDNA-15 | 41724            | 120        | 812         | 1.95     | 2.88               | 19.46            | bacteria          | 90           | 74       | 47             |
| S16-dsDNA-16 | 70153            | 126        | 890         | 1.27     | 1.80               | 12.69            | bacteria          | 94           | 72       | 41             |
| S17-dsDNA-17 | 14927            | 27         | 196         | 1.31     | 1.81               | 13.13            | bacteria          | 95           | 31       | 48             |
| S18-dsDNA-18 | 10079            | 75         | 490         | 4.86     | 7.44               | 48.62            | bacteria          | 92           | 22       | 42             |
| S19-dsDNA-19 | 11965            | 42         | 279         | 2.33     | 3.51               | 23.32            | archaea, bacteria | 82           | 14       | 31             |
| S20-dsDNA-20 | 40900            | 254        | 1659        | 4.06     | 6.21               | 40.56            | archaea           | 88           | 73       | 33             |
| S21-dsDNA-21 | 20869            | 116        | 749         | 3.59     | 5.56               | 35.89            | archaea           | 91           | 40       | 36             |
| S22-dsDNA-22 | 35450            | 342        | 2257        | 6.37     | 9.65               | 63.67            | archaea           | 79           | 54       | 25             |
| S23-dsDNA-23 | 15465            | 59         | 380         | 2.46     | 3.82               | 24.57            | archaea           | 90           | 33       | 39             |
| S24-dsDNA-24 | 14462            | 35         | 222         | 1.54     | 2.42               | 15.35            | archaea           | 91           | 35       | 38             |
| S25-dsDNA-25 | 194711           | 1287       | 8423        | 4.33     | 6.61               | 43.26            | vertebrates       | 88           | 223      | 33             |
| S26-dsDNA-26 | 139962           | 1103       | 7725        | 5.52     | 7.88               | 55.19            | vertebrates       | 89           | 130      | 63             |
| S27-dsDNA-27 | 288539           | 1892       | 12458       | 4.32     | 6.56               | 43.18            | vertebrates       | 84           | 260      | 30             |
| S28-dsDNA-28 | 149955           | 1724       | 11780       | 7.86     | 11.50              | 78.56            | vertebrates       | 93           | 148      | 25             |
| S29-dsDNA-29 | 161773           | 743        | 4887        | 3.02     | 4.59               | 30.21            | vertebrates       | 95           | 170      | 43             |
| S30-dsDNA-30 | 146454           | 1420       | 9605        | 6.56     | 9.70               | 65.58            | vertebrates       | 96           | 150      | 27             |
| S31-dsDNA-31 | 190289           | 1637       | 11915       | 6.26     | 8.60               | 62.62            | vertebrates       | 85           | 163      | 63             |
| S32-dsDNA-32 | 134721           | 1241       | 8320        | 6.18     | 9.21               | 61.76            | vertebrates       | 94           | 140      | 29             |
| S33-dsDNA-33 | 232392           | 3823       | 26829       | 11.54    | 16.45              | 115.45           | invertebrates     | 91           | 294      | 17             |
| S34-dsDNA-34 | 170101           | 1180       | 8043        | 4.73     | 6.94               | 47.28            | vertebrates       | 87           | 151      | 38             |
| S35-dsDNA-35 | 212482           | 1667       | 11247       | 5.29     | 7.85               | 52.93            | invertebrates     | 90           | 463      | 28             |
| S36-dsDNA-36 | 191100           | 636        | 4381        | 2.29     | 3.33               | 22.93            | invertebrates     | 68           | 126      | 47             |

## Additional file 12 Continued

|              |        |      |       |      |      |       |               |     |     |    |
|--------------|--------|------|-------|------|------|-------|---------------|-----|-----|----|
| S37-dsDNA-37 | 105903 | 413  | 2838  | 2.68 | 3.90 | 26.80 | vertebrates   | 79  | 99  | 55 |
| S38-dsDNA-38 | 102653 | 677  | 4505  | 4.39 | 6.60 | 43.89 | vertebrates   | 92  | 110 | 29 |
| S39-dsDNA-39 | 111362 | 546  | 3682  | 3.31 | 4.90 | 33.06 | vertebrates   | 93  | 125 | 54 |
| S40-dsDNA-40 | 330743 | 1717 | 11432 | 3.46 | 5.19 | 34.56 | algae         | 90  | 699 | 39 |
| S41-dsDNA-41 | 335593 | 1825 | 13227 | 3.94 | 5.44 | 39.41 | algae         | 70  | 240 | 51 |
| S42-dsDNA-42 | 407339 | 2170 | 14913 | 3.66 | 5.33 | 36.61 | algae         | 90  | 478 | 40 |
| S43-dsDNA-43 | 133894 | 725  | 4947  | 3.69 | 5.41 | 36.95 | invertebrates | 91  | 156 | 40 |
| S44-dsDNA-44 | 123500 | 801  | 5610  | 4.54 | 6.49 | 45.43 | invertebrates | 88  | 143 | 45 |
| S45-dsDNA-45 | 305107 | 1731 | 13335 | 4.37 | 5.67 | 43.71 | invertebrates | 92  | 531 | 41 |
| S46-dsDNA-46 | 134226 | 778  | 5563  | 4.14 | 5.80 | 41.45 | vertebrates   | 83  | 90  | 56 |
| S47-dsDNA-47 | 152261 | 1319 | 9352  | 6.14 | 8.66 | 61.42 | vertebrates   | 79  | 77  | 68 |
| S48-dsDNA-48 | 124884 | 645  | 4350  | 3.48 | 5.16 | 34.83 | vertebrates   | 89  | 73  | 46 |
| S49-dsDNA-49 | 177874 | 879  | 6770  | 3.81 | 4.94 | 38.06 | vertebrates   | 73  | 87  | 44 |
| S50-dsDNA-50 | 148687 | 674  | 4388  | 2.95 | 4.53 | 29.51 | vertebrates   | 81  | 79  | 48 |
| S51-dsDNA-51 | 235646 | 1326 | 9391  | 3.99 | 5.63 | 39.85 | vertebrates   | 79  | 167 | 57 |
| S52-dsDNA-52 | 230278 | 1297 | 9550  | 4.15 | 5.63 | 41.47 | vertebrates   | 72  | 168 | 58 |
| S53-dsDNA-53 | 159322 | 1013 | 7792  | 4.89 | 6.36 | 48.91 | vertebrates   | 79  | 88  | 42 |
| S54-dsDNA-54 | 172764 | 891  | 5988  | 3.47 | 5.16 | 34.66 | vertebrates   | 68  | 82  | 59 |
| S55-dsDNA-55 | 112930 | 732  | 4829  | 4.28 | 6.48 | 42.76 | vertebrates   | 87  | 76  | 34 |
| S56-dsDNA-56 | 35937  | 206  | 1476  | 4.11 | 5.73 | 41.07 | vertebrates   | 90  | 18  | 55 |
| S57-dsDNA-57 | 43804  | 191  | 1318  | 3.01 | 4.36 | 30.09 | vertebrates   | 84  | N/A | 54 |
| S58-dsDNA-58 | 29576  | 168  | 1090  | 3.69 | 5.68 | 36.85 | vertebrates   | 92  | 31  | 33 |
| S59-dsDNA-59 | 26163  | 129  | 846   | 3.23 | 4.93 | 32.34 | vertebrates   | 92  | 23  | 37 |
| S60-dsDNA-60 | 5243   | 31   | 214   | 4.08 | 5.91 | 40.82 | vertebrates   | 89  | 8   | 40 |
| S61-dsDNA-61 | 7961   | 54   | 371   | 4.66 | 6.78 | 46.60 | vertebrates   | 84  | 6   | 40 |
| S62-dsDNA-62 | 7746   | 37   | 258   | 3.33 | 4.78 | 33.31 | vertebrates   | 92  | 8   | 42 |
| S63-dsDNA-63 | 7353   | 30   | 206   | 2.80 | 4.08 | 28.02 | vertebrates   | 92  | 7   | 38 |
| S64-dsDNA-64 | 8095   | 29   | 190   | 2.35 | 3.58 | 23.47 | vertebrates   | 91  | 15  | 47 |
| S65-dsDNA-65 | 7841   | 41   | 287   | 3.66 | 5.23 | 36.60 | vertebrates   | 86  | 6   | 44 |
| S66-dsDNA-66 | 7610   | 46   | 309   | 4.06 | 6.04 | 40.60 | vertebrates   | 87  | 7   | 52 |
| S67-dsDNA-67 | 7729   | 20   | 143   | 1.85 | 2.59 | 18.50 | vertebrates   | 89  | 6   | 47 |
| S68-dsDNA-68 | 7304   | 25   | 165   | 2.26 | 3.42 | 22.59 | vertebrates   | 93  | 6   | 49 |
| S69-dsDNA-69 | 7687   | 29   | 197   | 2.56 | 3.77 | 25.63 | vertebrates   | 92  | 6   | 50 |
| S70-dsDNA-70 | 7868   | 31   | 211   | 2.68 | 3.94 | 26.82 | vertebrates   | 90  | 10  | 46 |
| S71-dsDNA-71 | 8607   | 60   | 454   | 5.27 | 6.97 | 52.75 | vertebrates   | 77  | 7   | 41 |
| S72-dsDNA-72 | 7815   | 33   | 219   | 2.80 | 4.22 | 28.02 | vertebrates   | 86  | 7   | 40 |
| S73-dsDNA-73 | 7614   | 32   | 219   | 2.88 | 4.20 | 28.76 | vertebrates   | 90  | 11  | 46 |
| S74-dsDNA-74 | 7276   | 32   | 226   | 3.11 | 4.40 | 31.06 | vertebrates   | 91  | 8   | 43 |
| S75-dsDNA-75 | 7879   | 42   | 288   | 3.66 | 5.33 | 36.55 | vertebrates   | 89  | 8   | 46 |
| S76-dsDNA-76 | 246734 | 1099 | 7577  | 3.07 | 4.45 | 30.71 | invertebrates | N/A | N/A | 41 |
| S77-dsDNA-77 | 156922 | 559  | 4181  | 2.66 | 3.56 | 26.64 | invertebrates | 68  | 123 | 49 |
| S78-ssDNA-1  | 6407   | 18   | 126   | 1.97 | 2.81 | 19.67 | bacteria      | 91  | 10  | 40 |
| S79-ssDNA-2  | 4491   | 37   | 256   | 5.70 | 8.24 | 57.00 | bacteria      | 48  | 4   | 33 |

## Additional file 12 Continued

|                 |       |    |     |      |       |       |               |     |    |    |
|-----------------|-------|----|-----|------|-------|-------|---------------|-----|----|----|
| S80-ssDNA-3     | 5386  | 8  | 49  | 0.91 | 1.49  | 9.10  | bacteria      | 95  | 11 | 44 |
| S81-ssDNA-4     | 4421  | 24 | 159 | 3.60 | 5.43  | 35.96 | bacteria      | 93  | 9  | 32 |
| S82-ssDNA-5     | 4594  | 26 | 178 | 3.87 | 5.66  | 38.75 | bacteria      | 86  | 11 | 46 |
| S83-ssDNA-6     | 4877  | 15 | 115 | 2.36 | 3.08  | 23.58 | bacteria      | 94  | 12 | 36 |
| S84-ssDNA-7     | 2690  | 10 | 67  | 2.49 | 3.72  | 24.91 | plants        | 82  | 7  | 49 |
| S85-ssDNA-8     | 2994  | 15 | 106 | 3.54 | 5.01  | 35.40 | plants        | 88  | 6  | 39 |
| S86-ssDNA-9     | 5232  | 17 | 116 | 2.22 | 3.25  | 22.17 | plants        | 74  | 8  | 39 |
| S87-ssDNA-10    | 2861  | 15 | 99  | 3.46 | 5.24  | 34.60 | plants        | 89  | 6  | 41 |
| S88-ssDNA-11    | 1758  | 9  | 67  | 3.81 | 5.12  | 38.11 | vertebrates   | 92  | 2  | 48 |
| S89-ssDNA-12    | 2319  | 25 | 166 | 7.16 | 10.78 | 71.58 | vertebrates   | 90  | 2  | 56 |
| S90-ssDNA-13    | 3852  | 41 | 285 | 7.40 | 10.64 | 73.99 | vertebrates   | 70  | 3  | 49 |
| S91-ssDNA-14    | 8024  | 41 | 312 | 3.89 | 5.11  | 38.88 | plants        | 59  | 8  | 39 |
| S92-ssDNA-15    | 6396  | 35 | 250 | 3.91 | 5.47  | 39.09 | plants        | 50  | 5  | 40 |
| S93-ssDNA-16    | 5149  | 27 | 179 | 3.48 | 5.24  | 34.76 | vertebrates   | 86  | 3  | 42 |
| S94-ssDNA-17    | 5594  | 32 | 205 | 3.66 | 5.72  | 36.65 | vertebrates   | 77  | 2  | 43 |
| S95-ssDNA-18    | 4679  | 27 | 206 | 4.40 | 5.77  | 44.03 | vertebrates   | 87  | 10 | 53 |
| S96-ssDNA-19    | 4801  | 30 | 218 | 4.54 | 6.25  | 45.41 | vertebrates   | 82  | 4  | 38 |
| S97-ssDNA-20    | 5517  | 47 | 308 | 5.58 | 8.52  | 55.83 | vertebrates   | 82  | 4  | 48 |
| S98-ssDNA-21    | 5908  | 26 | 189 | 3.20 | 4.40  | 31.99 | invertebrates | 78  | 4  | 37 |
| S99-ssDNA-22    | 5078  | 43 | 292 | 5.75 | 8.47  | 57.50 | invertebrates | 84  | 8  | 39 |
| S100-ssDNA-23   | 3776  | 24 | 166 | 4.40 | 6.36  | 43.96 | invertebrates | 92  | 3  | 37 |
| S101-ssDNA-24   | 5454  | 22 | 170 | 3.12 | 4.03  | 31.17 | invertebrates | 94  | 8  | 38 |
| S102-dsDNA-RT-1 | 3215  | 11 | 72  | 2.24 | 3.42  | 22.40 | vertebrates   | 100 | 4  | 49 |
| S103-dsDNA-RT-2 | 3027  | 9  | 68  | 2.25 | 2.97  | 22.46 | vertebrates   | 100 | 7  | 43 |
| S104-dsDNA-RT-3 | 8024  | 30 | 208 | 2.59 | 3.74  | 25.92 | plants        | 89  | 7  | 39 |
| S105-dsDNA-RT-4 | 8178  | 48 | 301 | 3.68 | 5.87  | 36.81 | plants        | 93  | 9  | 33 |
| S106-dsDNA-RT-5 | 8159  | 75 | 507 | 6.21 | 9.19  | 62.14 | plants        | 93  | 5  | 24 |
| S107-dsDNA-RT-6 | 8002  | 41 | 270 | 3.37 | 5.12  | 33.74 | plants        | 89  | 4  | 33 |
| S108-dsDNA-RT-7 | 7489  | 18 | 129 | 1.72 | 2.40  | 17.23 | plants        | 89  | 4  | 39 |
| S109-dsDNA-RT-8 | 7206  | 27 | 176 | 2.44 | 3.75  | 24.42 | plants        | 90  | 1  | 38 |
| S110-ssRNA-RT-1 | 8805  | 32 | 214 | 2.43 | 3.63  | 24.30 | vertebrates   | 91  | 7  | 43 |
| S111-ssRNA-RT-2 | 8282  | 29 | 187 | 2.26 | 3.50  | 22.58 | vertebrates   | 86  | 3  | 53 |
| S112-ssRNA-RT-3 | 7286  | 31 | 202 | 2.77 | 4.25  | 27.72 | vertebrates   | 65  | 11 | 53 |
| S113-ssRNA-RT-4 | 8419  | 50 | 328 | 3.90 | 5.94  | 38.96 | vertebrates   | 79  | 5  | 54 |
| S114-ssRNA-RT-5 | 9181  | 65 | 440 | 4.79 | 7.08  | 47.93 | vertebrates   | 93  | 9  | 42 |
| S115-ssRNA-RT-6 | 12708 | 50 | 354 | 2.79 | 3.93  | 27.86 | vertebrates   | 86  | 7  | 41 |
| S116-ssRNA-RT-7 | 13246 | 53 | 362 | 2.73 | 4.00  | 27.33 | vertebrates   | 78  | 6  | 38 |
| S117-dsRNA-1    | 13385 | 38 | 260 | 1.94 | 2.84  | 19.42 | bacteria      | 78  | 13 | 55 |
| S118-dsRNA-2    | 23564 | 61 | 402 | 1.71 | 2.59  | 17.06 | vertebrates   | 96  | 11 | 46 |
| S119-dsRNA-3    | 19208 | 77 | 510 | 2.66 | 4.01  | 26.55 | vertebrates   | 96  | 10 | 43 |
| S120-dsRNA-4    | 17448 | 74 | 483 | 2.77 | 4.24  | 27.68 | vertebrates   | 100 | 12 | 32 |
| S121-dsRNA-5    | 29174 | 96 | 646 | 2.21 | 3.29  | 22.14 | vertebrates   | 95  | 13 | 46 |
| S122-dsRNA-6    | 23015 | 67 | 435 | 1.89 | 2.91  | 18.90 | vertebrates   | 94  | 9  | 55 |

## Additional file 12 Continued

|                 |       |     |     |      |      |       |                               |    |    |    |
|-----------------|-------|-----|-----|------|------|-------|-------------------------------|----|----|----|
| S123-dsRNA-7    | 24732 | 72  | 465 | 1.88 | 2.91 | 18.80 | invertebrates                 | 93 | 10 | 43 |
| S124-dsRNA-8    | 29339 | 125 | 820 | 2.79 | 4.26 | 27.95 | plants                        | 94 | 12 | 31 |
| S125-dsRNA-9    | 25709 | 76  | 514 | 2.00 | 2.96 | 19.99 | plants                        | 91 | 12 | 39 |
| S126-dsRNA-10   | 26164 | 74  | 487 | 1.86 | 2.83 | 18.61 | plants                        | 92 | 11 | 44 |
| S127-dsRNA-11   | 20682 | 45  | 311 | 1.50 | 2.18 | 15.04 | vertebrates                   | 86 | 12 | 39 |
| S128-dsRNA-12   | 23433 | 59  | 394 | 1.68 | 2.52 | 16.81 | fungi                         | 93 | 11 | 41 |
| S129-dsRNA-13   | 5881  | 21  | 136 | 2.31 | 3.57 | 23.13 | invertebrates,<br>vertebrates | 93 | 3  | 54 |
| S130-dsRNA-14   | 5898  | 13  | 84  | 1.42 | 2.20 | 14.24 | invertebrates,<br>vertebrates | 96 | 3  | 53 |
| S131-dsRNA-15   | 6603  | 18  | 113 | 1.71 | 2.73 | 17.11 | invertebrates                 | 92 | 2  | 46 |
| S132-dsRNA-16   | 4579  | 11  | 70  | 1.53 | 2.40 | 15.29 | fungi                         | 98 | 3  | 45 |
| S133-dsRNA-17   | 6277  | 21  | 142 | 2.26 | 3.35 | 22.62 | protozoa                      | 89 | 2  | 50 |
| S134-dsRNA-18   | 5284  | 23  | 149 | 2.82 | 4.35 | 28.20 | protozoa                      | 94 | 3  | 46 |
| S135-dsRNA-19   | 6105  | 25  | 181 | 2.96 | 4.10 | 29.65 | fungi                         | 91 | 2  | 39 |
| S136-dsRNA-20   | 3663  | 11  | 74  | 2.02 | 3.00 | 20.20 | plants                        | 90 | 2  | 46 |
| S137-dsRNA-21   | 12640 | 55  | 406 | 3.21 | 4.35 | 32.12 | fungi                         | 91 | 4  | 50 |
| S138-dsRNA-22   | 12734 | 25  | 182 | 1.43 | 1.96 | 14.29 | fungi                         | 89 | 2  | 52 |
| S139-dsRNA-23   | 17635 | 73  | 492 | 2.79 | 4.14 | 27.90 | plants                        | 99 | 1  | 47 |
| S140(-)ssRNA-1  | 8910  | 29  | 185 | 2.08 | 3.25 | 20.76 | vertebrates                   | 97 | 6  | 50 |
| S141(-)ssRNA-2  | 11161 | 47  | 301 | 2.70 | 4.21 | 26.97 | invertebrates,<br>vertebrates | 95 | 5  | 41 |
| S142(-)ssRNA-3  | 11932 | 57  | 366 | 3.07 | 4.78 | 30.67 | invertebrates,<br>vertebrates | 91 | 5  | 45 |
| S143(-)ssRNA-4  | 14900 | 87  | 592 | 3.97 | 5.84 | 39.73 | invertebrates,<br>vertebrates | 95 | 11 | 33 |
| S144(-)ssRNA-5  | 12807 | 55  | 376 | 2.94 | 4.29 | 29.36 | invertebrates,<br>plants      | 90 | 8  | 42 |
| S145(-)ssRNA-6  | 12020 | 43  | 303 | 2.52 | 3.58 | 25.21 | invertebrates,<br>plants      | 95 | 7  | 46 |
| S146(-)ssRNA-7  | 11131 | 53  | 374 | 3.36 | 4.76 | 33.60 | invertebrates,<br>vertebrates | 92 | 6  | 51 |
| S147(-)ssRNA-8  | 19111 | 63  | 392 | 2.05 | 3.30 | 20.51 | vertebrates                   | 76 | 7  | 38 |
| S148(-)ssRNA-9  | 18959 | 72  | 466 | 2.46 | 3.80 | 24.58 | vertebrates                   | 76 | 7  | 41 |
| S149(-)ssRNA-10 | 15384 | 47  | 302 | 1.96 | 3.06 | 19.63 | vertebrates                   | 94 | 9  | 46 |
| S150(-)ssRNA-11 | 15894 | 55  | 358 | 2.25 | 3.46 | 22.52 | vertebrates                   | 89 | 6  | 47 |
| S151(-)ssRNA-12 | 15384 | 60  | 371 | 2.41 | 3.90 | 24.12 | vertebrates                   | 92 | 7  | 42 |
| S152(-)ssRNA-13 | 18234 | 68  | 441 | 2.42 | 3.73 | 24.19 | vertebrates                   | 82 | 6  | 39 |
| S153(-)ssRNA-14 | 15186 | 63  | 401 | 2.64 | 4.15 | 26.41 | vertebrates                   | 90 | 6  | 46 |
| S154(-)ssRNA-15 | 15225 | 80  | 519 | 3.41 | 5.25 | 34.09 | vertebrates                   | 89 | 10 | 33 |
| S155(-)ssRNA-16 | 14071 | 81  | 533 | 3.79 | 5.76 | 37.88 | vertebrates                   | 92 | 9  | 41 |
| S156(-)ssRNA-17 | 12878 | 74  | 482 | 3.74 | 5.75 | 37.43 | plants                        | 83 | 6  | 45 |
| S157(-)ssRNA-18 | 11278 | 72  | 490 | 4.34 | 6.38 | 43.45 | plants                        | 94 | 4  | 34 |

## Additional file 12 Continued

|                 |       |     |     |      |      |       |               |    |    |    |
|-----------------|-------|-----|-----|------|------|-------|---------------|----|----|----|
| S158(-)ssRNA-19 | 13460 | 53  | 347 | 2.58 | 3.94 | 25.78 | vertebrates   | 97 | 10 | 42 |
| S159(-)ssRNA-20 | 12555 | 56  | 360 | 2.87 | 4.46 | 28.67 | vertebrates   | 98 | 9  | 37 |
| S160(-)ssRNA-21 | 10461 | 50  | 322 | 3.08 | 4.78 | 30.78 | vertebrates   | 96 | 7  | 47 |
| S161(-)ssRNA-22 | 14452 | 47  | 318 | 2.20 | 3.25 | 22.00 | vertebrates   | 94 | 11 | 40 |
| S162(-)ssRNA-23 | 12716 | 52  | 379 | 2.98 | 4.09 | 29.80 | vertebrates   | 94 | 10 | 43 |
| S163(-)ssRNA-24 | 12294 | 66  | 452 | 3.68 | 5.37 | 36.77 | vertebrates   | 95 | 4  | 35 |
| S164(-)ssRNA-25 | 11845 | 69  | 482 | 4.07 | 5.83 | 40.69 | vertebrates   | 94 | 3  | 38 |
| S165(-)ssRNA-26 | 18859 | 87  | 568 | 3.01 | 4.61 | 30.12 | vertebrates   | 96 | 3  | 40 |
| S166(-)ssRNA-27 | 11979 | 57  | 394 | 3.29 | 4.76 | 32.89 | vertebrates   | 95 | 4  | 44 |
| S167(-)ssRNA-28 | 16634 | 106 | 698 | 4.20 | 6.37 | 41.96 | plants        | 88 | 5  | 34 |
| S168(-)ssRNA-29 | 17145 | 96  | 624 | 3.64 | 5.60 | 36.40 | plants        | 86 | 7  | 38 |
| S169(-)ssRNA-30 | 10056 | 29  | 180 | 1.79 | 2.88 | 17.90 | vertebrates   | 97 | 4  | 42 |
| S170(-)ssRNA-31 | 1682  | 12  | 77  | 4.58 | 7.13 | 45.78 | vertebrates   | 59 | 2  | 58 |
| S171(+)ssRNA-1  | 3569  | 8   | 48  | 1.34 | 2.24 | 13.45 | bacteria      | 90 | 4  | 52 |
| S172(+)ssRNA-2  | 4215  | 8   | 56  | 1.33 | 1.90 | 13.29 | bacteria      | 95 | 4  | 48 |
| S173(+)ssRNA-3  | 2514  | 7   | 49  | 1.95 | 2.78 | 19.49 | fungi         | 99 | 1  | 58 |
| S174(+)ssRNA-4  | 2728  | 7   | 42  | 1.54 | 2.57 | 15.40 | fungi         | 89 | 1  | 36 |
| S175(+)ssRNA-5  | 7440  | 21  | 139 | 1.87 | 2.82 | 18.68 | vertebrates   | 89 | 1  | 46 |
| S176(+)ssRNA-6  | 7152  | 26  | 169 | 2.36 | 3.64 | 23.63 | vertebrates   | 90 | 1  | 39 |
| S177(+)ssRNA-7  | 7478  | 22  | 144 | 1.93 | 2.94 | 19.26 | vertebrates   | 89 | 3  | 37 |
| S178(+)ssRNA-8  | 7835  | 30  | 307 | 3.92 | 3.83 | 39.18 | vertebrates   | 87 | 1  | 49 |
| S179(+)ssRNA-9  | 8161  | 28  | 196 | 2.40 | 3.43 | 24.02 | vertebrates   | 85 | 1  | 53 |
| S180(+)ssRNA-10 | 7348  | 18  | 125 | 1.70 | 2.45 | 17.01 | vertebrates   | 89 | 1  | 39 |
| S181(+)ssRNA-11 | 8828  | 20  | 127 | 1.44 | 2.27 | 14.39 | vertebrates   | 88 | 1  | 48 |
| S182(+)ssRNA-12 | 8251  | 44  | 302 | 3.66 | 5.33 | 36.60 | vertebrates   | 88 | 1  | 58 |
| S183(+)ssRNA-13 | 7117  | 20  | 134 | 1.88 | 2.81 | 18.83 | vertebrates   | 94 | 1  | 44 |
| S184(+)ssRNA-14 | 9650  | 39  | 253 | 2.62 | 4.04 | 26.22 | invertebrates | 95 | 1  | 42 |
| S185(+)ssRNA-15 | 9185  | 36  | 243 | 2.65 | 3.92 | 26.46 | invertebrates | 87 | 2  | 39 |
| S186(+)ssRNA-16 | 8587  | 26  | 175 | 2.04 | 3.03 | 20.38 | algae         | 90 | 1  | 46 |
| S187(+)ssRNA-17 | 9871  | 35  | 232 | 2.35 | 3.55 | 23.50 | plants        | 92 | 1  | 43 |
| S188(+)ssRNA-18 | 12226 | 36  | 270 | 2.21 | 2.94 | 22.08 | plants        | 85 | 1  | 45 |
| S189(+)ssRNA-19 | 12138 | 57  | 375 | 3.09 | 4.70 | 30.89 | plants        | 90 | 2  | 46 |
| S190(+)ssRNA-20 | 10349 | 46  | 308 | 2.98 | 4.44 | 29.76 | plants        | 93 | 7  | 43 |
| S191(+)ssRNA-21 | 9370  | 23  | 160 | 1.71 | 2.45 | 17.08 | plants        | 94 | 4  | 42 |
| S192(+)ssRNA-22 | 9263  | 33  | 205 | 2.21 | 3.56 | 22.13 | plants        | 92 | 2  | 43 |
| S193(+)ssRNA-23 | 11443 | 43  | 285 | 2.49 | 3.76 | 24.91 | plants        | 89 | 2  | 46 |
| S194(+)ssRNA-24 | 9704  | 36  | 239 | 2.46 | 3.71 | 24.63 | plants        | 94 | 1  | 42 |
| S195(+)ssRNA-25 | 9535  | 25  | 159 | 1.67 | 2.62 | 16.68 | plants        | 97 | 1  | 46 |
| S196(+)ssRNA-26 | 11219 | 48  | 343 | 3.06 | 4.28 | 30.57 | plants        | 88 | 2  | 46 |
| S197(+)ssRNA-27 | 10818 | 27  | 178 | 1.65 | 2.50 | 16.45 | plants        | 95 | 1  | 42 |
| S198(+)ssRNA-28 | 9384  | 19  | 120 | 1.28 | 2.02 | 12.79 | plants        | 97 | 1  | 44 |
| S199(+)ssRNA-29 | 8284  | 18  | 119 | 1.44 | 2.17 | 14.37 | vertebrates   | 97 | 3  | 47 |
| S200(+)ssRNA-30 | 7437  | 17  | 105 | 1.41 | 2.29 | 14.12 | vertebrates   | 99 | 2  | 50 |

## Additional file 12 Continued

|                  |       |     |     |      |      |       |                               |    |     |    |
|------------------|-------|-----|-----|------|------|-------|-------------------------------|----|-----|----|
| S201-(+)ssRNA-31 | 7654  | 28  | 187 | 2.44 | 3.66 | 24.43 | vertebrates                   | 99 | 3   | 48 |
| S202-(+)ssRNA-32 | 7476  | 23  | 152 | 2.03 | 3.08 | 20.33 | vertebrates                   | 98 | 2   | 51 |
| S203-(+)ssRNA-33 | 7176  | 22  | 157 | 2.19 | 3.07 | 21.88 | vertebrates                   | 98 | 3   | 57 |
| S204-(+)ssRNA-34 | 6813  | 25  | 166 | 2.44 | 3.67 | 24.37 | vertebrates                   | 97 | 2   | 44 |
| S205-(+)ssRNA-35 | 7003  | 34  | 222 | 3.17 | 4.86 | 31.70 | vertebrates                   | 97 | 2   | 43 |
| S206-(+)ssRNA-36 | 4540  | 4   | 27  | 0.59 | 0.88 | 5.95  | invertebrates,<br>vertebrates | 95 | 3   | 54 |
| S207-(+)ssRNA-37 | 4528  | 8   | 56  | 1.24 | 1.77 | 12.37 | invertebrates,<br>vertebrates | 87 | 3   | 53 |
| S208-(+)ssRNA-38 | 6625  | 20  | 141 | 2.13 | 3.02 | 21.28 | invertebrates                 | 87 | 3   | 54 |
| S209-(+)ssRNA-39 | 4194  | 15  | 98  | 2.34 | 3.58 | 23.37 | plants                        | 95 | 4   | 51 |
| S210-(+)ssRNA-40 | 5677  | 22  | 149 | 2.62 | 3.88 | 26.25 | plants                        | 86 | 7   | 48 |
| S211-(+)ssRNA-41 | 5987  | 14  | 97  | 1.62 | 2.34 | 16.20 | plants                        | 91 | 6   | 49 |
| S212-(+)ssRNA-42 | 5706  | 12  | 83  | 1.45 | 2.10 | 14.55 | plants                        | 89 | 5   | 49 |
| S213-(+)ssRNA-43 | 4776  | 18  | 115 | 2.41 | 3.77 | 24.08 | plants                        | 87 | 5   | 48 |
| S214-(+)ssRNA-44 | 4003  | 16  | 101 | 2.52 | 4.00 | 25.23 | plants                        | 91 | 6   | 48 |
| S215-(+)ssRNA-45 | 3684  | 13  | 98  | 2.66 | 3.53 | 26.60 | plants                        | 96 | 5   | 48 |
| S216-(+)ssRNA-46 | 5243  | 10  | 60  | 1.14 | 1.91 | 11.44 | plants                        | 87 | 4   | 47 |
| S217-(+)ssRNA-47 | 4437  | 16  | 113 | 2.55 | 3.61 | 25.47 | plants                        | 89 | 5   | 50 |
| S218-(+)ssRNA-48 | 4114  | 11  | 68  | 1.65 | 2.67 | 16.53 | plants                        | 88 | 4   | 50 |
| S219-(+)ssRNA-49 | 4354  | 17  | 113 | 2.60 | 3.90 | 25.95 | plants                        | 93 | 5   | 47 |
| S220-(+)ssRNA-50 | 4326  | 16  | 108 | 2.50 | 3.70 | 24.97 | plants                        | 91 | 6   | 50 |
| S221-(+)ssRNA-51 | 12704 | 40  | 280 | 2.20 | 3.15 | 22.04 | vertebrates                   | 97 | 8   | 51 |
| S222-(+)ssRNA-52 | 27608 | 90  | 597 | 2.16 | 3.26 | 21.62 | vertebrates                   | 95 | 6   | 37 |
| S223-(+)ssRNA-53 | 28475 | 102 | 683 | 2.40 | 3.58 | 23.99 | vertebrates                   | 96 | 6   | 38 |
| S224-(+)ssRNA-54 | 26253 | 111 | 754 | 2.87 | 4.23 | 28.72 | vertebrates                   | 97 | N/A | 46 |
| S225-(+)ssRNA-55 | 10862 | 44  | 285 | 2.62 | 4.05 | 26.24 | vertebrates                   | 94 | 1   | 49 |
| S226-(+)ssRNA-56 | 12573 | 60  | 402 | 3.20 | 4.77 | 31.97 | vertebrates                   | 95 | 1   | 45 |
| S227-(+)ssRNA-57 | 9646  | 40  | 333 | 3.45 | 4.15 | 34.52 | vertebrates                   | 93 | 2   | 58 |
| S228-(+)ssRNA-58 | 11703 | 31  | 208 | 1.78 | 2.65 | 17.77 | vertebrates                   | 96 | 3   | 50 |
| S229-(+)ssRNA-59 | 9755  | 71  | 485 | 4.97 | 7.28 | 49.72 | vertebrates                   | 99 | 2   | 69 |
| S230-(+)ssRNA-60 | 6395  | 32  | 208 | 3.25 | 5.00 | 32.53 | plants                        | 95 | 6   | 43 |
| S231-(+)ssRNA-61 | 10646 | 41  | 276 | 2.59 | 3.85 | 25.93 | plants                        | 83 | 7   | 42 |
| S232-(+)ssRNA-62 | 10221 | 28  | 240 | 2.35 | 2.74 | 23.48 | plants                        | 87 | 8   | 42 |
| S233-(+)ssRNA-63 | 10692 | 43  | 309 | 2.89 | 4.02 | 28.90 | plants                        | 86 | 6   | 43 |
| S234-(+)ssRNA-64 | 12141 | 54  | 369 | 3.04 | 4.45 | 30.39 | plants                        | 84 | 8   | 42 |
| S235-(+)ssRNA-65 | 10401 | 55  | 373 | 3.59 | 5.29 | 35.86 | plants                        | 87 | 9   | 42 |
| S236-(+)ssRNA-66 | 15914 | 55  | 410 | 2.58 | 3.46 | 25.76 | plants                        | 80 | 10  | 40 |
| S237-(+)ssRNA-67 | 8274  | 24  | 155 | 1.87 | 2.90 | 18.73 | plants                        | 88 | 4   | 42 |
| S238-(+)ssRNA-68 | 8622  | 30  | 188 | 2.18 | 3.48 | 21.80 | plants                        | 88 | 5   | 43 |
| S239-(+)ssRNA-69 | 8210  | 33  | 233 | 2.84 | 4.02 | 28.38 | plants                        | 83 | 4   | 46 |
| S240-(+)ssRNA-70 | 8623  | 31  | 212 | 2.46 | 3.60 | 24.59 | plants                        | 82 | 5   | 46 |
| S241-(+)ssRNA-71 | 8301  | 26  | 181 | 2.18 | 3.13 | 21.80 | plants                        | 80 | 4   | 48 |

## Additional file 12 Continued

|                  |       |    |     |      |      |       |        |    |    |    |
|------------------|-------|----|-----|------|------|-------|--------|----|----|----|
| S242-(+)ssRNA-72 | 4852  | 11 | 79  | 1.63 | 2.27 | 16.28 | plants | 83 | 3  | 51 |
| S243-(+)ssRNA-73 | 7680  | 26 | 167 | 2.17 | 3.39 | 21.74 | plants | 91 | 3  | 42 |
| S244-(+)ssRNA-74 | 7564  | 54 | 413 | 5.46 | 7.14 | 54.60 | plants | 92 | 4  | 66 |
| S245-(+)ssRNA-75 | 6318  | 19 | 125 | 1.98 | 3.01 | 19.78 | plants | 96 | 3  | 56 |
| S246-(+)ssRNA-76 | 6305  | 19 | 124 | 1.97 | 3.01 | 19.67 | plants | 96 | 2  | 61 |
| S247-(+)ssRNA-77 | 15480 | 50 | 329 | 2.13 | 3.23 | 21.25 | plants | 97 | 8  | 46 |
| S248-(+)ssRNA-78 | 15311 | 55 | 365 | 2.38 | 3.59 | 23.84 | plants | 90 | 7  | 36 |
| S249-(+)ssRNA-79 | 17919 | 58 | 376 | 2.10 | 3.24 | 20.98 | plants | 89 | 12 | 46 |
| S250-(+)ssRNA-80 | 6435  | 18 | 120 | 1.86 | 2.80 | 18.65 | plants | 96 | 5  | 46 |
| S251-(+)ssRNA-81 | 7560  | 37 | 247 | 3.27 | 4.89 | 32.67 | plants | 98 | 6  | 51 |
| S252-(+)ssRNA-82 | 8832  | 22 | 140 | 1.59 | 2.49 | 15.85 | plants | 96 | 6  | 49 |
| S253-(+)ssRNA-83 | 9306  | 29 | 191 | 2.05 | 3.12 | 20.52 | plants | 96 | 5  | 43 |
| S254-(+)ssRNA-84 | 6495  | 23 | 150 | 2.31 | 3.54 | 23.09 | plants | 97 | 2  | 41 |
| S255-(+)ssRNA-85 | 7351  | 17 | 112 | 1.52 | 2.31 | 15.24 | plants | 97 | 5  | 49 |
| S256-(+)ssRNA-86 | 7555  | 31 | 200 | 2.65 | 4.10 | 26.47 | plants | 95 | 3  | 41 |
| S257-(+)ssRNA-87 | 4009  | 9  | 64  | 1.60 | 2.24 | 15.96 | fungi  | 91 | 4  | 46 |
